# Supplementary material
Source: PubMed Central journal article supplement (PMC7105274)
Supplement: NIHMS1576308-supplement-Supplemental_Figures.pdf [file NIHMS1576308-supplement-Supplemental_Figures.pdf]

## **Supporting Information**

### **Proteomic Analysis of *Plasmodium* Merosomes: The Link Between Liver and Blood Stages in Malaria**

Melanie J Shears<sup>1</sup>, Raja Sekhar Nirujogi<sup>2,4</sup>, Kristian E Swearingen<sup>3</sup>, Santosh Renuse<sup>2</sup>, Satish Mishra<sup>1</sup>, Panga Jaipal Reddy<sup>3</sup>, Robert L Moritz<sup>3</sup>, Akhilesh Pandey<sup>2</sup>, Photini Sinnis<sup>1\*</sup>

<sup>1</sup> Department of Molecular Microbiology & Immunology, Johns Hopkins Bloomberg School of Public Health, 615 North Wolfe St., Baltimore MD 21205 USA

<sup>2</sup> Department of Biological Chemistry, 733 N. Broadway, Johns Hopkins School of Medicine, Baltimore MD 21205 USA

<sup>3</sup> Institute for Systems Biology, 401 Terry Avenue North Seattle WA 98109 USA

<sup>4</sup> Institute of Bioinformatics, International Tech Park, Bangalore 560 066 India

\*corresponding author:

Photini Sinnis, [psinnis@jhsph.edu](mailto:psinnis@jhsph.edu), tel: 410 502 6918

Current Address:

Akhilesh Pandey: Center for Individualized Medicine and Department of Laboratory Medicine and Pathology, Mayo Clinic, Rochester, MN 55905, USA

Manipal Academy of Higher Education (MAHE), Manipal 576104, Karnataka, India

Satish Mishra: Division of Parasitology, CSIR-Central Drug Research Institute, Lucknow 226031 India

### **Supplementary Figures Table of Contents**

S-1. Supplementary Figure 1. GO Biological Process terms for proteins in the core merosome proteome

S-2. Supplementary Figure 2. Scatterplot of iBAQ intensities for proteins in the core merosome proteome, with apical and merozoite surface proteins highlighted

S-3. Supplementary Figure 3. Annotated representative MS/MS spectra identifying putatively cleaved and acetylated PEXEL motifs.

## Supplementary Figures

### Supplementary Figure 1

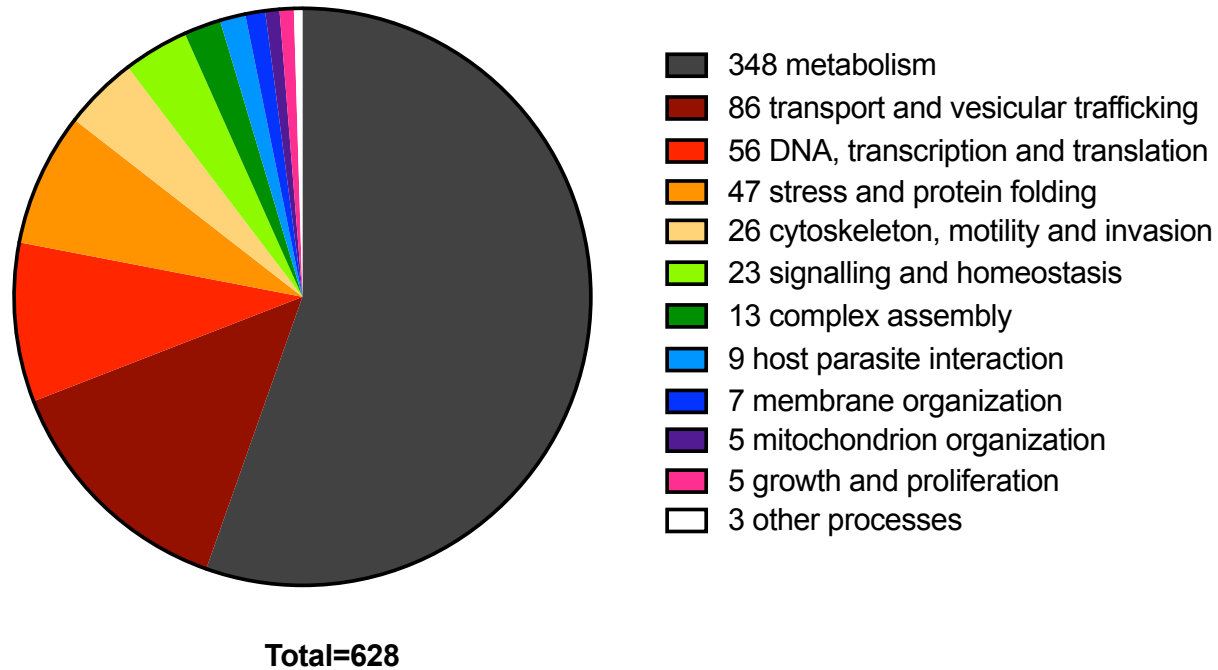

**Supplementary Figure 1. GO Biological Process terms for proteins in the core merozoite proteome.** GO Biological Process terms were inferred from *P. falciparum* orthologs due to the relative paucity of annotations for *P. berghei*. Raw data for this graphic can be found in Supplementary Table 3. For this figure, GO terms were manually combined into groups of interest.

Supplementary Figure 2.

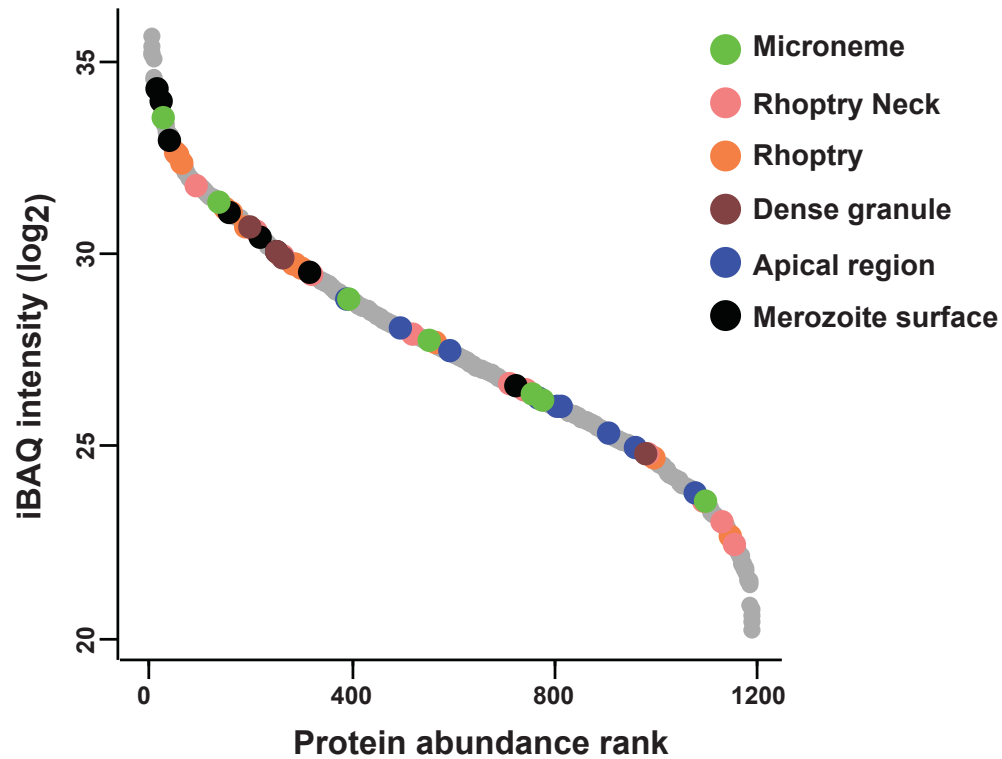

**Supplementary Figure 2. Scatterplot of iBAQ intensities for proteins in the core merozoite proteome, with apical and merozoite surface proteins highlighted.** Proteins in the core *P. berghei* merozoite proteome are ranked based on their summed iBAQ intensities. The abundance was spanned over five orders of magnitude. The apical organelle and merozoite surface proteins are color-coded. Categories and rank abundances as described in Table 1.

**Supplementary Figure 3. Annotated representative MS/MS spectra identifying putatively cleaved and acetylated PEXEL motifs.**

| Gene           | Description                                   | Peptide with cleaved & acetylated PEXEL |
|----------------|-----------------------------------------------|-----------------------------------------|
| PBANKA_0208900 | StAR-related lipid transfer protein, putative | RIL.EEALMDVENVKENLK                     |

**Ions:**

a  1+  2+  3+

b  1+  2+  3+

c  1+  2+  3+

x  1+  2+  3+

y  1+  2+  3+

z  1+  2+  3+

[\[Deselect All\]](#)

**Neutral Loss:**

NH<sub>3</sub> (\*)

H<sub>2</sub>O (o)

H<sub>3</sub>PO<sub>4</sub> (p)

Immonium ions

Reporter ions

**Mass Type:**

Mono  Avg

Mass Tol:

Th  ppm

**Update**

**Peak Assignment:**

Most Intense

Nearest Match

Peak Detect

**Peak Labels:**

Ion  m/z

None

Width:

Height:

**EEALMDVENVKENLK, MH+ 1802.8841, m/z 901.9457**

File: Rep1\_F1.45421.45421.2, Scan: 45421, Exp. m/z: 901.9464, Charge: 2

Click and drag in the plot to zoom X:  Y:  **Zoom Out** **Print**  Enable tooltip  Plot mass error

MS1 scan: 45419, RT 7782.26

| b+        | #  | Seq | #  | y+        | y2+      |
|-----------|----|-----|----|-----------|----------|
| 172.0604  | 1  | E   | 15 |           |          |
| 301.1030  | 2  | E   | 14 | 1631.8309 | 816.4191 |
| 372.1401  | 3  | A   | 13 | 1502.7883 | 751.8978 |
| 485.2242  | 4  | L   | 12 | 1431.7512 | 716.3792 |
| 616.2647  | 5  | M   | 11 | 1318.6671 | 659.8372 |
| 731.2916  | 6  | D   | 10 | 1187.6266 | 594.3170 |
| 830.3600  | 7  | V   | 9  | 1072.5997 | 536.8035 |
| 959.4026  | 8  | E   | 8  | 973.5313  | 487.2693 |
| 1073.4456 | 9  | N   | 7  | 844.4887  | 422.7480 |
| 1172.5140 | 10 | V   | 6  | 730.4458  | 365.7265 |
| 1300.6089 | 11 | K   | 5  | 631.3774  | 316.1923 |
| 1429.6515 | 12 | E   | 4  | 503.2824  | 252.1448 |
| 1543.6945 | 13 | N   | 3  | 374.2398  | 187.6235 |
| 1656.7785 | 14 | L   | 2  | 260.1969  | 130.6021 |
|           | 15 | K   | 1  | 147.1128  | 74.0600  |

[\[Click\]](#) to move table

Add to N-term: **42.010565**

| Gene           | Description                                   | Peptide with cleaved & acetylated PEXEL |
|----------------|-----------------------------------------------|-----------------------------------------|
| PBANKA_0208900 | StAR-related lipid transfer protein, putative | RIL.EEALMDVENVKENLK                     |

**Ions:**

a  1+  2+  3+

b  1+  2+  3+

c  1+  2+  3+

x  1+  2+  3+

y  1+  2+  3+

z  1+  2+  3+

[\[Deselect All\]](#)

**Neutral Loss:**

NH<sub>3</sub> (\*)

H<sub>2</sub>O (o)

H<sub>3</sub>PO<sub>4</sub> (p)

Immonium ions

Reporter ions

**Mass Type:**

Mono  Avg

Mass Tol:

Th  ppm

**Update**

**Peak Assignment:**

Most Intense

Nearest Match

Peak Detect

**Peak Labels:**

Ion  m/z

None

Width:

Height:

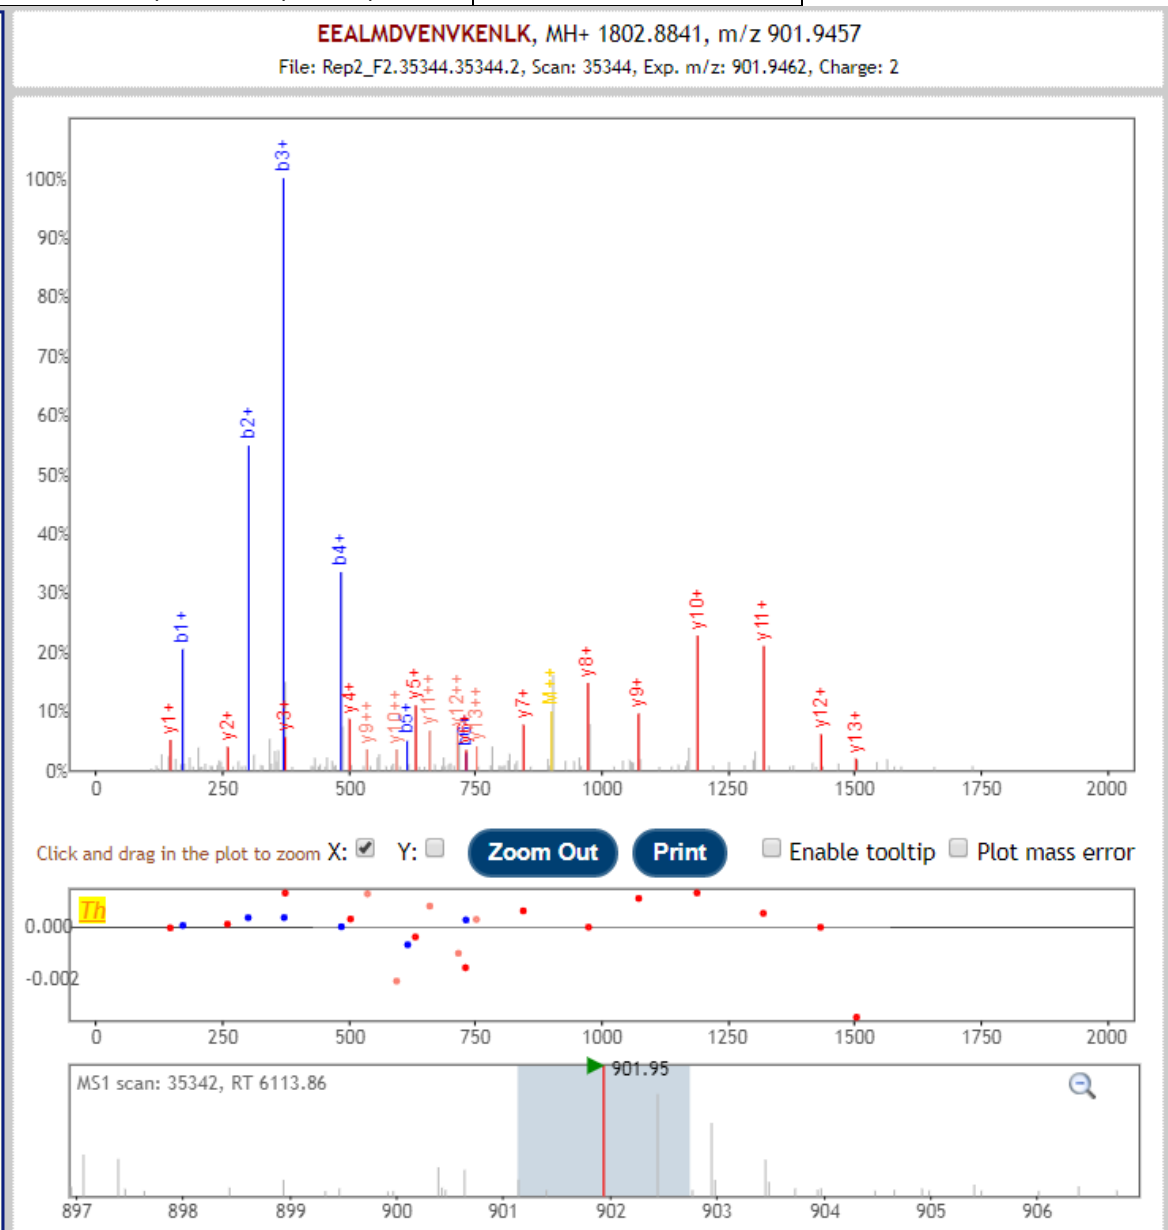

| b+        | #  | Seq | #  | y+        | y2+      |
|-----------|----|-----|----|-----------|----------|
| 172.0604  | 1  | E   | 15 |           |          |
| 301.1030  | 2  | E   | 14 | 1631.8309 | 816.4191 |
| 372.1401  | 3  | A   | 13 | 1502.7883 | 751.8978 |
| 485.2242  | 4  | L   | 12 | 1431.7512 | 716.3792 |
| 616.2647  | 5  | M   | 11 | 1318.6671 | 659.8372 |
| 731.2916  | 6  | D   | 10 | 1187.6266 | 594.3170 |
| 830.3600  | 7  | V   | 9  | 1072.5997 | 536.8035 |
| 959.4026  | 8  | E   | 8  | 973.5313  | 487.2693 |
| 1073.4456 | 9  | N   | 7  | 844.4887  | 422.7480 |
| 1172.5140 | 10 | V   | 6  | 730.4458  | 365.7265 |
| 1300.6089 | 11 | K   | 5  | 631.3774  | 316.1923 |
| 1429.6515 | 12 | E   | 4  | 503.2824  | 252.1448 |
| 1543.6945 | 13 | N   | 3  | 374.2398  | 187.6235 |
| 1656.7785 | 14 | L   | 2  | 260.1969  | 130.6021 |
|           | 15 | K   | 1  | 147.1128  | 74.0600  |

[\[Click\]](#) to move table

Add to N-term: **42.010565**

| Gene           | Description                                   | Peptide with cleaved & acetylated PEXEL |
|----------------|-----------------------------------------------|-----------------------------------------|
| PBANKA_0208900 | StAR-related lipid transfer protein, putative | RIL.EEALMDVENVKENLK                     |

**Ions:**

a  1+  2+  3+

b  1+  2+  3+

c  1+  2+  3+

x  1+  2+  3+

y  1+  2+  3+

z  1+  2+  3+

[\[Deselect All\]](#)

**Neutral Loss:**

NH<sub>3</sub> (\*)

H<sub>2</sub>O (o)

H<sub>3</sub>PO<sub>4</sub> (p)

Immonium ions

Reporter ions

**Mass Type:**

Mono  Avg

Mass Tol:

Th  ppm

**Update**

**Peak Assignment:**

Most Intense

Nearest Match

Peak Detect

**Peak Labels:**

Ion  m/z

None

Width:

Height:

**EEALMDVENVKENLK, MH+ 1802.8841, m/z 901.9457**

File: Rep3\_F1.32040.32040.2, Scan: 32040, Exp. m/z: 901.9462, Charge: 2

Click and drag in the plot to zoom X:  Y:  **Zoom Out** **Print**  Enable tooltip  Plot mass error

MS1 scan: 32038, RT 6075.52

| b+        | #  | Seq | #  | y+        | y2+      |
|-----------|----|-----|----|-----------|----------|
| 172.0604  | 1  | E   | 15 |           |          |
| 301.1030  | 2  | E   | 14 | 1631.8309 | 816.4191 |
| 372.1401  | 3  | A   | 13 | 1502.7883 | 751.8978 |
| 485.2242  | 4  | L   | 12 | 1431.7512 | 716.3792 |
| 616.2647  | 5  | M   | 11 | 1318.6671 | 659.8372 |
| 731.2916  | 6  | D   | 10 | 1187.6266 | 594.3170 |
| 830.3600  | 7  | V   | 9  | 1072.5997 | 536.8035 |
| 959.4026  | 8  | E   | 8  | 973.5313  | 487.2693 |
| 1073.4456 | 9  | N   | 7  | 844.4887  | 422.7480 |
| 1172.5140 | 10 | V   | 6  | 730.4458  | 365.7265 |
| 1300.6089 | 11 | K   | 5  | 631.3774  | 316.1923 |
| 1429.6515 | 12 | E   | 4  | 503.2824  | 252.1448 |
| 1543.6945 | 13 | N   | 3  | 374.2398  | 187.6235 |
| 1656.7785 | 14 | L   | 2  | 260.1969  | 130.6021 |
|           | 15 | K   | 1  | 147.1128  | 74.0600  |

[\[Click\]](#) to move table

Add to N-term: **42.010565**

| Gene           | Description                                   | Peptide with cleaved & acetylated PEXEL |
|----------------|-----------------------------------------------|-----------------------------------------|
| PBANKA_0208900 | StAR-related lipid transfer protein, putative | RIL.EEALMDVENVKENLKYVQQAQ               |

**Ions:**

a  1+  2+  3+

b  1+  2+  3+

c  1+  2+  3+

x  1+  2+  3+

y  1+  2+  3+

z  1+  2+  3+

[\[Deselect ALL\]](#)

**Neutral Loss:**

NH<sub>3</sub> (\*)

H<sub>2</sub>O (o)

H<sub>3</sub>PO<sub>4</sub> (p)

Immonium ions

Reporter ions

**Mass Type:**

Mono  Avg

Mass Tol:

Th  ppm

**Update**

**Peak Assignment:**

Most Intense

Nearest Match

Peak Detect

**Peak Labels:**

Ion  m/z

None

Width:

Height:

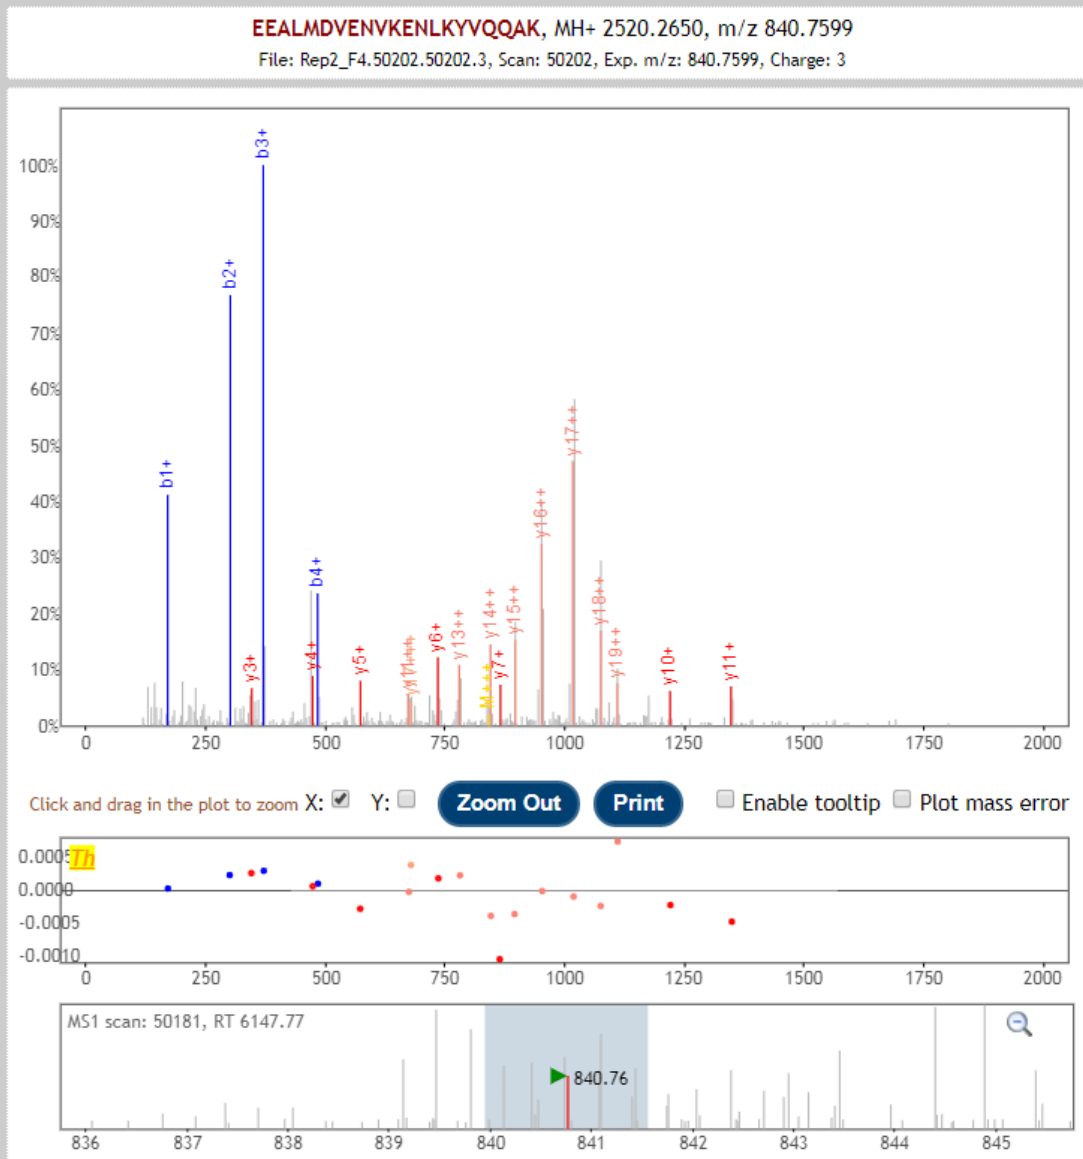

| b+        | #  | Seq | #  | y+        | y2+       | y3+      |
|-----------|----|-----|----|-----------|-----------|----------|
| 172.0604  | 1  | E   | 21 |           |           |          |
| 301.1030  | 2  | E   | 20 | 2349.2119 | 1175.1096 | 783.7421 |
| 372.1401  | 3  | A   | 19 | 2220.1693 | 1110.5883 | 740.7279 |
| 485.2242  | 4  | L   | 18 | 2149.1322 | 1075.0697 | 717.0489 |
| 616.2647  | 5  | M   | 17 | 2036.0481 | 1018.5277 | 679.3542 |
| 731.2916  | 6  | D   | 16 | 1905.0076 | 953.0074  | 635.6741 |
| 830.3600  | 7  | V   | 15 | 1789.9807 | 895.4940  | 597.3317 |
| 959.4026  | 8  | E   | 14 | 1690.9123 | 845.9598  | 564.3089 |
| 1073.4456 | 9  | N   | 13 | 1561.8697 | 781.4385  | 521.2947 |
| 1172.5140 | 10 | V   | 12 | 1447.8267 | 724.4170  | 483.2804 |
| 1300.6089 | 11 | K   | 11 | 1348.7583 | 674.8828  | 450.2576 |
| 1429.6515 | 12 | E   | 10 | 1220.6634 | 610.8353  | 407.5593 |
| 1543.6945 | 13 | N   | 9  | 1091.6208 | 546.3140  | 364.5451 |
| 1656.7785 | 14 | L   | 8  | 977.5778  | 489.2926  | 326.5308 |
| 1784.8735 | 15 | K   | 7  | 864.4938  | 432.7505  | 288.8361 |
| 1947.9368 | 16 | Y   | 6  | 736.3988  | 368.7030  | 246.1378 |
| 2047.0052 | 17 | V   | 5  | 573.3355  | 287.1714  | 191.7833 |
| 2175.0638 | 18 | Q   | 4  | 474.2671  | 237.6372  | 158.7605 |
| 2303.1224 | 19 | Q   | 3  | 346.2085  | 173.6079  | 116.0743 |
| 2374.1595 | 20 | A   | 2  | 218.1499  | 109.5786  | 73.3882  |
|           | 21 | K   | 1  | 147.1128  | 74.0600   | 49.7091  |

[\[Click\]](#) to move table

Add to N-term: **42.010565**



| Gene           | Description                                   | Peptide with cleaved & acetylated PEXEL |
|----------------|-----------------------------------------------|-----------------------------------------|
| PBANKA_0208900 | StAR-related lipid transfer protein, putative | RIL.EEALMDVENVKENLKYYVQQA               |

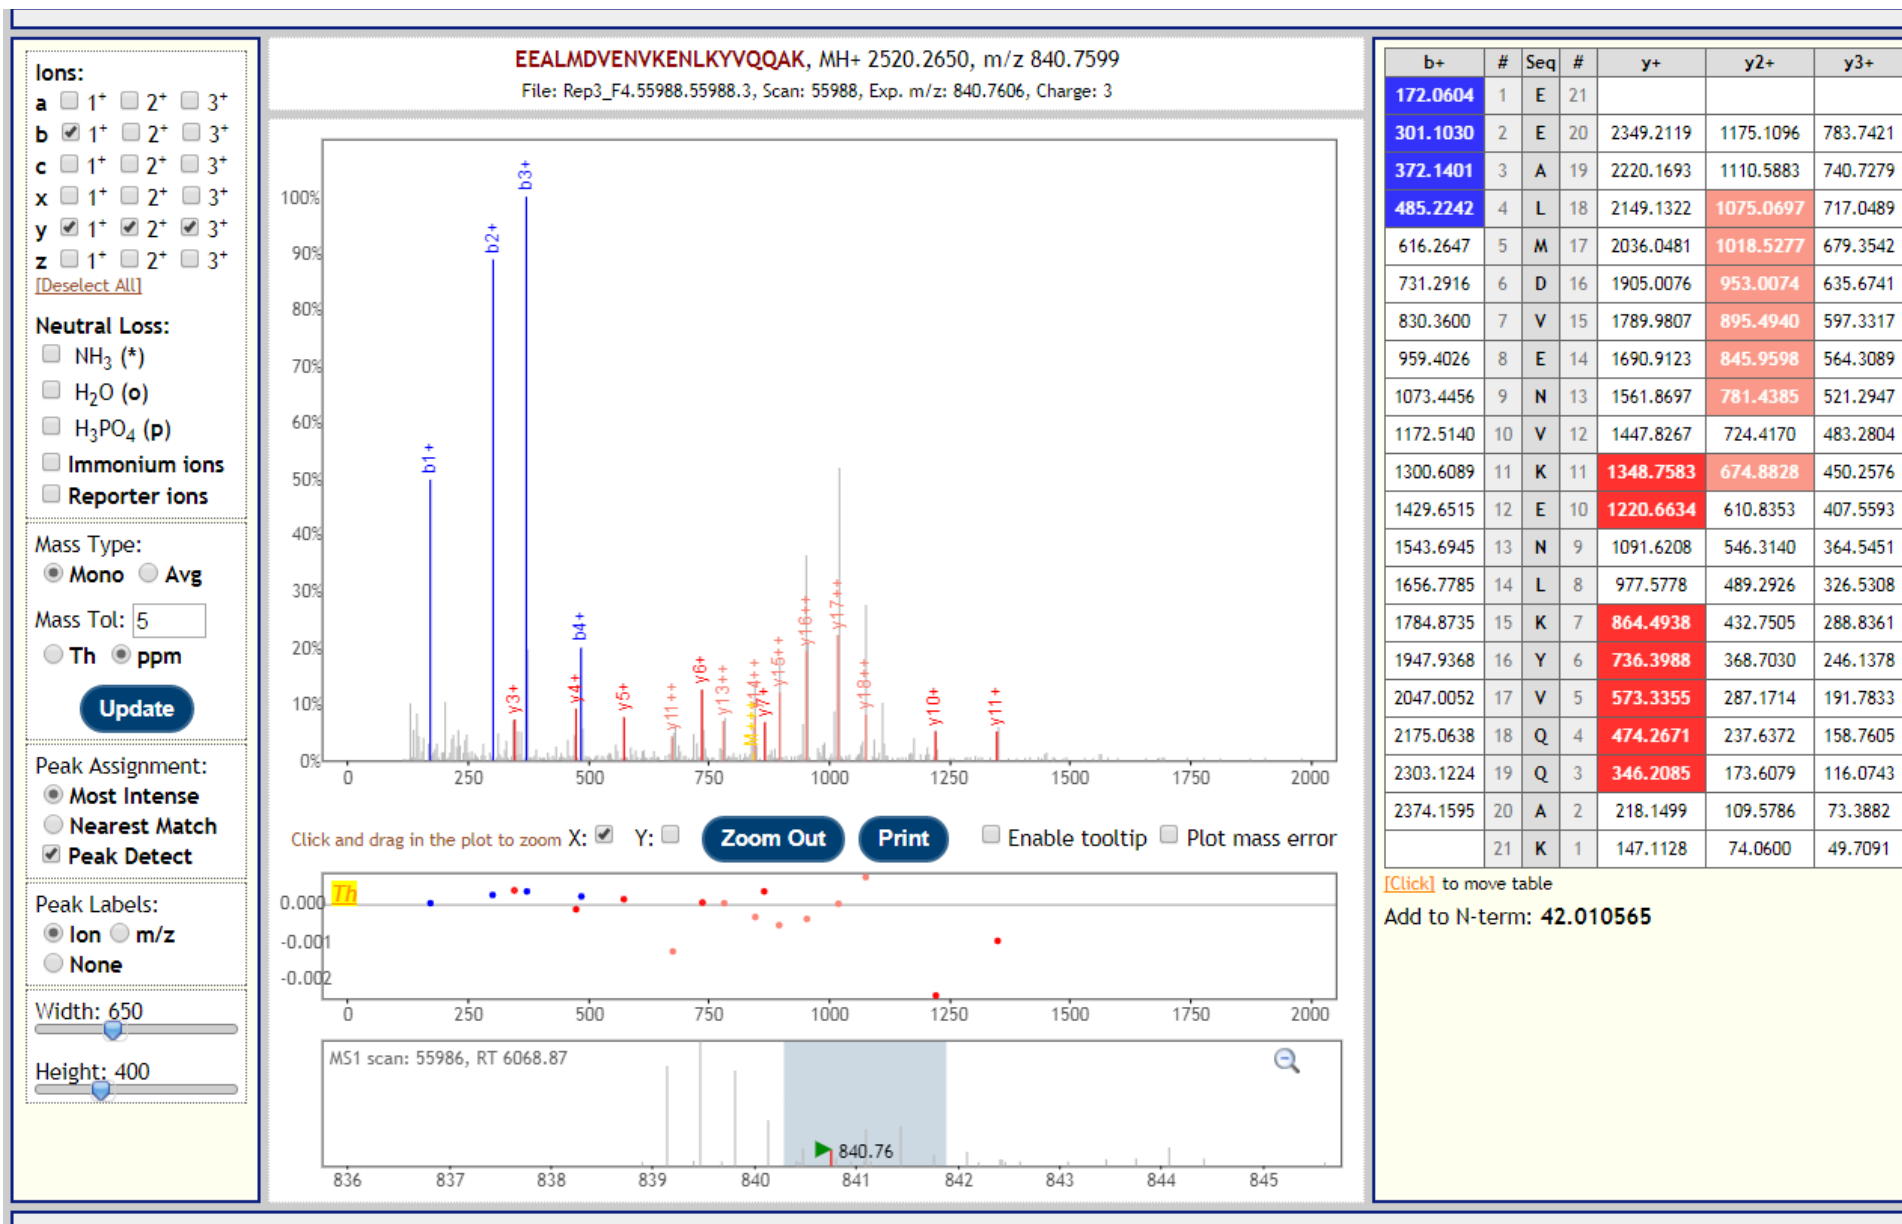

| Gene           | Description                                   | Peptide with cleaved & acetylated PEXEL |
|----------------|-----------------------------------------------|-----------------------------------------|
| PBANKA_0208900 | StAR-related lipid transfer protein, putative | RIL.EEALMDVENVK                         |

**Ions:**

a  1<sup>+</sup>  2<sup>+</sup>  3<sup>+</sup>

b  1<sup>+</sup>  2<sup>+</sup>  3<sup>+</sup>

c  1<sup>+</sup>  2<sup>+</sup>  3<sup>+</sup>

x  1<sup>+</sup>  2<sup>+</sup>  3<sup>+</sup>

y  1<sup>+</sup>  2<sup>+</sup>  3<sup>+</sup>

z  1<sup>+</sup>  2<sup>+</sup>  3<sup>+</sup>

[\[Deselect All\]](#)

**Neutral Loss:**

NH<sub>3</sub> (\*)

H<sub>2</sub>O (o)

H<sub>3</sub>PO<sub>4</sub> (p)

Immonium ions

Reporter ions

**Mass Type:**

Mono  Avg

Mass Tol:

Th  ppm

**Update**

**Peak Assignment:**

Most Intense

Nearest Match

Peak Detect

**Peak Labels:**

Ion  m/z

None

Width:

Height:

**EEALMDVENVK, MH+ 1318.6195, m/z 659.8134**

File: Rep1\_F1.45239.45239.2, Scan: 45239, Exp. m/z: 659.8152, Charge: 2

Click and drag in the plot to zoom X:  Y:  **Zoom Out** **Print**  Enable tooltip  Plot mass error

MS1 scan: 45227, RT 7753.22

| b+        | #  | Seq | #  | y+        |
|-----------|----|-----|----|-----------|
| 172.0604  | 1  | E   | 11 |           |
| 301.1030  | 2  | E   | 10 | 1147.5664 |
| 372.1401  | 3  | A   | 9  | 1018.5238 |
| 485.2242  | 4  | L   | 8  | 947.4866  |
| 616.2647  | 5  | M   | 7  | 834.4026  |
| 731.2916  | 6  | D   | 6  | 703.3621  |
| 830.3600  | 7  | V   | 5  | 588.3352  |
| 959.4026  | 8  | E   | 4  | 489.2667  |
| 1073.4456 | 9  | N   | 3  | 360.2241  |
| 1172.5140 | 10 | V   | 2  | 246.1812  |
|           | 11 | K   | 1  | 147.1128  |

[\[Click\]](#) to move table

Add to N-term: **42.010565**

| Gene           | Description                                   | Peptide with cleaved & acetylated PEXEL |
|----------------|-----------------------------------------------|-----------------------------------------|
| PBANKA_1400700 | Plasmodium exported protein, unknown function | RHL.AEYIPNISNPTGNVYHFSR                 |

**Ions:**

a  1<sup>+</sup>  2<sup>+</sup>  3<sup>+</sup>

b  1<sup>+</sup>  2<sup>+</sup>  3<sup>+</sup>

c  1<sup>+</sup>  2<sup>+</sup>  3<sup>+</sup>

x  1<sup>+</sup>  2<sup>+</sup>  3<sup>+</sup>

y  1<sup>+</sup>  2<sup>+</sup>  3<sup>+</sup>

z  1<sup>+</sup>  2<sup>+</sup>  3<sup>+</sup>

[Deselect All](#)

**Neutral Loss:**

NH<sub>3</sub> (\*)

H<sub>2</sub>O (o)

H<sub>3</sub>PO<sub>4</sub> (p)

Immonium ions

Reporter ions

**Mass Type:**

Mono  Avg

Mass Tol:

Th  ppm

**Update**

**Peak Assignment:**

Most Intense

Nearest Match

Peak Detect

**Peak Labels:**

Ion  m/z

None

Width:

Height:

**AEYIPNISNPTGNVYHFSR, MH+ 2221.0673, m/z 1111.0373**

File: Rep1\_F2.67333.67333.2, Scan: 67333, Exp. m/z: 1111.0361, Charge: 2

Click and drag in the plot to zoom X:  Y:  **Zoom Out** **Print**  Enable tooltip  Plot mass error

| b+        | #  | Seq # | y+        | y2+       | y3+      |
|-----------|----|-------|-----------|-----------|----------|
| 114.0550  | 1  | A 19  |           |           |          |
| 243.0975  | 2  | E 18  | 2108.0196 | 1054.5134 | 703.3447 |
| 406.1609  | 3  | Y 17  | 1978.9770 | 989.9921  | 660.3305 |
| 519.2449  | 4  | I 16  | 1815.9137 | 908.4605  | 605.9761 |
| 616.2977  | 5  | P 15  | 1702.8296 | 851.9184  | 568.2814 |
| 730.3406  | 6  | N 14  | 1605.7768 | 803.3921  | 535.9305 |
| 843.4247  | 7  | I 13  | 1491.7339 | 746.3706  | 497.9162 |
| 930.4567  | 8  | S 12  | 1378.6498 | 689.8286  | 460.2215 |
| 1044.4997 | 9  | N 11  | 1291.6178 | 646.3125  | 431.2108 |
| 1141.5524 | 10 | P 10  | 1177.5749 | 589.2911  | 393.1965 |
| 1242.6001 | 11 | T 9   | 1080.5221 | 540.7647  | 360.8456 |
| 1299.6216 | 12 | G 8   | 979.4744  | 490.2409  | 327.1630 |
| 1413.6645 | 13 | N 7   | 922.4530  | 461.7301  | 308.1558 |
| 1512.7329 | 14 | V 6   | 808.4100  | 404.7087  | 270.1415 |
| 1675.7962 | 15 | Y 5   | 709.3416  | 355.1745  | 237.1187 |
| 1812.8551 | 16 | H 4   | 546.2783  | 273.6428  | 182.7643 |
| 1959.9236 | 17 | F 3   | 409.2194  | 205.1133  | 137.0780 |
| 2046.9556 | 18 | S 2   | 262.1510  | 131.5791  | 88.0552  |
|           | 19 | R 1   | 175.1190  | 88.0631   | 59.0445  |

[\[Click\]](#) to move table

Add to N-term: **42.010565**

| Gene           | Description                                   | Peptide with cleaved & acetylated PEXEL |
|----------------|-----------------------------------------------|-----------------------------------------|
| PBANKA_1400700 | Plasmodium exported protein, unknown function | RHL.AEYIPNISNPTGNVYHFSR                 |

**Ions:**

a  1<sup>+</sup>  2<sup>+</sup>  3<sup>+</sup>

b  1<sup>+</sup>  2<sup>+</sup>  3<sup>+</sup>

c  1<sup>+</sup>  2<sup>+</sup>  3<sup>+</sup>

x  1<sup>+</sup>  2<sup>+</sup>  3<sup>+</sup>

y  1<sup>+</sup>  2<sup>+</sup>  3<sup>+</sup>

z  1<sup>+</sup>  2<sup>+</sup>  3<sup>+</sup>

[\[Deselect All\]](#)

**Neutral Loss:**

NH<sub>3</sub> (\*)

H<sub>2</sub>O (o)

H<sub>3</sub>PO<sub>4</sub> (p)

Immonium ions

Reporter ions

**Mass Type:**

Mono  Avg

Mass Tol:

Th  ppm

**Update**

**Peak Assignment:**

Most Intense

Nearest Match

Peak Detect

**Peak Labels:**

Ion  m/z

None

Width:

Height:

**AEYIPNISNPTGNVYHFSR, MH+ 2221.0673, m/z 1111.0373**

File: Rep2\_F5.61381.61381.2, Scan: 61381, Exp. m/z: 1111.0359, Charge: 2

Click and drag in the plot to zoom X:  Y:  **Zoom Out** **Print**  Enable tooltip  Plot mass error

MS1 scan: 61362, RT 6637.75

| b+        | #  | Seq | #  | y+        | y2+       |
|-----------|----|-----|----|-----------|-----------|
| 114.0550  | 1  | A   | 19 |           |           |
| 243.0975  | 2  | E   | 18 | 2108.0196 | 1054.5134 |
| 406.1609  | 3  | Y   | 17 | 1978.9770 | 989.9921  |
| 519.2449  | 4  | I   | 16 | 1815.9137 | 908.4605  |
| 616.2977  | 5  | P   | 15 | 1702.8296 | 851.9184  |
| 730.3406  | 6  | N   | 14 | 1605.7768 | 803.3921  |
| 843.4247  | 7  | I   | 13 | 1491.7339 | 746.3706  |
| 930.4567  | 8  | S   | 12 | 1378.6498 | 689.8286  |
| 1044.4997 | 9  | N   | 11 | 1291.6178 | 646.3125  |
| 1141.5524 | 10 | P   | 10 | 1177.5749 | 589.2911  |
| 1242.6001 | 11 | T   | 9  | 1080.5221 | 540.7647  |
| 1299.6216 | 12 | G   | 8  | 979.4744  | 490.2409  |
| 1413.6645 | 13 | N   | 7  | 922.4530  | 461.7301  |
| 1512.7329 | 14 | V   | 6  | 808.4100  | 404.7087  |
| 1675.7962 | 15 | Y   | 5  | 709.3416  | 355.1745  |
| 1812.8551 | 16 | H   | 4  | 546.2783  | 273.6428  |
| 1959.9236 | 17 | F   | 3  | 409.2194  | 205.1133  |
| 2046.9556 | 18 | S   | 2  | 262.1510  | 131.5791  |
|           | 19 | R   | 1  | 175.1190  | 88.0631   |

[\[Click\]](#) to move table

Add to N-term: **42.010565**

| Gene           | Description                                   | Peptide with cleaved & acetylated PEXEL |
|----------------|-----------------------------------------------|-----------------------------------------|
| PBANKA_1400700 | Plasmodium exported protein, unknown function | RHL.AEYIPNISNPTGNVYHFSR                 |

**Ions:**

a  1+  2+  3+

b  1+  2+  3+

c  1+  2+  3+

x  1+  2+  3+

y  1+  2+  3+

z  1+  2+  3+

[\[Deselect All\]](#)

**Neutral Loss:**

NH<sub>3</sub> (\*)

H<sub>2</sub>O (o)

H<sub>3</sub>PO<sub>4</sub> (p)

Immonium ions

Reporter ions

**Mass Type:**

Mono  Avg

Mass Tol:

Th  ppm

**Update**

**Peak Assignment:**

Most Intense

Nearest Match

Peak Detect

**Peak Labels:**

Ion  m/z

None

Width:

Height:

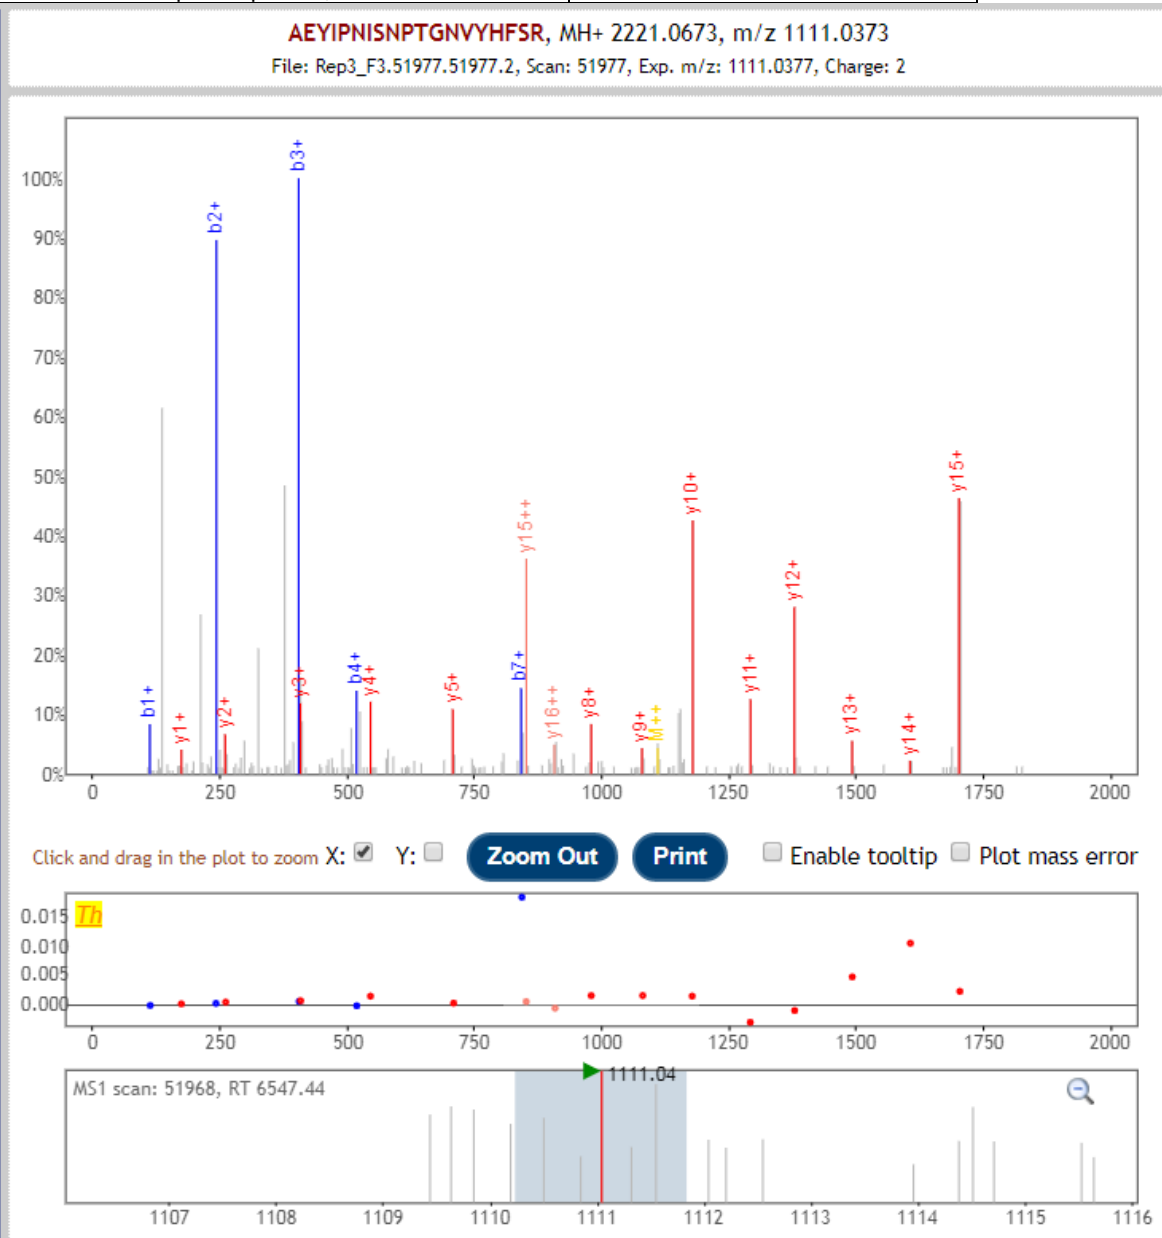

| b+        | #  | Seq | #  | y+        | y2+       |
|-----------|----|-----|----|-----------|-----------|
| 114.0550  | 1  | A   | 19 |           |           |
| 243.0975  | 2  | E   | 18 | 2108.0196 | 1054.5134 |
| 406.1609  | 3  | Y   | 17 | 1978.9770 | 989.9921  |
| 519.2449  | 4  | I   | 16 | 1815.9137 | 908.4605  |
| 616.2977  | 5  | P   | 15 | 1702.8296 | 851.9184  |
| 730.3406  | 6  | N   | 14 | 1605.7768 | 803.3921  |
| 843.4247  | 7  | I   | 13 | 1491.7339 | 746.3706  |
| 930.4567  | 8  | S   | 12 | 1378.6498 | 689.8286  |
| 1044.4997 | 9  | N   | 11 | 1291.6178 | 646.3125  |
| 1141.5524 | 10 | P   | 10 | 1177.5749 | 589.2911  |
| 1242.6001 | 11 | T   | 9  | 1080.5221 | 540.7647  |
| 1299.6216 | 12 | G   | 8  | 979.4744  | 490.2409  |
| 1413.6645 | 13 | N   | 7  | 922.4530  | 461.7301  |
| 1512.7329 | 14 | V   | 6  | 808.4100  | 404.7087  |
| 1675.7962 | 15 | Y   | 5  | 709.3416  | 355.1745  |
| 1812.8551 | 16 | H   | 4  | 546.2783  | 273.6428  |
| 1959.9236 | 17 | F   | 3  | 409.2194  | 205.1133  |
| 2046.9556 | 18 | S   | 2  | 262.1510  | 131.5791  |
|           | 19 | R   | 1  | 175.1190  | 88.0631   |

[\[Click\]](#) to move table

Add to N-term: **42.010565**

| Gene           | Description              | Peptide with cleaved & acetylated PEXEL |
|----------------|--------------------------|-----------------------------------------|
| PBANKA_1003000 | liver specific protein 2 | RIL.AETQHENLVLSTDKDKER                  |

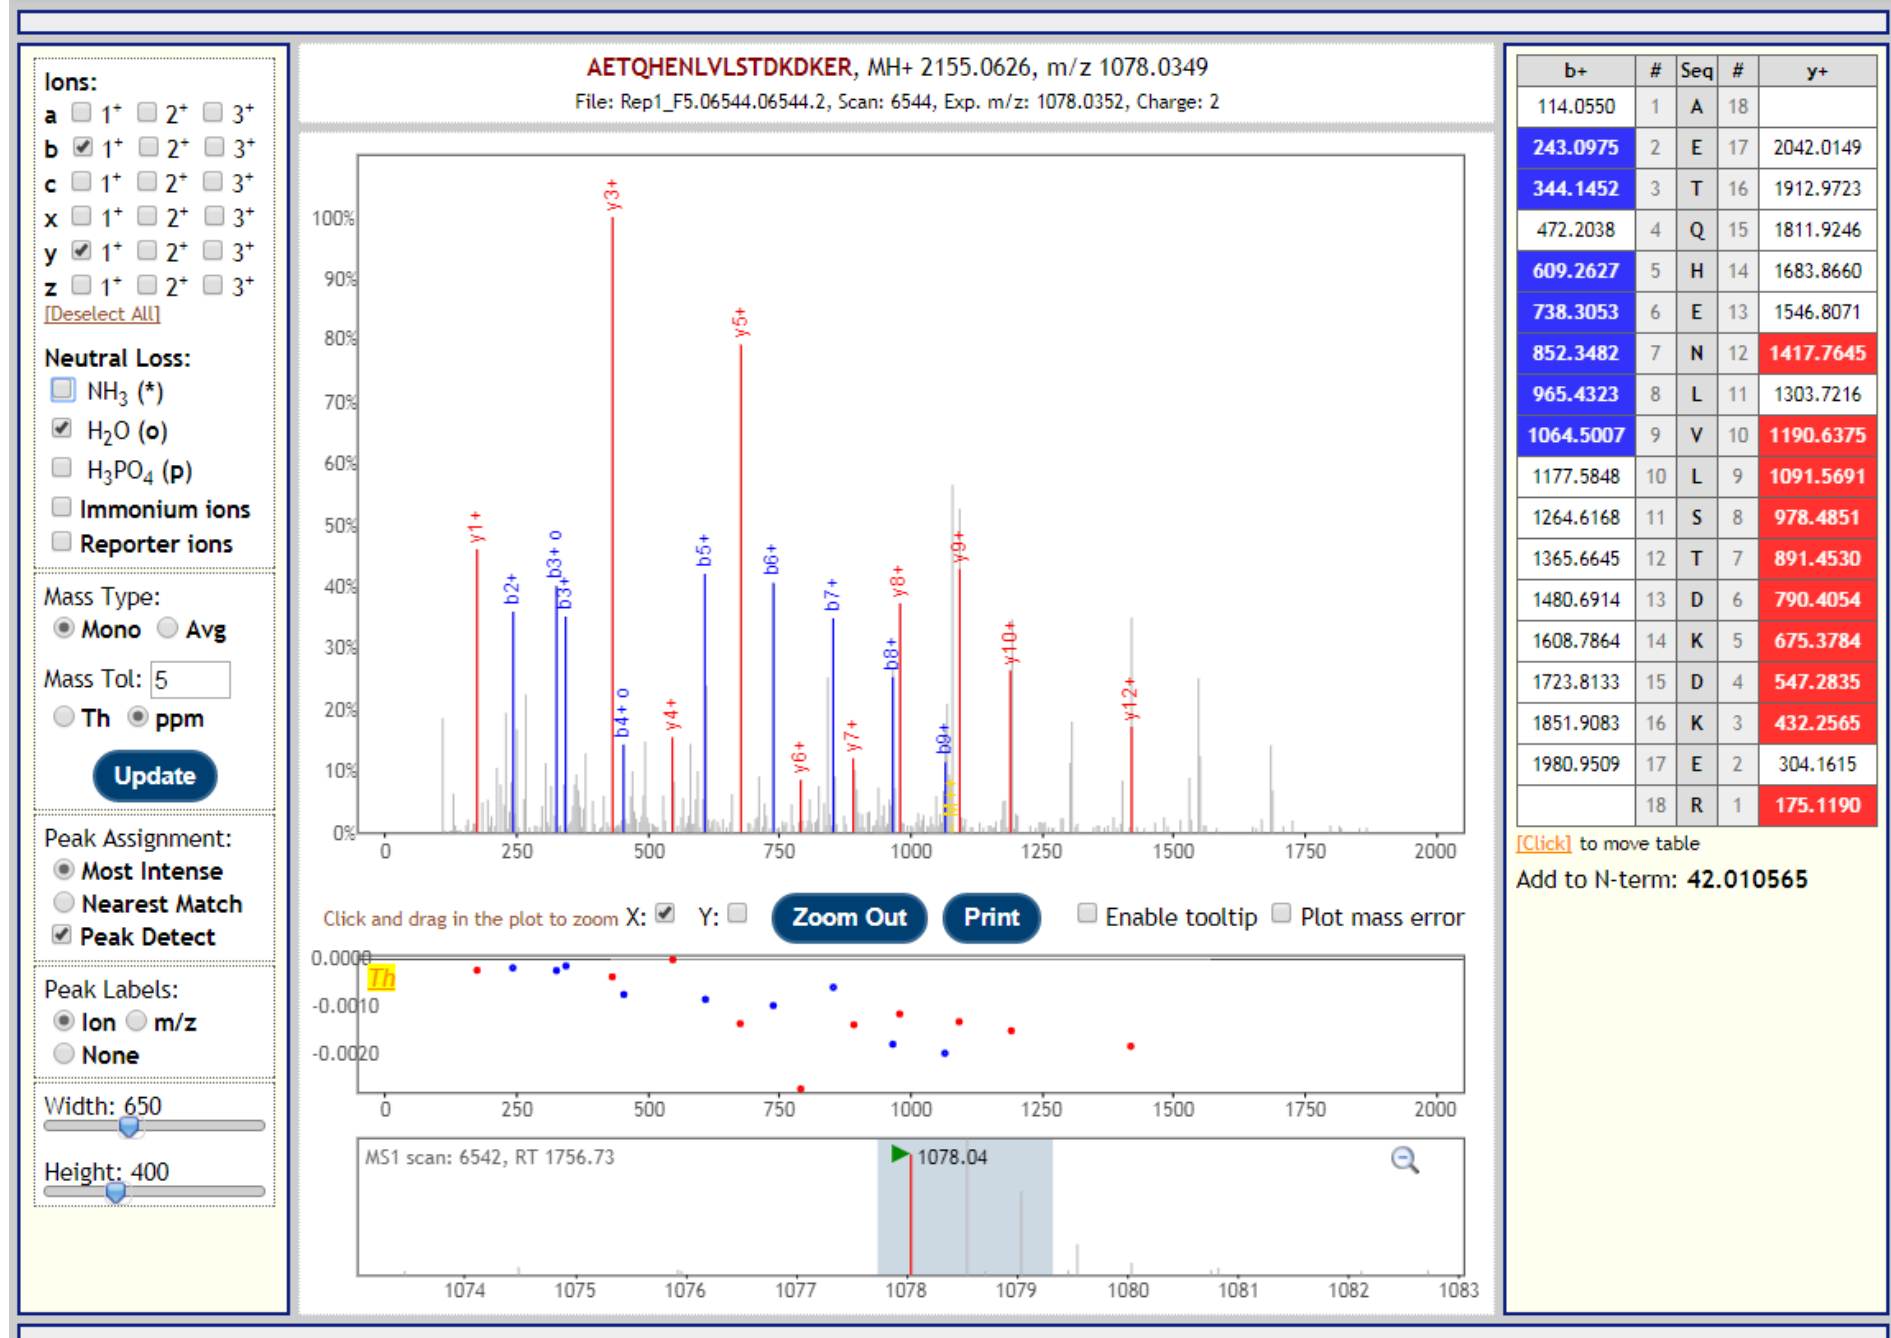

| Gene           | Description              | Peptide with cleaved & acetylated PEXEL |
|----------------|--------------------------|-----------------------------------------|
| PBANKA_1003000 | liver specific protein 2 | RIL.AETQHENLVLSTDKDKER                  |

**Ions:**

a  1<sup>+</sup>  2<sup>+</sup>  3<sup>+</sup>

b  1<sup>+</sup>  2<sup>+</sup>  3<sup>+</sup>

c  1<sup>+</sup>  2<sup>+</sup>  3<sup>+</sup>

x  1<sup>+</sup>  2<sup>+</sup>  3<sup>+</sup>

y  1<sup>+</sup>  2<sup>+</sup>  3<sup>+</sup>

z  1<sup>+</sup>  2<sup>+</sup>  3<sup>+</sup>

[\[Deselect All\]](#)

**Neutral Loss:**

NH<sub>3</sub> (\*)

H<sub>2</sub>O (o)

H<sub>3</sub>PO<sub>4</sub> (p)

Immonium ions

Reporter ions

**Mass Type:**

Mono  Avg

Mass Tol:

Th  ppm

[Update](#)

**Peak Assignment:**

Most Intense

Nearest Match

Peak Detect

**Peak Labels:**

Ion  m/z

None

Width:

Height:

**AETQHENLVLSTDKDKER, MH+ 2155.0626, m/z 1078.0349**

File: Rep2\_F5.09492.09492.2, Scan: 9492, Exp. m/z: 1078.0343, Charge: 2

Click and drag in the plot to zoom X:  Y:  [Zoom Out](#) [Print](#)  Enable tooltip  Plot mass error

MS1 scan: 9477, RT 1662.27

| b+        | #  | Seq | #  | y+        |
|-----------|----|-----|----|-----------|
| 114.0550  | 1  | A   | 18 |           |
| 243.0975  | 2  | E   | 17 | 2042.0149 |
| 344.1452  | 3  | T   | 16 | 1912.9723 |
| 472.2038  | 4  | Q   | 15 | 1811.9246 |
| 609.2627  | 5  | H   | 14 | 1683.8660 |
| 738.3053  | 6  | E   | 13 | 1546.8071 |
| 852.3482  | 7  | N   | 12 | 1417.7645 |
| 965.4323  | 8  | L   | 11 | 1303.7216 |
| 1064.5007 | 9  | V   | 10 | 1190.6375 |
| 1177.5848 | 10 | L   | 9  | 1091.5691 |
| 1264.6168 | 11 | S   | 8  | 978.4851  |
| 1365.6645 | 12 | T   | 7  | 891.4530  |
| 1480.6914 | 13 | D   | 6  | 790.4054  |
| 1608.7864 | 14 | K   | 5  | 675.3784  |
| 1723.8133 | 15 | D   | 4  | 547.2835  |
| 1851.9083 | 16 | K   | 3  | 432.2565  |
| 1980.9509 | 17 | E   | 2  | 304.1615  |
|           | 18 | R   | 1  | 175.1190  |

[\[Click\]](#) to move table

Add to N-term: **42.010565**

| Gene           | Description              | Peptide with cleaved & acetylated PEXEL |
|----------------|--------------------------|-----------------------------------------|
| PBANKA_1003000 | liver specific protein 2 | RIL.AETQHENLVLSTDKDKER                  |

**Ions:**

a  1+  2+  3+

b  1+  2+  3+

c  1+  2+  3+

x  1+  2+  3+

y  1+  2+  3+

z  1+  2+  3+

[\[Deselect All\]](#)

**Neutral Loss:**

NH<sub>3</sub> (\*)

H<sub>2</sub>O (o)

H<sub>3</sub>PO<sub>4</sub> (p)

Immonium ions

Reporter ions

**Mass Type:**

Mono  Avg

Mass Tol:

Th  ppm

**Update**

**Peak Assignment:**

Most Intense

Nearest Match

Peak Detect

**Peak Labels:**

Ion  m/z

None

Width:

Height:

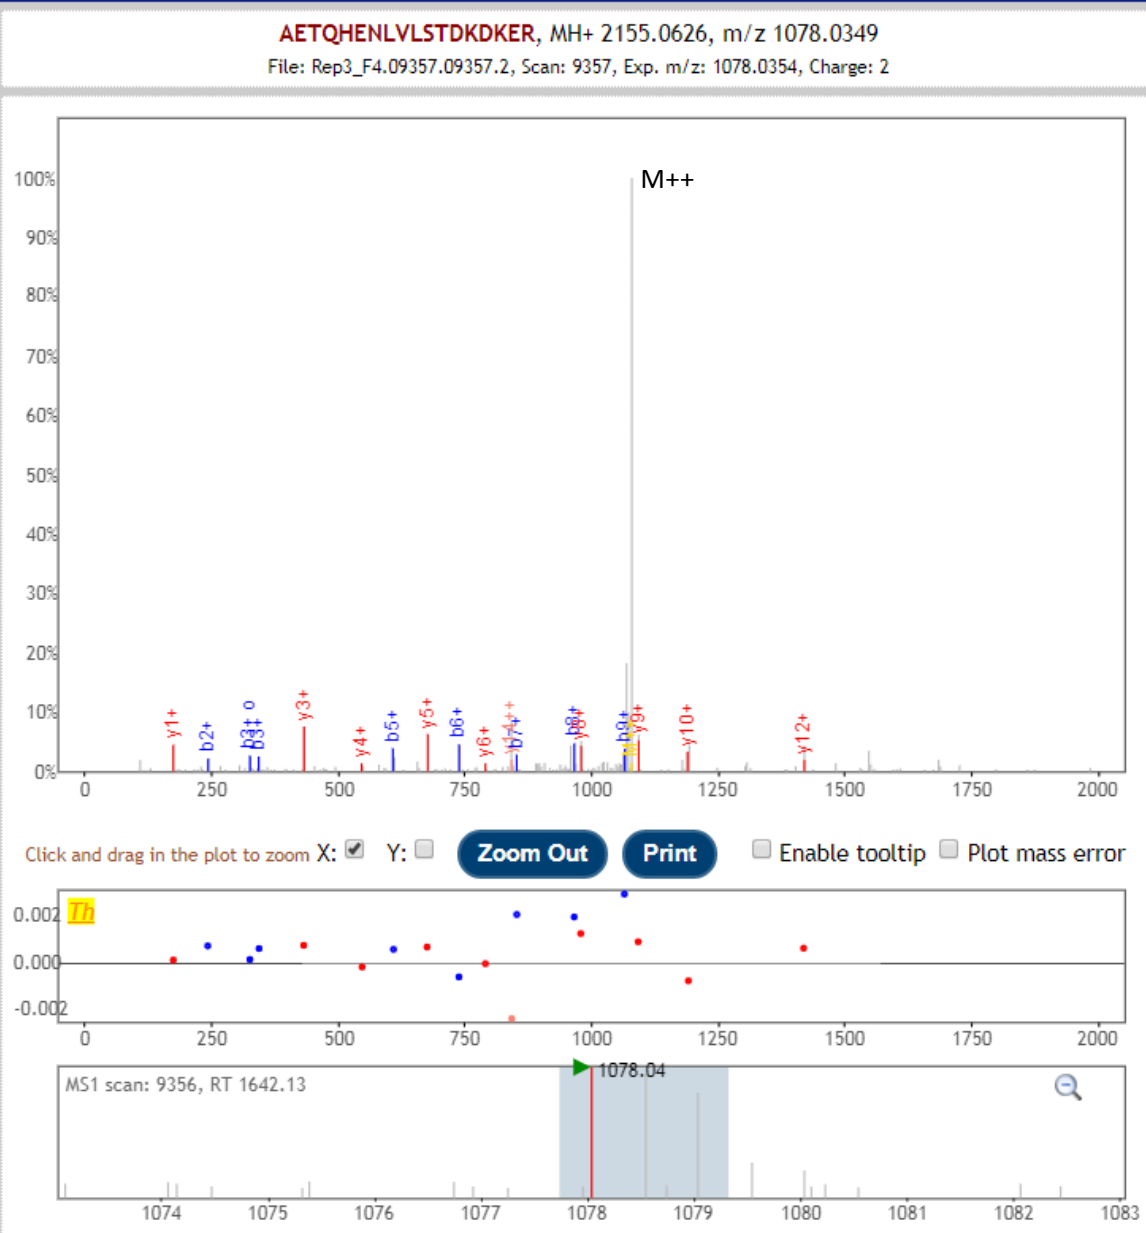

| b+        | #  | Seq # | y+        | y2+       |
|-----------|----|-------|-----------|-----------|
| 114.0550  | 1  | A 18  |           |           |
| 243.0975  | 2  | E 17  | 2042.0149 | 1021.5111 |
| 344.1452  | 3  | T 16  | 1912.9723 | 956.9898  |
| 472.2038  | 4  | Q 15  | 1811.9246 | 906.4659  |
| 609.2627  | 5  | H 14  | 1683.8660 | 842.4367  |
| 738.3053  | 6  | E 13  | 1546.8071 | 773.9072  |
| 852.3482  | 7  | N 12  | 1417.7645 | 709.3859  |
| 965.4323  | 8  | L 11  | 1303.7216 | 652.3644  |
| 1064.5007 | 9  | V 10  | 1190.6375 | 595.8224  |
| 1177.5848 | 10 | L 9   | 1091.5691 | 546.2882  |
| 1264.6168 | 11 | S 8   | 978.4851  | 489.7462  |
| 1365.6645 | 12 | T 7   | 891.4530  | 446.2302  |
| 1480.6914 | 13 | D 6   | 790.4054  | 395.7063  |
| 1608.7864 | 14 | K 5   | 675.3784  | 338.1928  |
| 1723.8133 | 15 | D 4   | 547.2835  | 274.1454  |
| 1851.9083 | 16 | K 3   | 432.2565  | 216.6319  |
| 1980.9509 | 17 | E 2   | 304.1615  | 152.5844  |
|           | 18 | R 1   | 175.1190  | 88.0631   |

[\[Click\]](#) to move table

Add to N-term: **42.010565**



| Gene           | Description              | Peptide with cleaved & acetylated PEXEL |
|----------------|--------------------------|-----------------------------------------|
| PBANKA_1003000 | liver specific protein 2 | RLI.AEKESENNSQDVK                       |

**Ions:**

a  1+  2+  3+

b  1+  2+  3+

c  1+  2+  3+

x  1+  2+  3+

y  1+  2+  3+

z  1+  2+  3+

[\[Deselect All\]](#)

**Neutral Loss:**

NH<sub>3</sub> (\*)

H<sub>2</sub>O (o)

H<sub>3</sub>PO<sub>4</sub> (p)

Immonium ions

Reporter ions

**Mass Type:**

Mono  Avg

Mass Tol:

Th  ppm

**Update**

**Peak Assignment:**

Most Intense

Nearest Match

Peak Detect

**Peak Labels:**

Ion  m/z

None

Width:

Height:

**AEKESENNSQDVK, MH+ 1963.8475, m/z 982.4274**

File: Rep2\_F1.02888.02888.2, Scan: 2888, Exp. m/z: 982.4281, Charge: 2

Click and drag in the plot to zoom X:  Y:  **Zoom Out** **Print**  Enable tooltip  Plot mass error

MS1 scan: 2881, RT 1127.51

| b+        | #  | Seq # | y+        |
|-----------|----|-------|-----------|
| 114.0550  | 1  | A 17  |           |
| 243.0975  | 2  | E 16  | 1850.7999 |
| 371.1925  | 3  | K 15  | 1721.7573 |
| 500.2351  | 4  | E 14  | 1593.6623 |
| 587.2671  | 5  | S 13  | 1464.6197 |
| 716.3097  | 6  | E 12  | 1377.5877 |
| 830.3527  | 7  | N 11  | 1248.5451 |
| 944.3956  | 8  | N 10  | 1134.5022 |
| 1031.4276 | 9  | S 9   | 1020.4592 |
| 1160.4702 | 10 | E 8   | 933.4272  |
| 1274.5131 | 11 | N 7   | 804.3846  |
| 1388.5561 | 12 | N 6   | 690.3417  |
| 1475.5881 | 13 | S 5   | 576.2988  |
| 1603.6467 | 14 | Q 4   | 489.2667  |
| 1718.6736 | 15 | D 3   | 361.2082  |
| 1817.7420 | 16 | V 2   | 246.1812  |
|           | 17 | K 1   | 147.1128  |

[\[Click\]](#) to move table

Add to N-term: **42.010565**

| Gene           | Description              | Peptide with cleaved & acetylated PEXEL |
|----------------|--------------------------|-----------------------------------------|
| PBANKA_1003000 | liver specific protein 2 | RLI.AEKESENNSQDVK                       |

**Ions:**

a  1<sup>+</sup>  2<sup>+</sup>  3<sup>+</sup>

b  1<sup>+</sup>  2<sup>+</sup>  3<sup>+</sup>

c  1<sup>+</sup>  2<sup>+</sup>  3<sup>+</sup>

x  1<sup>+</sup>  2<sup>+</sup>  3<sup>+</sup>

y  1<sup>+</sup>  2<sup>+</sup>  3<sup>+</sup>

z  1<sup>+</sup>  2<sup>+</sup>  3<sup>+</sup>

[\[Deselect All\]](#)

**Neutral Loss:**

NH<sub>3</sub> (\*)

H<sub>2</sub>O (o)

H<sub>3</sub>PO<sub>4</sub> (p)

Immonium ions

Reporter ions

**Mass Type:**

Mono  Avg

Mass Tol:

Th  ppm

**Update**

**Peak Assignment:**

Most Intense

Nearest Match

Peak Detect

**Peak Labels:**

Ion  m/z

None

Width:

Height:

**AEKESENNSQDVK, MH+ 1963.8475, m/z 982.4274**

File: Rep3\_F1.02837.02837.2, Scan: 2837, Exp. m/z: 982.429, Charge: 2

Click and drag in the plot to zoom X:  Y:  **Zoom Out** **Print**  Enable tooltip  Plot mass error

MS1 scan: 2834, RT 1134.47

| b+        | #  | Seq # | y+        | y2+      |
|-----------|----|-------|-----------|----------|
| 114.0550  | 1  | A 17  |           |          |
| 243.0975  | 2  | E 16  | 1850.7999 | 925.9036 |
| 371.1925  | 3  | K 15  | 1721.7573 | 861.3823 |
| 500.2351  | 4  | E 14  | 1593.6623 | 797.3348 |
| 587.2671  | 5  | S 13  | 1464.6197 | 732.8135 |
| 716.3097  | 6  | E 12  | 1377.5877 | 689.2975 |
| 830.3527  | 7  | N 11  | 1248.5451 | 624.7762 |
| 944.3956  | 8  | N 10  | 1134.5022 | 567.7547 |
| 1031.4276 | 9  | S 9   | 1020.4592 | 510.7333 |
| 1160.4702 | 10 | E 8   | 933.4272  | 467.2172 |
| 1274.5131 | 11 | N 7   | 804.3846  | 402.6959 |
| 1388.5561 | 12 | N 6   | 690.3417  | 345.6745 |
| 1475.5881 | 13 | S 5   | 576.2988  | 288.6530 |
| 1603.6467 | 14 | Q 4   | 489.2667  | 245.1370 |
| 1718.6736 | 15 | D 3   | 361.2082  | 181.1077 |
| 1817.7420 | 16 | V 2   | 246.1812  | 123.5942 |
|           | 17 | K 1   | 147.1128  | 74.0600  |

[\[Click\]](#) to move table

Add to N-term: **42.010565**

| Gene           | Description              | Peptide with cleaved & acetylated PEXEL |
|----------------|--------------------------|-----------------------------------------|
| PBANKA_1003000 | liver specific protein 2 | RLI.AEKESENSENNSQDVKQDK                 |

**Ions:**

a  1+  2+  3+

b  1+  2+  3+

c  1+  2+  3+

x  1+  2+  3+

y  1+  2+  3+

z  1+  2+  3+

[\[Deselect All\]](#)

**Neutral Loss:**

NH<sub>3</sub> (\*)

H<sub>2</sub>O (o)

H<sub>3</sub>PO<sub>4</sub> (p)

Immonium ions

Reporter ions

**Mass Type:**

Mono  Avg

Mass Tol:

Th  ppm

**Update**

**Peak Assignment:**

Most Intense

Nearest Match

Peak Detect

**Peak Labels:**

Ion  m/z

None

Width:

Height:

**AEKESENSENNSQDVKQDK**, MH+ 2335.0280, m/z 779.0142

File: Rep2\_F3.03100.03100.3, Scan: 3100, Exp. m/z: 779.0142, Charge: 3

Click and drag in the plot to zoom X:  Y:  **Zoom Out** **Print**  Enable tooltip  Plot mass error

MS1 scan: 3092, RT 1009.99

| b+        | b2+       | #  | Seq | #  | y+        | y2+       | y3+      |
|-----------|-----------|----|-----|----|-----------|-----------|----------|
| 114.0550  | 57.5311   | 1  | A   | 20 |           |           |          |
| 243.0975  | 122.0524  | 2  | E   | 19 | 2221.9804 | 1111.4938 | 741.3316 |
| 371.1925  | 186.0999  | 3  | K   | 18 | 2092.9378 | 1046.9725 | 698.3174 |
| 500.2351  | 250.6212  | 4  | E   | 17 | 1964.8428 | 982.9250  | 655.6191 |
| 587.2671  | 294.1372  | 5  | S   | 16 | 1835.8002 | 918.4037  | 612.6049 |
| 716.3097  | 358.6585  | 6  | E   | 15 | 1748.7682 | 874.8877  | 583.5942 |
| 830.3527  | 415.6800  | 7  | N   | 14 | 1619.7256 | 810.3664  | 540.5800 |
| 944.3956  | 472.7014  | 8  | N   | 13 | 1505.6827 | 753.3450  | 502.5657 |
| 1031.4276 | 516.2174  | 9  | S   | 12 | 1391.6397 | 696.3235  | 464.5514 |
| 1160.4702 | 580.7387  | 10 | E   | 11 | 1304.6077 | 652.8075  | 435.5408 |
| 1274.5131 | 637.7602  | 11 | N   | 10 | 1175.5651 | 588.2862  | 392.5266 |
| 1388.5561 | 694.7817  | 12 | N   | 9  | 1061.5222 | 531.2647  | 354.5122 |
| 1475.5881 | 738.2977  | 13 | S   | 8  | 947.4793  | 474.2433  | 316.4979 |
| 1603.6467 | 802.3270  | 14 | Q   | 7  | 860.4472  | 430.7272  | 287.4873 |
| 1718.6736 | 859.8404  | 15 | D   | 6  | 732.3886  | 366.6980  | 244.8011 |
| 1817.7420 | 909.3746  | 16 | V   | 5  | 617.3617  | 309.1845  | 206.4588 |
| 1945.8370 | 973.4221  | 17 | K   | 4  | 518.2933  | 259.6503  | 173.4359 |
| 2073.8956 | 1037.4514 | 18 | Q   | 3  | 390.1983  | 195.6028  | 130.7376 |
| 2188.9225 | 1094.9649 | 19 | D   | 2  | 262.1397  | 131.5735  | 88.0514  |
|           |           | 20 | K   | 1  | 147.1128  | 74.0600   | 49.7091  |

[\[Click\]](#) to move table

Add to N-term: **42.010565**

| Gene           | Description              | Peptide with cleaved & acetylated PEXEL |
|----------------|--------------------------|-----------------------------------------|
| PBANKA_1003000 | liver specific protein 2 | RLI.AEKESENNSQDVKQDK                    |

**Ions:**

a  1+  2+  3+

b  1+  2+  3+

c  1+  2+  3+

x  1+  2+  3+

y  1+  2+  3+

z  1+  2+  3+

[\[Deselect All\]](#)

**Neutral Loss:**

NH<sub>3</sub> (\*)

H<sub>2</sub>O (o)

H<sub>3</sub>PO<sub>4</sub> (p)

Immonium ions

Reporter ions

**Mass Type:**

Mono  Avg

Mass Tol:

Th  ppm

**Update**

**Peak Assignment:**

Most Intense

Nearest Match

Peak Detect

**Peak Labels:**

Ion  m/z

None

Width:

Height:

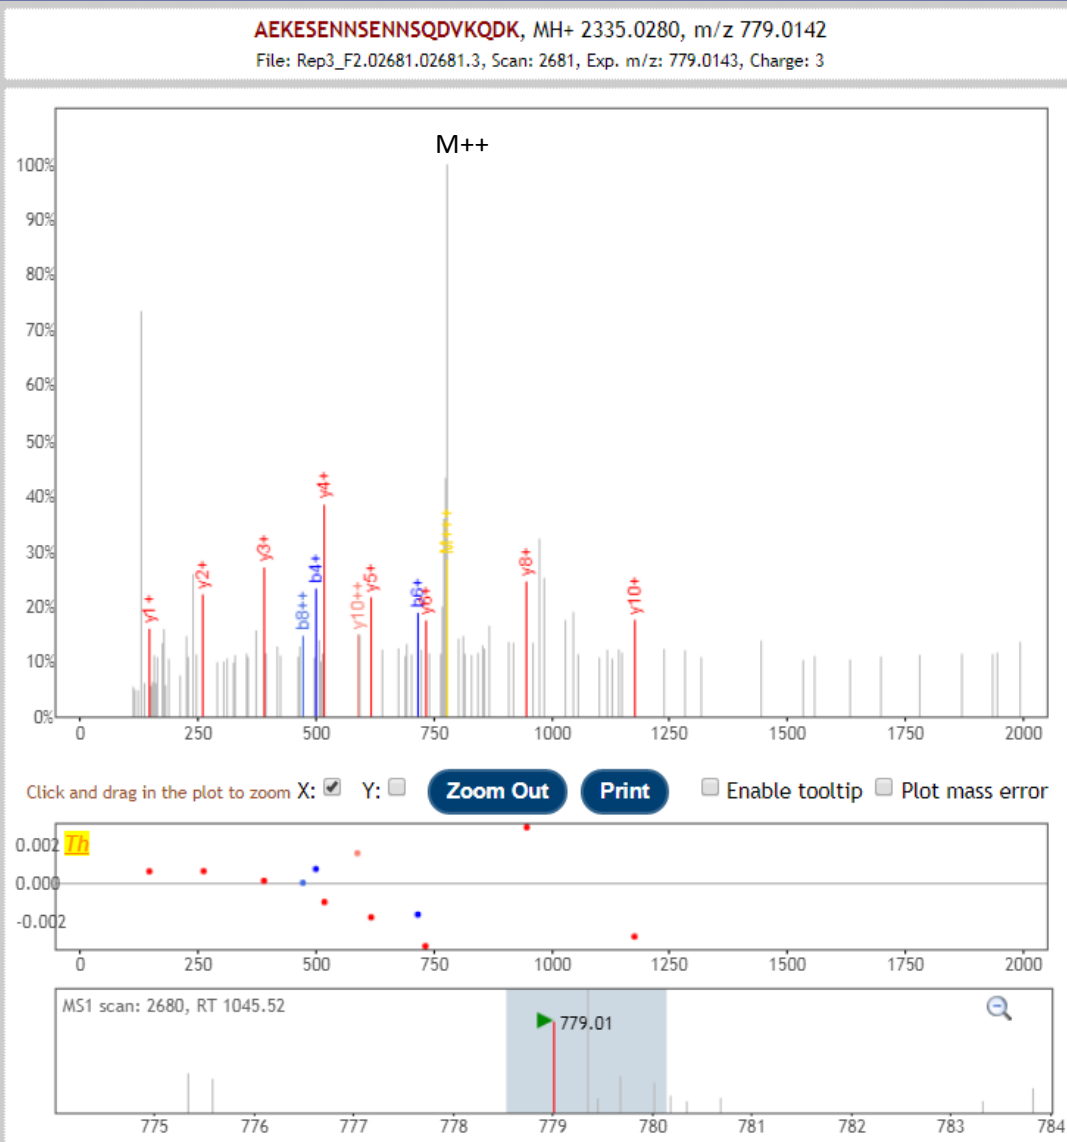

| b+        | b2+       | #  | Seq | #  | y+        | y2+       |
|-----------|-----------|----|-----|----|-----------|-----------|
| 114.0550  | 57.5311   | 1  | A   | 20 |           |           |
| 243.0975  | 122.0524  | 2  | E   | 19 | 2221.9804 | 1111.4938 |
| 371.1925  | 186.0999  | 3  | K   | 18 | 2092.9378 | 1046.9725 |
| 500.2351  | 250.6212  | 4  | E   | 17 | 1964.8428 | 982.9250  |
| 587.2671  | 294.1372  | 5  | S   | 16 | 1835.8002 | 918.4037  |
| 716.3097  | 358.6585  | 6  | E   | 15 | 1748.7682 | 874.8877  |
| 830.3527  | 415.6800  | 7  | N   | 14 | 1619.7256 | 810.3664  |
| 944.3956  | 472.7014  | 8  | N   | 13 | 1505.6827 | 753.3450  |
| 1031.4276 | 516.2174  | 9  | S   | 12 | 1391.6397 | 696.3235  |
| 1160.4702 | 580.7387  | 10 | E   | 11 | 1304.6077 | 652.8075  |
| 1274.5131 | 637.7602  | 11 | N   | 10 | 1175.5651 | 588.2862  |
| 1388.5561 | 694.7817  | 12 | N   | 9  | 1061.5222 | 531.2647  |
| 1475.5881 | 738.2977  | 13 | S   | 8  | 947.4793  | 474.2433  |
| 1603.6467 | 802.3270  | 14 | Q   | 7  | 860.4472  | 430.7272  |
| 1718.6736 | 859.8404  | 15 | D   | 6  | 732.3886  | 366.6980  |
| 1817.7420 | 909.3746  | 16 | V   | 5  | 617.3617  | 309.1845  |
| 1945.8370 | 973.4221  | 17 | K   | 4  | 518.2933  | 259.6503  |
| 2073.8956 | 1037.4514 | 18 | Q   | 3  | 390.1983  | 195.6028  |
| 2188.9225 | 1094.9649 | 19 | D   | 2  | 262.1397  | 131.5735  |
|           |           | 20 | K   | 1  | 147.1128  | 74.0600   |

[\[Click\]](#) to move table

Add to N-term: **42.010565**

| Gene           | Description              | Peptide with cleaved & acetylated PEXEL   |
|----------------|--------------------------|-------------------------------------------|
| PBANKA_1003000 | liver specific protein 2 | RLI.AEKESNNSENNSENNSENNSENNSENNSENNSSQDVK |

**Ions:**

a  1<sup>+</sup>  2<sup>+</sup>  3<sup>+</sup>

b  1<sup>+</sup>  2<sup>+</sup>  3<sup>+</sup>

c  1<sup>+</sup>  2<sup>+</sup>  3<sup>+</sup>

x  1<sup>+</sup>  2<sup>+</sup>  3<sup>+</sup>

y  1<sup>+</sup>  2<sup>+</sup>  3<sup>+</sup>

z  1<sup>+</sup>  2<sup>+</sup>  3<sup>+</sup>

[\[Deselect All\]](#)

**Neutral Loss:**

NH<sub>3</sub> (\*)

H<sub>2</sub>O (o)

H<sub>3</sub>PO<sub>4</sub> (p)

Immonium ions

Reporter ions

**Mass Type:**

Mono  Avg

Mass Tol:

Th  ppm

**Update**

**Peak Assignment:**

Most Intense

Nearest Match

Peak Detect

**Peak Labels:**

Ion  m/z

None

Width:

Height:

**AEKESNNSENNSENNSENNSENNSENNSSQDVK, MH+ 4184.6499, m/z 1046.9179**

File: Rep2\_F1.03633.03633.4, Scan: 3633, Exp. m/z: 1046.9175, Charge: 4

Click and drag in the plot to zoom X:  Y:  **Zoom Out** **Print**  Enable tooltip  Plot mass error

MS1 scan: 3630, RT 1263.72

| b+        | b2+       | #  | Seq | #  | y+        |
|-----------|-----------|----|-----|----|-----------|
| 114.0550  | 57.5311   | 1  | A   | 37 |           |
| 243.0975  | 122.0524  | 2  | E   | 36 | 4071.6023 |
| 371.1925  | 186.0999  | 3  | K   | 35 | 3942.5597 |
| 500.2351  | 250.6212  | 4  | E   | 34 | 3814.4647 |
| 587.2671  | 294.1372  | 5  | S   | 33 | 3685.4221 |
| 716.3097  | 358.6585  | 6  | E   | 32 | 3598.3901 |
| 830.3527  | 415.6800  | 7  | N   | 31 | 3469.3475 |
| 944.3956  | 472.7014  | 8  | N   | 30 | 3355.3046 |
| 1031.4276 | 516.2174  | 9  | S   | 29 | 3241.2616 |
| 1160.4702 | 580.7387  | 10 | E   | 28 | 3154.2296 |
| 1274.5131 | 637.7602  | 11 | N   | 27 | 3025.1870 |
| 1388.5561 | 694.7817  | 12 | N   | 26 | 2911.1441 |
| 1475.5881 | 738.2977  | 13 | S   | 25 | 2797.1011 |
| 1604.6307 | 802.8190  | 14 | E   | 24 | 2710.0691 |
| 1718.6736 | 859.8404  | 15 | N   | 23 | 2581.0265 |
| 1832.7165 | 916.8619  | 16 | N   | 22 | 2466.9836 |
| 1919.7486 | 960.3779  | 17 | S   | 21 | 2352.9407 |
| 2048.7912 | 1024.8992 | 18 | E   | 20 | 2265.9086 |
| 2162.8341 | 1081.9207 | 19 | N   | 19 | 2136.8661 |
| 2276.8770 | 1138.9421 | 20 | N   | 18 | 2022.8231 |
| 2363.9090 | 1182.4582 | 21 | S   | 17 | 1908.7802 |
| 2492.9516 | 1246.9795 | 22 | E   | 16 | 1821.7482 |
| 2606.9946 | 1304.0009 | 23 | N   | 15 | 1692.7056 |
| 2721.0375 | 1361.0224 | 24 | N   | 14 | 1578.6626 |
| 2808.0695 | 1404.5384 | 25 | S   | 13 | 1464.6197 |
| 2937.1121 | 1469.0597 | 26 | E   | 12 | 1377.5877 |
| 3051.1550 | 1526.0812 | 27 | N   | 11 | 1248.5451 |
| 3165.1980 | 1583.1026 | 28 | N   | 10 | 1134.5022 |
| 3252.2300 | 1626.6186 | 29 | S   | 9  | 1020.4592 |
| 3381.2726 | 1691.1399 | 30 | E   | 8  | 933.4272  |
| 3495.3155 | 1748.1614 | 31 | N   | 7  | 804.3846  |
| 3609.3584 | 1805.1829 | 32 | N   | 6  | 690.3417  |
| 3696.3905 | 1848.6989 | 33 | S   | 5  | 576.2988  |
| 3824.4490 | 1912.7282 | 34 | Q   | 4  | 489.2667  |
| 3939.4760 | 1970.2416 | 35 | D   | 3  | 361.2082  |
| 4038.5444 | 2019.7758 | 36 | V   | 2  | 246.1812  |
|           |           | 37 | K   | 1  | 147.1128  |

[\[Click\]](#) to move table

Add to N-term: 42.010565

| Gene           | Description              | Peptide with cleaved & acetylated PEXEL            |
|----------------|--------------------------|----------------------------------------------------|
| PBANKA_1003000 | liver specific protein 2 | RLI.AEKESENSENSENSENSENSENSENSENSENSENSENSENNSQDVK |

**Ions:**

a  1<sup>+</sup>  2<sup>+</sup>  3<sup>+</sup>

b  1<sup>+</sup>  2<sup>+</sup>  3<sup>+</sup>

c  1<sup>+</sup>  2<sup>+</sup>  3<sup>+</sup>

x  1<sup>+</sup>  2<sup>+</sup>  3<sup>+</sup>

y  1<sup>+</sup>  2<sup>+</sup>  3<sup>+</sup>

z  1<sup>+</sup>  2<sup>+</sup>  3<sup>+</sup>

[\[Deselect All\]](#)

**Neutral Loss:**

NH<sub>3</sub> (\*)

H<sub>2</sub>O (o)

H<sub>3</sub>PO<sub>4</sub> (p)

Immonium ions

Reporter ions

**Mass Type:**

Mono  Avg

Mass Tol:

Th  ppm

[Update](#)

**Peak Assignment:**

Most Intense

Nearest Match

Peak Detect

**Peak Labels:**

Ion  m/z

None

Width:

Height:

**AEKESENSENSENSENSENSENSENSENSENSENSENNSQDVK**, MH+ 4184.6499, m/z 1046.9179

File: Rep3\_F1.03554.03554.4, Scan: 3554, Exp. m/z: 1046.9181, Charge: 4

Click and drag in the plot to zoom X:  Y:  [Zoom Out](#) [Print](#)  Enable tooltip  Plot mass error

MS1 scan: 3551, RT 1266.47

| b+        | b2+       | #  | Seq | #  | y+        |
|-----------|-----------|----|-----|----|-----------|
| 114.0550  | 57.5311   | 1  | A   | 37 |           |
| 243.0975  | 122.0524  | 2  | E   | 36 | 4071.6023 |
| 371.1925  | 186.0999  | 3  | K   | 35 | 3942.5597 |
| 500.2351  | 250.6212  | 4  | E   | 34 | 3814.4647 |
| 587.2671  | 294.1372  | 5  | S   | 33 | 3685.4221 |
| 716.3097  | 358.6585  | 6  | E   | 32 | 3598.3901 |
| 830.3527  | 415.6800  | 7  | N   | 31 | 3469.3475 |
| 944.3956  | 472.7014  | 8  | N   | 30 | 3355.3046 |
| 1031.4276 | 516.2174  | 9  | S   | 29 | 3241.2616 |
| 1160.4702 | 580.7387  | 10 | E   | 28 | 3154.2296 |
| 1274.5131 | 637.7602  | 11 | N   | 27 | 3025.1870 |
| 1388.5561 | 694.7817  | 12 | N   | 26 | 2911.1441 |
| 1475.5881 | 738.2977  | 13 | S   | 25 | 2797.1011 |
| 1604.6307 | 802.8190  | 14 | E   | 24 | 2710.0691 |
| 1718.6736 | 859.8404  | 15 | N   | 23 | 2581.0265 |
| 1832.7165 | 916.8619  | 16 | N   | 22 | 2466.9836 |
| 1919.7486 | 960.3779  | 17 | S   | 21 | 2352.9407 |
| 2048.7912 | 1024.8992 | 18 | E   | 20 | 2265.9086 |
| 2162.8341 | 1081.9207 | 19 | N   | 19 | 2136.8661 |
| 2276.8770 | 1138.9421 | 20 | N   | 18 | 2022.8231 |
| 2363.9090 | 1182.4582 | 21 | S   | 17 | 1908.7802 |
| 2492.9516 | 1246.9795 | 22 | E   | 16 | 1821.7482 |
| 2606.9946 | 1304.0009 | 23 | N   | 15 | 1692.7056 |
| 2721.0375 | 1361.0224 | 24 | N   | 14 | 1578.6626 |
| 2808.0695 | 1404.5384 | 25 | S   | 13 | 1464.6197 |
| 2937.1121 | 1469.0597 | 26 | E   | 12 | 1377.5877 |
| 3051.1550 | 1526.0812 | 27 | N   | 11 | 1248.5451 |
| 3165.1980 | 1583.1026 | 28 | N   | 10 | 1134.5022 |
| 3252.2300 | 1626.6186 | 29 | S   | 9  | 1020.4592 |
| 3381.2726 | 1691.1399 | 30 | E   | 8  | 933.4272  |
| 3495.3155 | 1748.1614 | 31 | N   | 7  | 804.3846  |
| 3609.3584 | 1805.1829 | 32 | N   | 6  | 690.3417  |
| 3696.3905 | 1848.6989 | 33 | S   | 5  | 576.2988  |
| 3824.4490 | 1912.7282 | 34 | Q   | 4  | 489.2667  |
| 3939.4760 | 1970.2416 | 35 | D   | 3  | 361.2082  |
| 4038.5444 | 2019.7758 | 36 | V   | 2  | 246.1812  |
|           |           | 37 | K   | 1  | 147.1128  |

[\[Click\]](#) to move table

Add to N-term: 42.010565

| Gene           | Description              | Peptide with cleaved & acetylated PEXEL |
|----------------|--------------------------|-----------------------------------------|
| PBANKA_1003000 | liver specific protein 2 | RLI.AEKESENNSENSENSENSENSENSENSENNSQDVK |

- Ions:
- a  1+  2+  3+
  - b  1+  2+  3+
  - c  1+  2+  3+
  - x  1+  2+  3+
  - y  1+  2+  3+
  - z  1+  2+  3+

- Neutral Loss:
- NH<sub>3</sub> (\*)
  - H<sub>2</sub>O (o)
  - H<sub>3</sub>PO<sub>4</sub> (p)
  - Immonium ions
  - Reporter ions

- Mass Type:
- Mono  Avg
- Mass Tol:
- Th  ppm
- Update**

- Peak Assignment:
- Most Intense
  - Nearest Match
  - Peak Detect

- Peak Labels:
- Ion  m/z
  - None

Width:

Height:

**AEKESENNSENSENSENSENSENSENNSQDVK**, MH+ 3740.4895, m/z 935.8778

File: Rep3\_F1.03447.03447.4, Scan: 3447, Exp. m/z: 935.879, Charge: 4

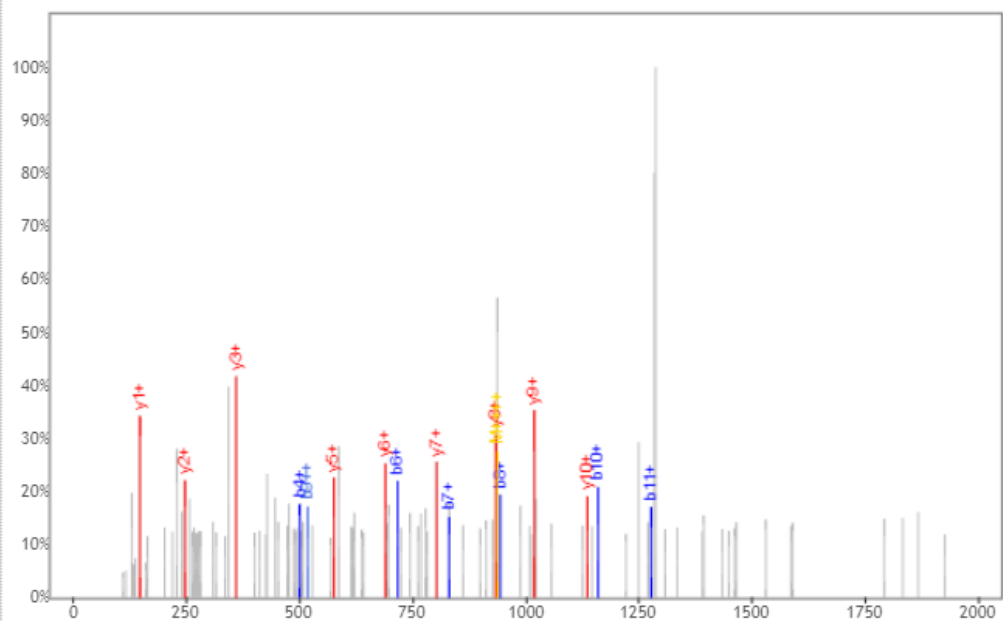

Click and drag in the plot to zoom X:  Y:  **Zoom Out** **Print**  Enable tooltip  Plot mass error

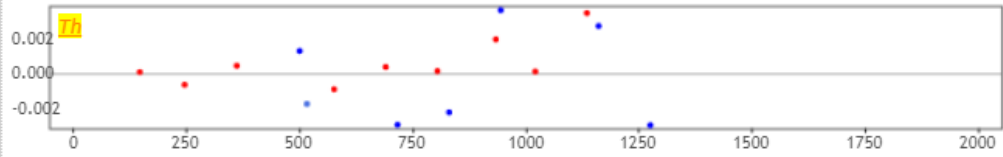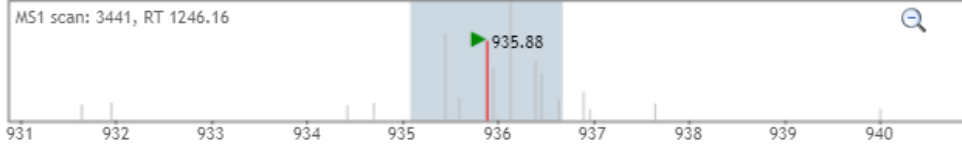

| b+               | b2+             | #  | Seq | #  | y+               |
|------------------|-----------------|----|-----|----|------------------|
| 114.0550         | 57.5311         | 1  | A   | 33 |                  |
| 243.0975         | 122.0524        | 2  | E   | 32 | 3627.4418        |
| 371.1925         | 186.0999        | 3  | K   | 31 | 3498.3992        |
| <b>500.2351</b>  | 250.6212        | 4  | E   | 30 | 3370.3042        |
| 587.2671         | 294.1372        | 5  | S   | 29 | 3241.2616        |
| <b>716.3097</b>  | 358.6585        | 6  | E   | 28 | 3154.2296        |
| <b>830.3527</b>  | 415.6800        | 7  | N   | 27 | 3025.1870        |
| <b>944.3956</b>  | 472.7014        | 8  | N   | 26 | 2911.1441        |
| 1031.4276        | <b>516.2174</b> | 9  | S   | 25 | 2797.1011        |
| <b>1160.4702</b> | 580.7387        | 10 | E   | 24 | 2710.0691        |
| <b>1274.5131</b> | 637.7602        | 11 | N   | 23 | 2581.0265        |
| 1388.5561        | 694.7817        | 12 | N   | 22 | 2466.9836        |
| 1475.5881        | 738.2977        | 13 | S   | 21 | 2352.9407        |
| 1604.6307        | 802.8190        | 14 | E   | 20 | 2265.9086        |
| 1718.6736        | 859.8404        | 15 | N   | 19 | 2136.8661        |
| 1832.7165        | 916.8619        | 16 | N   | 18 | 2022.8231        |
| 1919.7486        | 960.3779        | 17 | S   | 17 | 1908.7802        |
| 2048.7912        | 1024.8992       | 18 | E   | 16 | 1821.7482        |
| 2162.8341        | 1081.9207       | 19 | N   | 15 | 1692.7056        |
| 2276.8770        | 1138.9421       | 20 | N   | 14 | 1578.6626        |
| 2363.9090        | 1182.4582       | 21 | S   | 13 | 1464.6197        |
| 2492.9516        | 1246.9795       | 22 | E   | 12 | 1377.5877        |
| 2606.9946        | 1304.0009       | 23 | N   | 11 | 1248.5451        |
| 2721.0375        | 1361.0224       | 24 | N   | 10 | <b>1134.5022</b> |
| 2808.0695        | 1404.5384       | 25 | S   | 9  | <b>1020.4592</b> |
| 2937.1121        | 1469.0597       | 26 | E   | 8  | <b>933.4272</b>  |
| 3051.1550        | 1526.0812       | 27 | N   | 7  | <b>804.3846</b>  |
| 3165.1980        | 1583.1026       | 28 | N   | 6  | <b>690.3417</b>  |
| 3252.2300        | 1626.6186       | 29 | S   | 5  | <b>576.2988</b>  |
| 3380.2886        | 1690.6479       | 30 | Q   | 4  | 489.2667         |
| 3495.3155        | 1748.1614       | 31 | D   | 3  | <b>361.2082</b>  |
| 3594.3839        | 1797.6956       | 32 | V   | 2  | <b>246.1812</b>  |
|                  |                 | 33 | K   | 1  | <b>147.1128</b>  |

[\[Click\]](#) to move table  
Add to N-term: 42.010565

| Gene           | Description              | Peptide with cleaved & acetylated PEXEL |
|----------------|--------------------------|-----------------------------------------|
| PBANKA_1003000 | liver specific protein 2 | RLI.AEKESENNSENSENSENSENSENSENSENNSQDVK |

**Ions:**

a  1<sup>+</sup>  2<sup>+</sup>  3<sup>+</sup>

b  1<sup>+</sup>  2<sup>+</sup>  3<sup>+</sup>

c  1<sup>+</sup>  2<sup>+</sup>  3<sup>+</sup>

x  1<sup>+</sup>  2<sup>+</sup>  3<sup>+</sup>

y  1<sup>+</sup>  2<sup>+</sup>  3<sup>+</sup>

z  1<sup>+</sup>  2<sup>+</sup>  3<sup>+</sup>

[\[Deselect All\]](#)

**Neutral Loss:**

NH<sub>3</sub> (\*)

H<sub>2</sub>O (o)

H<sub>3</sub>PO<sub>4</sub> (p)

Immonium ions

Reporter ions

**Mass Type:**

Mono  Avg

Mass Tol:

Th  ppm

**Update**

**Peak Assignment:**

Most Intense

Nearest Match

Peak Detect

**Peak Labels:**

Ion  m/z

None

Width:

Height:

**AEKESENNSENSENSENSENSENSENSENNSQDVK, MH+ 3740.4895, m/z 935.8778**

File: Rep3\_F1.03447.03447.4, Scan: 3447, Exp. m/z: 935.879, Charge: 4

Click and drag in the plot to zoom X:  Y:  **Zoom Out** **Print**  Enable tooltip  Plot mass error

MS1 scan: 3441, RT 1246.16

| b+        | b2+       | #  | Seq | #  | y+        |
|-----------|-----------|----|-----|----|-----------|
| 114.0550  | 57.5311   | 1  | A   | 33 |           |
| 243.0975  | 122.0524  | 2  | E   | 32 | 3627.4418 |
| 371.1925  | 186.0999  | 3  | K   | 31 | 3498.3992 |
| 500.2351  | 250.6212  | 4  | E   | 30 | 3370.3042 |
| 587.2671  | 294.1372  | 5  | S   | 29 | 3241.2616 |
| 716.3097  | 358.6585  | 6  | E   | 28 | 3154.2296 |
| 830.3527  | 415.6800  | 7  | N   | 27 | 3025.1870 |
| 944.3956  | 472.7014  | 8  | N   | 26 | 2911.1441 |
| 1031.4276 | 516.2174  | 9  | S   | 25 | 2797.1011 |
| 1160.4702 | 580.7387  | 10 | E   | 24 | 2710.0691 |
| 1274.5131 | 637.7602  | 11 | N   | 23 | 2581.0265 |
| 1388.5561 | 694.7817  | 12 | N   | 22 | 2466.9836 |
| 1475.5881 | 738.2977  | 13 | S   | 21 | 2352.9407 |
| 1604.6307 | 802.8190  | 14 | E   | 20 | 2265.9086 |
| 1718.6736 | 859.8404  | 15 | N   | 19 | 2136.8661 |
| 1832.7165 | 916.8619  | 16 | N   | 18 | 2022.8231 |
| 1919.7486 | 960.3779  | 17 | S   | 17 | 1908.7802 |
| 2048.7912 | 1024.8992 | 18 | E   | 16 | 1821.7482 |
| 2162.8341 | 1081.9207 | 19 | N   | 15 | 1692.7056 |
| 2276.8770 | 1138.9421 | 20 | N   | 14 | 1578.6626 |
| 2363.9090 | 1182.4582 | 21 | S   | 13 | 1464.6197 |
| 2492.9516 | 1246.9795 | 22 | E   | 12 | 1377.5877 |
| 2606.9946 | 1304.0009 | 23 | N   | 11 | 1248.5451 |
| 2721.0375 | 1361.0224 | 24 | N   | 10 | 1134.5022 |
| 2808.0695 | 1404.5384 | 25 | S   | 9  | 1020.4592 |
| 2937.1121 | 1469.0597 | 26 | E   | 8  | 933.4272  |
| 3051.1550 | 1526.0812 | 27 | N   | 7  | 804.3846  |
| 3165.1980 | 1583.1026 | 28 | N   | 6  | 690.3417  |
| 3252.2300 | 1626.6186 | 29 | S   | 5  | 576.2988  |
| 3380.2886 | 1690.6479 | 30 | Q   | 4  | 489.2667  |
| 3495.3155 | 1748.1614 | 31 | D   | 3  | 361.2082  |
| 3594.3839 | 1797.6956 | 32 | V   | 2  | 246.1812  |
|           |           | 33 | K   | 1  | 147.1128  |

[\[Click\]](#) to move table

Add to N-term: 42.010565



| Gene           | Description              | Peptide with cleaved & acetylated PEXEL |
|----------------|--------------------------|-----------------------------------------|
| PBANKA_1003000 | liver specific protein 2 | RLI.AEKESENSENSENSENNSQDVK              |

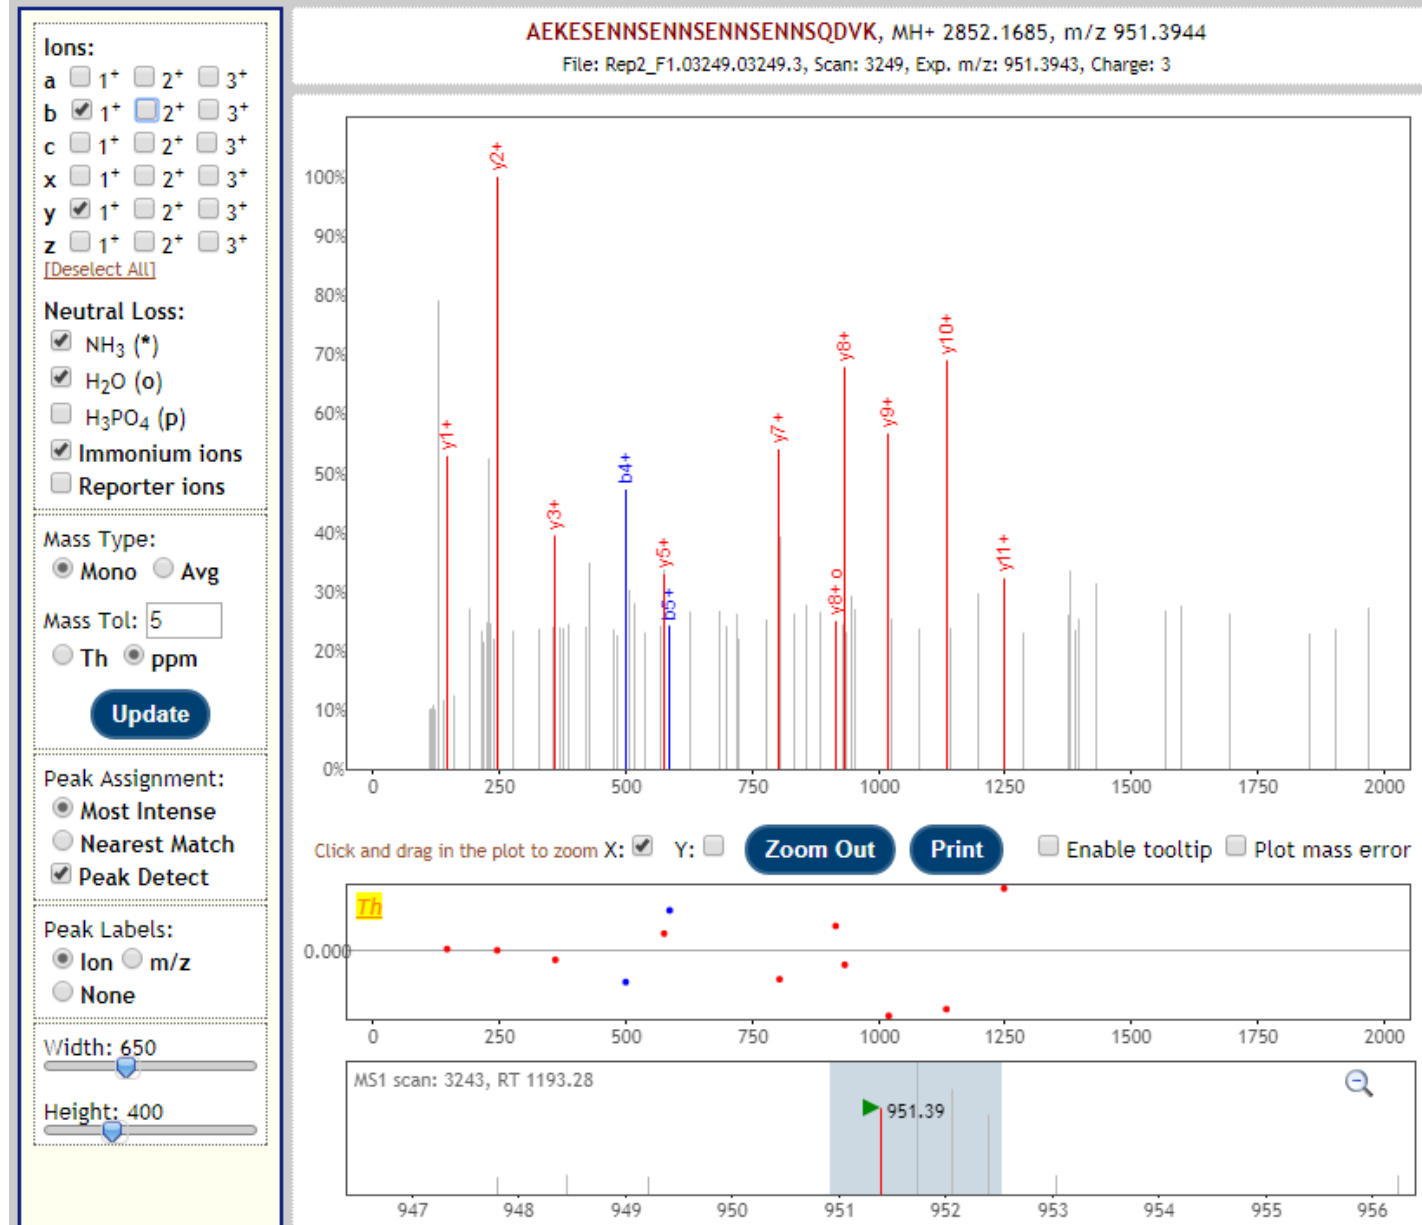

- Ions:**
- a  1+  2+  3+
- b  1+  2+  3+
- c  1+  2+  3+
- x  1+  2+  3+
- y  1+  2+  3+
- z  1+  2+  3+
- [\[Deselect All\]](#)
- Neutral Loss:**
- NH<sub>3</sub> (\*)
- H<sub>2</sub>O (o)
- H<sub>3</sub>PO<sub>4</sub> (p)
- Immonium ions
- Reporter ions
- Mass Type:**
- Mono  Avg
- Mass Tol:
- Th  ppm
- Update**
- Peak Assignment:**
- Most Intense
- Nearest Match
- Peak Detect
- Peak Labels:**
- Ion  m/z
- None
- Width:
- Height:

| b+        | #  | Seq | #  | y+        |
|-----------|----|-----|----|-----------|
| 114.0550  | 1  | A   | 25 |           |
| 243.0975  | 2  | E   | 24 | 2739.1208 |
| 371.1925  | 3  | K   | 23 | 2610.0782 |
| 500.2351  | 4  | E   | 22 | 2481.9833 |
| 587.2671  | 5  | S   | 21 | 2352.9407 |
| 716.3097  | 6  | E   | 20 | 2265.9086 |
| 830.3527  | 7  | N   | 19 | 2136.8661 |
| 944.3956  | 8  | N   | 18 | 2022.8231 |
| 1031.4276 | 9  | S   | 17 | 1908.7802 |
| 1160.4702 | 10 | E   | 16 | 1821.7482 |
| 1274.5131 | 11 | N   | 15 | 1692.7056 |
| 1388.5561 | 12 | N   | 14 | 1578.6626 |
| 1475.5881 | 13 | S   | 13 | 1464.6197 |
| 1604.6307 | 14 | E   | 12 | 1377.5877 |
| 1718.6736 | 15 | N   | 11 | 1248.5451 |
| 1832.7165 | 16 | N   | 10 | 1134.5022 |
| 1919.7486 | 17 | S   | 9  | 1020.4592 |
| 2048.7912 | 18 | E   | 8  | 933.4272  |
| 2162.8341 | 19 | N   | 7  | 804.3846  |
| 2276.8770 | 20 | N   | 6  | 690.3417  |
| 2363.9090 | 21 | S   | 5  | 576.2988  |
| 2491.9676 | 22 | Q   | 4  | 489.2667  |
| 2606.9946 | 23 | D   | 3  | 361.2082  |
| 2706.0630 | 24 | V   | 2  | 246.1812  |
|           | 25 | K   | 1  | 147.1128  |

[\[Click\]](#) to move table

Add to N-term: 42.010565

| Gene           | Description              | Peptide with cleaved & acetylated PEXEL |
|----------------|--------------------------|-----------------------------------------|
| PBANKA_1003000 | liver specific protein 2 | RLI.AEKESENNSENNSQDVK                   |

**Ions:**

a  1+  2+  3+

b  1+  2+  3+

c  1+  2+  3+

x  1+  2+  3+

y  1+  2+  3+

z  1+  2+  3+

[\[Deselect All\]](#)

**Neutral Loss:**

NH<sub>3</sub> (\*)

H<sub>2</sub>O (o)

H<sub>3</sub>PO<sub>4</sub> (p)

Immonium ions

Reporter ions

**Mass Type:**

Mono  Avg

Mass Tol:

Th  ppm

**Update**

**Peak Assignment:**

Most Intense

Nearest Match

Peak Detect

**Peak Labels:**

Ion  m/z

None

Width:

Height:

**AEKESENNSENNSQDVK, MH+ 2408.0080, m/z 803.3409**

File: Rep2\_F1.03090.03090.3, Scan: 3090, Exp. m/z: 803.3412, Charge: 3

Click and drag in the plot to zoom X:  Y:  **Zoom Out** **Print**  Enable tooltip  Plot mass error

MS1 scan: 3086, RT 1164.65

| b+        | b2+       | #  | Seq | #  | y+        |
|-----------|-----------|----|-----|----|-----------|
| 114.0550  | 57.5311   | 1  | A   | 21 |           |
| 243.0975  | 122.0524  | 2  | E   | 20 | 2294.9603 |
| 371.1925  | 186.0999  | 3  | K   | 19 | 2165.9178 |
| 500.2351  | 250.6212  | 4  | E   | 18 | 2037.8228 |
| 587.2671  | 294.1372  | 5  | S   | 17 | 1908.7802 |
| 716.3097  | 358.6585  | 6  | E   | 16 | 1821.7482 |
| 830.3527  | 415.6800  | 7  | N   | 15 | 1692.7056 |
| 944.3956  | 472.7014  | 8  | N   | 14 | 1578.6626 |
| 1031.4276 | 516.2174  | 9  | S   | 13 | 1464.6197 |
| 1160.4702 | 580.7387  | 10 | E   | 12 | 1377.5877 |
| 1274.5131 | 637.7602  | 11 | N   | 11 | 1248.5451 |
| 1388.5561 | 694.7817  | 12 | N   | 10 | 1134.5022 |
| 1475.5881 | 738.2977  | 13 | S   | 9  | 1020.4592 |
| 1604.6307 | 802.8190  | 14 | E   | 8  | 933.4272  |
| 1718.6736 | 859.8404  | 15 | N   | 7  | 804.3846  |
| 1832.7165 | 916.8619  | 16 | N   | 6  | 690.3417  |
| 1919.7486 | 960.3779  | 17 | S   | 5  | 576.2988  |
| 2047.8071 | 1024.4072 | 18 | Q   | 4  | 489.2667  |
| 2162.8341 | 1081.9207 | 19 | D   | 3  | 361.2082  |
| 2261.9025 | 1131.4549 | 20 | V   | 2  | 246.1812  |
|           |           | 21 | K   | 1  | 147.1128  |

[\[Click\]](#) to move table

Add to N-term: 42.010565

| Gene           | Description                               | Peptide with cleaved & acetylated PEXEL |
|----------------|-------------------------------------------|-----------------------------------------|
| PBANKA_1328000 | serine/threonine protein phosphatase UIS2 | RVL.QEQNEDIKDDNDEGDEEYYSYLK             |

**Ions:**

a  1+  2+  3+

b  1+  2+  3+

c  1+  2+  3+

x  1+  2+  3+

y  1+  2+  3+

z  1+  2+  3+

[\[Deselect All\]](#)

**Neutral Loss:**

NH<sub>3</sub> (\*)

H<sub>2</sub>O (o)

H<sub>3</sub>PO<sub>4</sub> (p)

Immonium ions

Reporter ions

**Mass Type:**

Mono  Avg

Mass Tol:

Th  ppm

**Update**

**Peak Assignment:**

Most Intense

Nearest Match

Peak Detect

**Peak Labels:**

Ion  m/z

None

Width:

Height:

**QEQNEDIKDDNDEGDEEYYSYLK, MH+ 3483.3626, m/z 1161.7924**

File: Rep1\_F1.37845.37845.3, Scan: 37845, Exp. m/z: 1161.7933, Charge: 3

Click and drag in the plot to zoom X:  Y:  **Zoom Out** **Print**  Enable tooltip  Plot mass error

MS1 scan: 37842, RT 6693.86

| b+        | #  | Seq | #  | y+        |
|-----------|----|-----|----|-----------|
| 171.0764  | 1  | Q   | 28 |           |
| 300.1190  | 2  | E   | 27 | 3313.2935 |
| 428.1776  | 3  | Q   | 26 | 3184.2509 |
| 542.2205  | 4  | N   | 25 | 3056.1923 |
| 671.2631  | 5  | E   | 24 | 2942.1494 |
| 786.2901  | 6  | D   | 23 | 2813.1068 |
| 899.3741  | 7  | I   | 22 | 2698.0799 |
| 1027.4691 | 8  | K   | 21 | 2584.9958 |
| 1142.4960 | 9  | D   | 20 | 2456.9008 |
| 1257.5230 | 10 | D   | 19 | 2341.8739 |
| 1371.5659 | 11 | N   | 18 | 2226.8469 |
| 1486.5928 | 12 | D   | 17 | 2112.8040 |
| 1615.6354 | 13 | E   | 16 | 1997.7771 |
| 1729.6784 | 14 | N   | 15 | 1868.7345 |
| 1844.7053 | 15 | D   | 14 | 1754.6915 |
| 1973.7479 | 16 | E   | 13 | 1639.6646 |
| 2030.7694 | 17 | G   | 12 | 1510.6220 |
| 2145.7963 | 18 | D   | 11 | 1453.6005 |
| 2274.8389 | 19 | E   | 10 | 1338.5736 |
| 2403.8815 | 20 | E   | 9  | 1209.5310 |
| 2518.9084 | 21 | D   | 8  | 1080.4884 |
| 2647.9510 | 22 | E   | 7  | 965.4615  |
| 2811.0144 | 23 | Y   | 6  | 836.4189  |
| 2974.0777 | 24 | Y   | 5  | 673.3556  |
| 3061.1097 | 25 | S   | 4  | 510.2922  |
| 3224.1730 | 26 | Y   | 3  | 423.2602  |
| 3337.2571 | 27 | L   | 2  | 260.1969  |
|           | 28 | K   | 1  | 147.1128  |

[\[Click\]](#) to move table

Add to N-term: 42.010565

| Gene           | Description                               | Peptide with cleaved & acetylated PEXEL |
|----------------|-------------------------------------------|-----------------------------------------|
| PBANKA_1328000 | serine/threonine protein phosphatase UIS2 | RVL.QEQNEDIKDDNDENDEGDEEDEYYSYLK        |

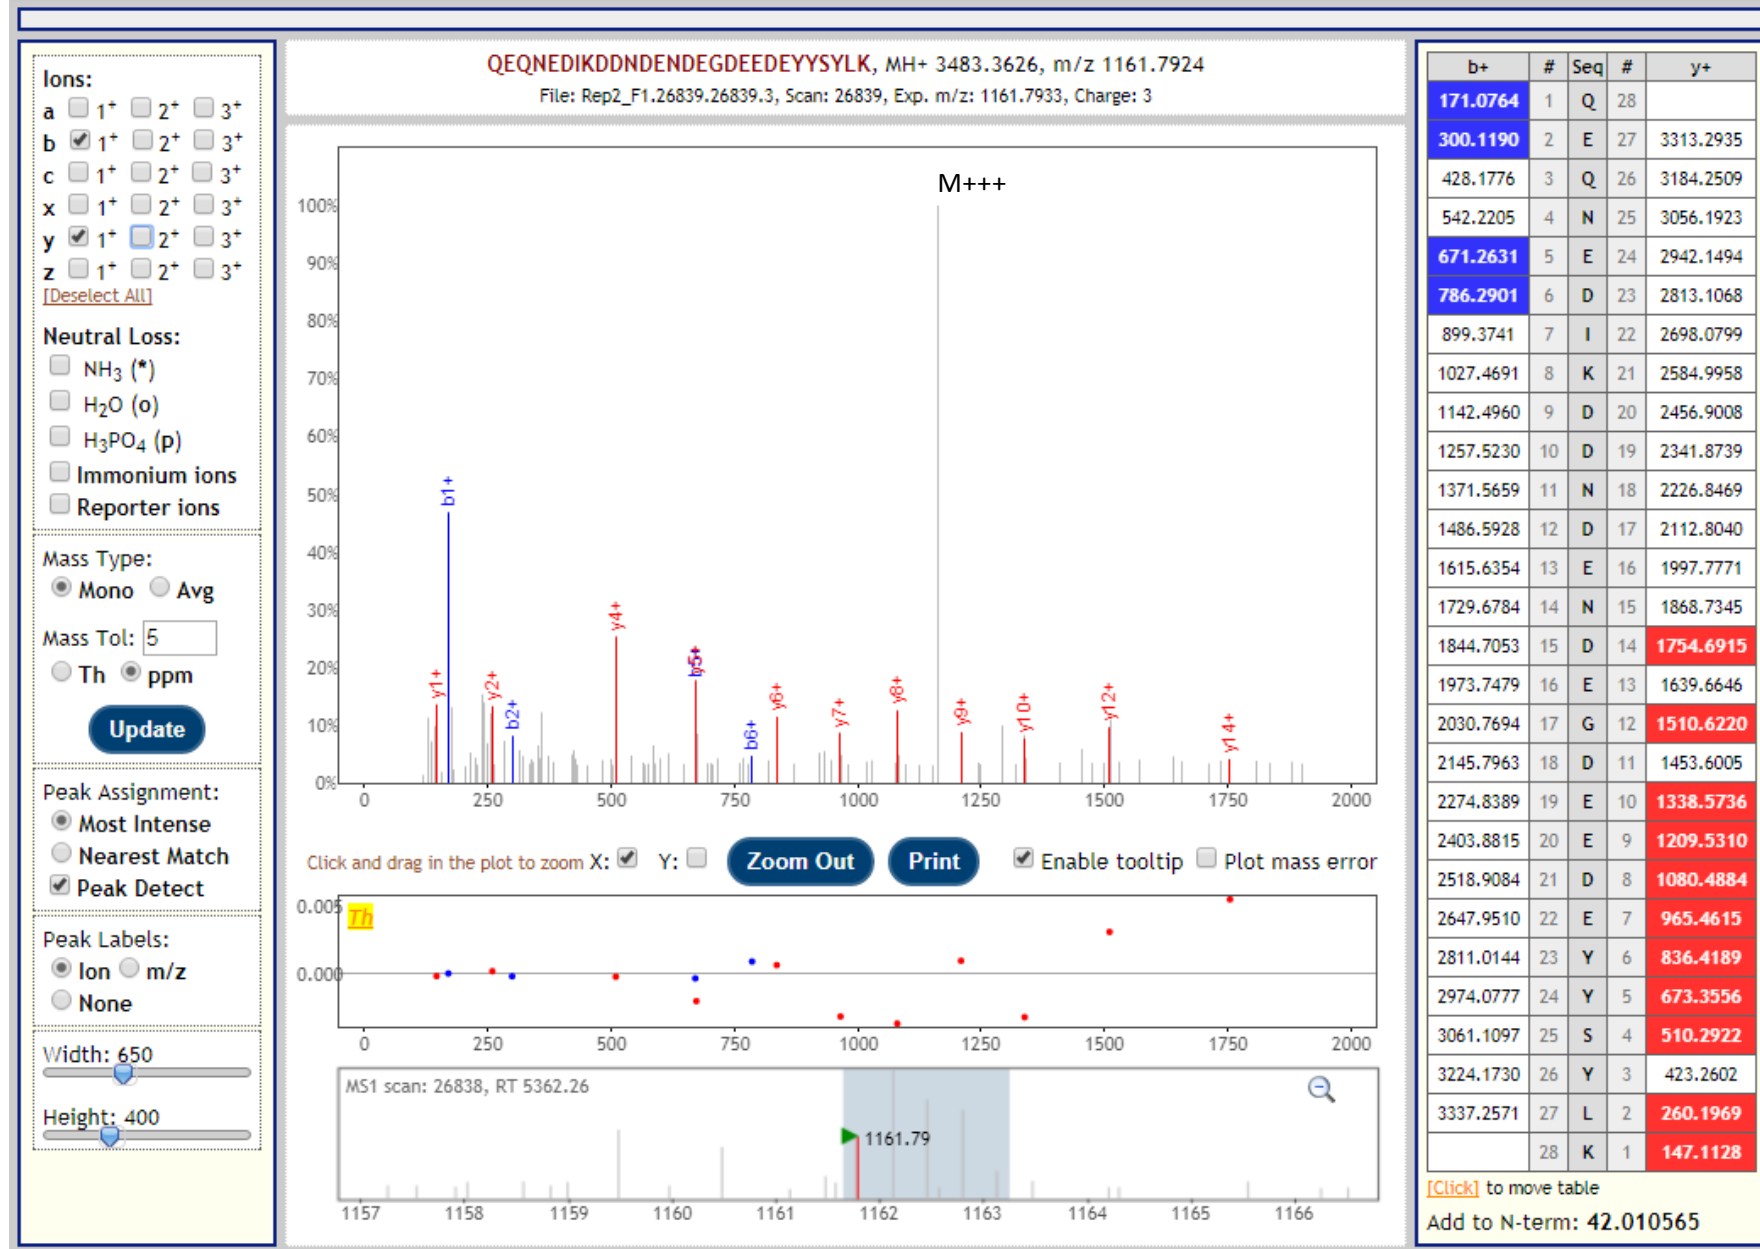

| Gene           | Description                               | Peptide with cleaved & acetylated PEXEL |
|----------------|-------------------------------------------|-----------------------------------------|
| PBANKA_1328000 | serine/threonine protein phosphatase UIS2 | RVL.QEQNEDIKDDNDENDEGDEEDEYYSYLK        |

**Ions:**

a  1<sup>+</sup>  2<sup>+</sup>  3<sup>+</sup>

b  1<sup>+</sup>  2<sup>+</sup>  3<sup>+</sup>

c  1<sup>+</sup>  2<sup>+</sup>  3<sup>+</sup>

x  1<sup>+</sup>  2<sup>+</sup>  3<sup>+</sup>

y  1<sup>+</sup>  2<sup>+</sup>  3<sup>+</sup>

z  1<sup>+</sup>  2<sup>+</sup>  3<sup>+</sup>

[\[Deselect All\]](#)

**Neutral Loss:**

NH<sub>3</sub> (\*)

H<sub>2</sub>O (o)

H<sub>3</sub>PO<sub>4</sub> (p)

Immonium ions

Reporter ions

**Mass Type:**

Mono  Avg

Mass Tol:

Th  ppm

**Update**

**Peak Assignment:**

Most Intense

Nearest Match

Peak Detect

**Peak Labels:**

Ion  m/z

None

Width:

Height:

**QEQNEDIKDDNDENDEGDEEDEYYSYLK, MH+ 3483.3626, m/z 1161.7924**

File: Rep3\_F1.27306.27306.3, Scan: 27306, Exp. m/z: 1161.7917, Charge: 3

Click and drag in the plot to zoom X:  Y:  **Zoom Out** **Print**  Enable tooltip  Plot mass error

MS1 scan: 27294, RT 5283.16

| b+        | b2+       | #  | Seq | #  | y+        | y2+       |
|-----------|-----------|----|-----|----|-----------|-----------|
| 171.0764  | 86.0418   | 1  | Q   | 28 |           |           |
| 300.1190  | 150.5631  | 2  | E   | 27 | 3313.2935 | 1657.1504 |
| 428.1776  | 214.5924  | 3  | Q   | 26 | 3184.2509 | 1592.6291 |
| 542.2205  | 271.6139  | 4  | N   | 25 | 3056.1923 | 1528.5998 |
| 671.2631  | 336.1352  | 5  | E   | 24 | 2942.1494 | 1471.5783 |
| 786.2901  | 393.6487  | 6  | D   | 23 | 2813.1068 | 1407.0570 |
| 899.3741  | 450.1907  | 7  | I   | 22 | 2698.0799 | 1349.5436 |
| 1027.4691 | 514.2382  | 8  | K   | 21 | 2584.9958 | 1293.0015 |
| 1142.4960 | 571.7516  | 9  | D   | 20 | 2456.9008 | 1228.9541 |
| 1257.5230 | 629.2651  | 10 | D   | 19 | 2341.8739 | 1171.4406 |
| 1371.5659 | 686.2866  | 11 | N   | 18 | 2226.8469 | 1113.9271 |
| 1486.5928 | 743.8001  | 12 | D   | 17 | 2112.8040 | 1056.9056 |
| 1615.6354 | 808.3214  | 13 | E   | 16 | 1997.7771 | 999.3922  |
| 1729.6784 | 865.3428  | 14 | N   | 15 | 1868.7345 | 934.8709  |
| 1844.7053 | 922.8563  | 15 | D   | 14 | 1754.6915 | 877.8494  |
| 1973.7479 | 987.3776  | 16 | E   | 13 | 1639.6646 | 820.3359  |
| 2030.7694 | 1015.8883 | 17 | G   | 12 | 1510.6220 | 755.8146  |
| 2145.7963 | 1073.4018 | 18 | D   | 11 | 1453.6005 | 727.3039  |
| 2274.8389 | 1137.9231 | 19 | E   | 10 | 1338.5736 | 669.7904  |
| 2403.8815 | 1202.4444 | 20 | E   | 9  | 1209.5310 | 605.2691  |
| 2518.9084 | 1259.9579 | 21 | D   | 8  | 1080.4884 | 540.7478  |
| 2647.9510 | 1324.4791 | 22 | E   | 7  | 965.4615  | 483.2344  |
| 2811.0144 | 1406.0108 | 23 | Y   | 6  | 836.4189  | 418.7131  |
| 2974.0777 | 1487.5425 | 24 | Y   | 5  | 673.3556  | 337.1814  |
| 3061.1097 | 1531.0585 | 25 | S   | 4  | 510.2922  | 255.6498  |
| 3224.1730 | 1612.5902 | 26 | Y   | 3  | 423.2602  | 212.1337  |
| 3337.2571 | 1669.1322 | 27 | L   | 2  | 260.1969  | 130.6021  |
|           |           | 28 | K   | 1  | 147.1128  | 74.0600   |

[\[Click\]](#) to move table

Add to N-term: 42.010565

| Gene           | Description            | Peptide with cleaved & acetylated PEXEL |
|----------------|------------------------|-----------------------------------------|
| PBANKA_1365500 | exported protein IBIS1 | RIL.SELDQNKDQNLGYK                      |

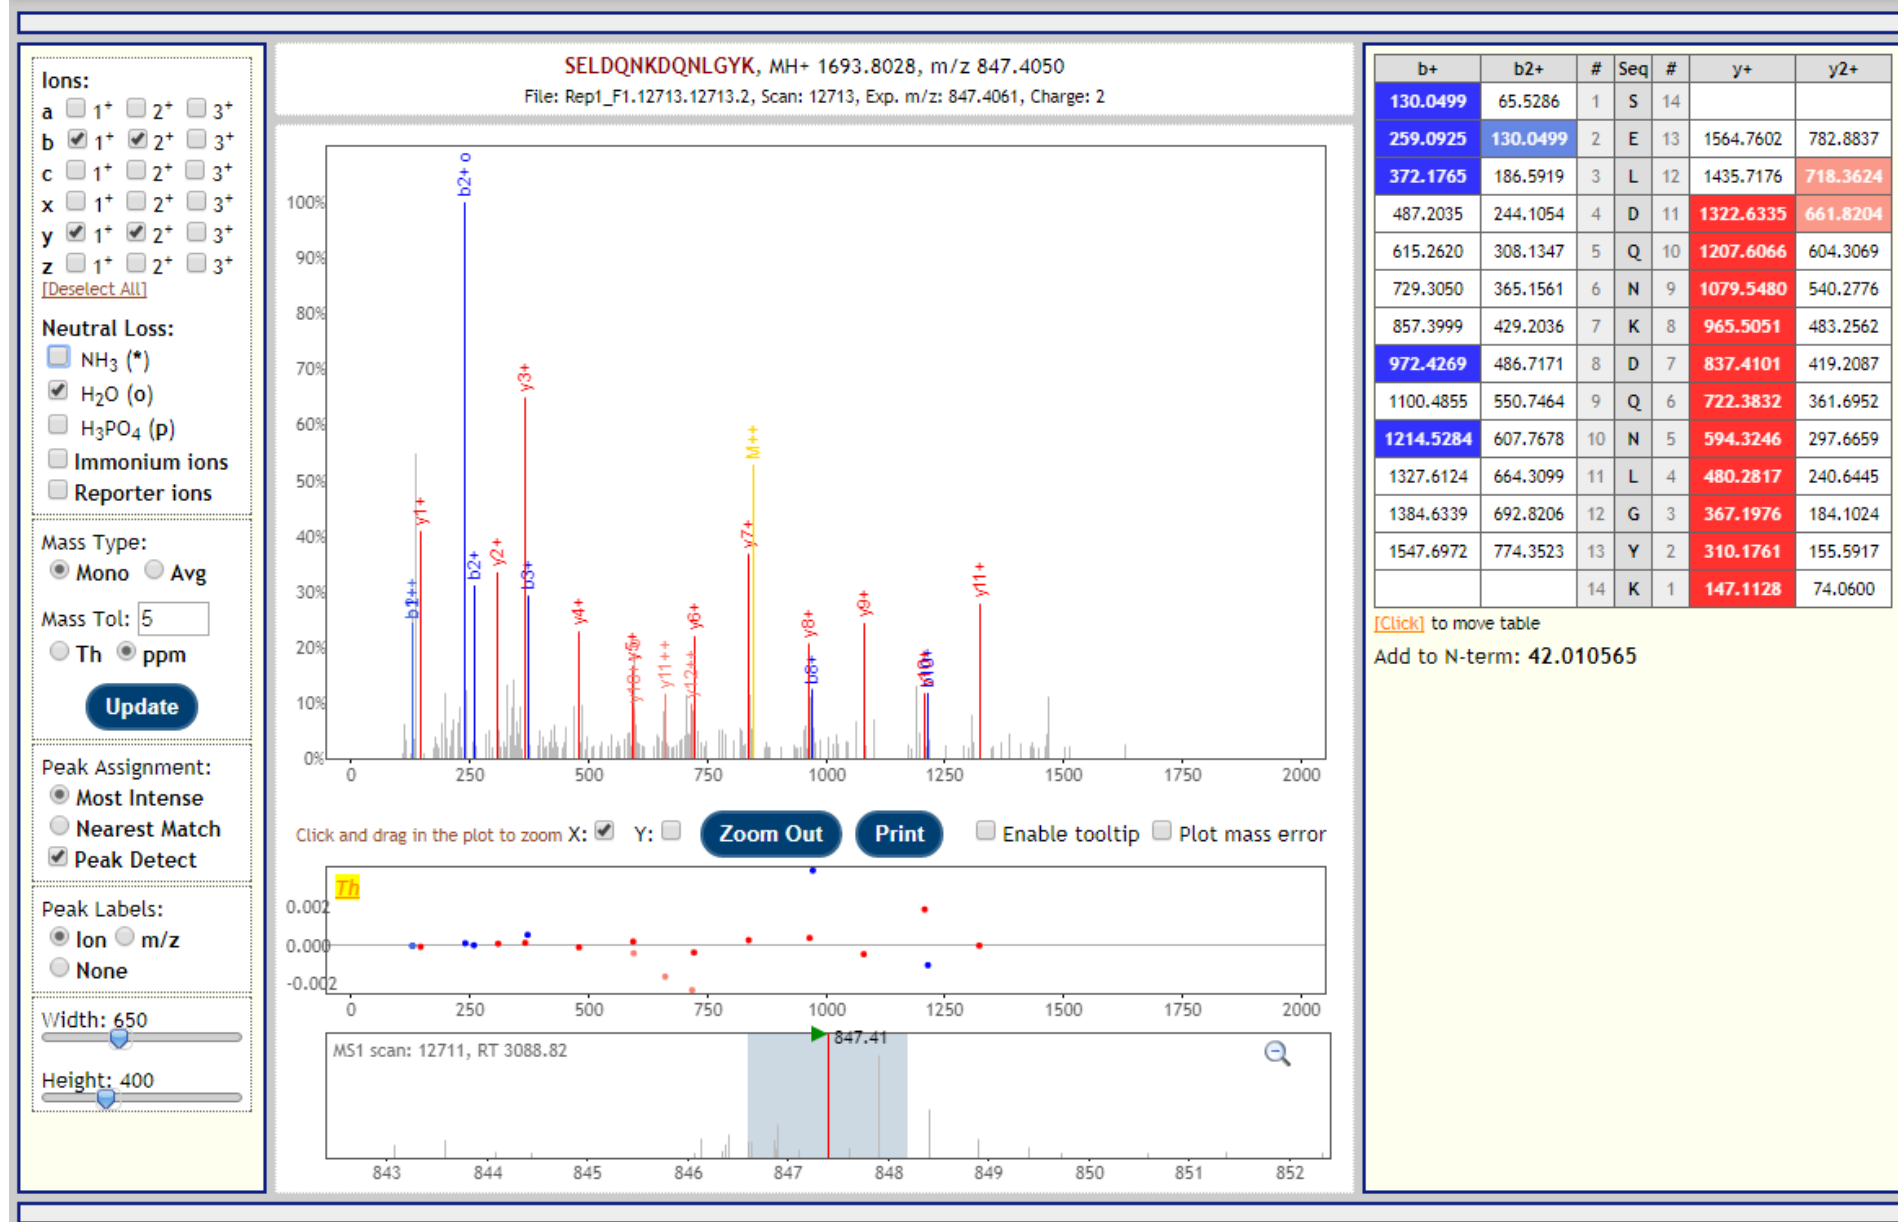

| Gene           | Description            | Peptide with cleaved & acetylated PEXEL |
|----------------|------------------------|-----------------------------------------|
| PBANKA_1365500 | exported protein IBIS1 | RIL.SELDQNKDQNLGYK                      |

**Ions:**

a  1<sup>+</sup>  2<sup>+</sup>  3<sup>+</sup>

b  1<sup>+</sup>  2<sup>+</sup>  3<sup>+</sup>

c  1<sup>+</sup>  2<sup>+</sup>  3<sup>+</sup>

x  1<sup>+</sup>  2<sup>+</sup>  3<sup>+</sup>

y  1<sup>+</sup>  2<sup>+</sup>  3<sup>+</sup>

z  1<sup>+</sup>  2<sup>+</sup>  3<sup>+</sup>

[\[Deselect All\]](#)

**Neutral Loss:**

NH<sub>3</sub> (\*)

H<sub>2</sub>O (o)

H<sub>3</sub>PO<sub>4</sub> (p)

Immonium ions

Reporter ions

**Mass Type:**

Mono  Avg

Mass Tol:

Th  ppm

**Update**

**Peak Assignment:**

Most Intense

Nearest Match

Peak Detect

**Peak Labels:**

Ion  m/z

None

Width:

Height:

**SELDQNKDQNLGYK, MH+ 1693.8028, m/z 847.4050**

File: Rep2\_F1.09217.09217.2, Scan: 9217, Exp. m/z: 847.405, Charge: 2

Click and drag in the plot to zoom X:  Y:  **Zoom Out** **Print**  Enable tooltip  Plot mass error

| b+        | b2+      | #  | Seq | #  | y+        | y2+      |
|-----------|----------|----|-----|----|-----------|----------|
| 130.0499  | 65.5286  | 1  | S   | 14 |           |          |
| 259.0925  | 130.0499 | 2  | E   | 13 | 1564.7602 | 782.8837 |
| 372.1765  | 186.5919 | 3  | L   | 12 | 1435.7176 | 718.3624 |
| 487.2035  | 244.1054 | 4  | D   | 11 | 1322.6335 | 661.8204 |
| 615.2620  | 308.1347 | 5  | Q   | 10 | 1207.6066 | 604.3069 |
| 729.3050  | 365.1561 | 6  | N   | 9  | 1079.5480 | 540.2776 |
| 857.3999  | 429.2036 | 7  | K   | 8  | 965.5051  | 483.2562 |
| 972.4269  | 486.7171 | 8  | D   | 7  | 837.4101  | 419.2087 |
| 1100.4855 | 550.7464 | 9  | Q   | 6  | 722.3832  | 361.6952 |
| 1214.5284 | 607.7678 | 10 | N   | 5  | 594.3246  | 297.6659 |
| 1327.6124 | 664.3099 | 11 | L   | 4  | 480.2817  | 240.6445 |
| 1384.6339 | 692.8206 | 12 | G   | 3  | 367.1976  | 184.1024 |
| 1547.6972 | 774.3523 | 13 | Y   | 2  | 310.1761  | 155.5917 |
|           |          | 14 | K   | 1  | 147.1128  | 74.0600  |

[\[Click\]](#) to move table

Add to N-term: 42.010565

| Gene           | Description            | Peptide with cleaved & acetylated PEXEL |
|----------------|------------------------|-----------------------------------------|
| PBANKA_1365500 | exported protein IBIS1 | RIL.SELDQNKDQNLGYK                      |

**Ions:**

a  1<sup>+</sup>  2<sup>+</sup>  3<sup>+</sup>

b  1<sup>+</sup>  2<sup>+</sup>  3<sup>+</sup>

c  1<sup>+</sup>  2<sup>+</sup>  3<sup>+</sup>

x  1<sup>+</sup>  2<sup>+</sup>  3<sup>+</sup>

y  1<sup>+</sup>  2<sup>+</sup>  3<sup>+</sup>

z  1<sup>+</sup>  2<sup>+</sup>  3<sup>+</sup>

[\[Deselect All\]](#)

**Neutral Loss:**

NH<sub>3</sub> (\*)

H<sub>2</sub>O (o)

H<sub>3</sub>PO<sub>4</sub> (p)

Immonium ions

Reporter ions

**Mass Type:**

Mono  Avg

Mass Tol:

Th  ppm

**Update**

**Peak Assignment:**

Most Intense

Nearest Match

Peak Detect

**Peak Labels:**

Ion  m/z

None

Width:

Height:

**SELDQNKDQNLGYK, MH+ 1693.8028, m/z 847.4050**

File: Rep3\_F2.10217.10217.2, Scan: 10217, Exp. m/z: 847.407, Charge: 2

Click and drag in the plot to zoom X:  Y:  **Zoom Out** **Print**  Enable tooltip  Plot mass error

MS1 scan: 102110, RT 2212.64

| b+        | b2+      | #  | Seq # | y+        | y2+      |
|-----------|----------|----|-------|-----------|----------|
| 130.0499  | 65.5286  | 1  | S 14  |           |          |
| 259.0925  | 130.0499 | 2  | E 13  | 1564.7602 | 782.8837 |
| 372.1765  | 186.5919 | 3  | L 12  | 1435.7176 | 718.3624 |
| 487.2035  | 244.1054 | 4  | D 11  | 1322.6335 | 661.8204 |
| 615.2620  | 308.1347 | 5  | Q 10  | 1207.6066 | 604.3069 |
| 729.3050  | 365.1561 | 6  | N 9   | 1079.5480 | 540.2776 |
| 857.3999  | 429.2036 | 7  | K 8   | 965.5051  | 483.2562 |
| 972.4269  | 486.7171 | 8  | D 7   | 837.4101  | 419.2087 |
| 1100.4855 | 550.7464 | 9  | Q 6   | 722.3832  | 361.6952 |
| 1214.5284 | 607.7678 | 10 | N 5   | 594.3246  | 297.6659 |
| 1327.6124 | 664.3099 | 11 | L 4   | 480.2817  | 240.6445 |
| 1384.6339 | 692.8206 | 12 | G 3   | 367.1976  | 184.1024 |
| 1547.6972 | 774.3523 | 13 | Y 2   | 310.1761  | 155.5917 |
|           |          | 14 | K 1   | 147.1128  | 74.0600  |

[\[Click\]](#) to move table

Add to N-term: **42.010565**



| Gene           | Description   | Peptide with cleaved & acetylated PEXEL |
|----------------|---------------|-----------------------------------------|
| PBANKA_1465000 | fam-c protein | RSL.SEHSTEDKEETVTISDNK                  |

**Ions:**

a  1<sup>+</sup>  2<sup>+</sup>  3<sup>+</sup>

b  1<sup>+</sup>  2<sup>+</sup>  3<sup>+</sup>

c  1<sup>+</sup>  2<sup>+</sup>  3<sup>+</sup>

x  1<sup>+</sup>  2<sup>+</sup>  3<sup>+</sup>

y  1<sup>+</sup>  2<sup>+</sup>  3<sup>+</sup>

z  1<sup>+</sup>  2<sup>+</sup>  3<sup>+</sup>

[\[Deselect All\]](#)

**Neutral Loss:**

NH<sub>3</sub> (\*)

H<sub>2</sub>O (o)

H<sub>3</sub>PO<sub>4</sub> (p)

Immonium ions

Reporter ions

**Mass Type:**

Mono  Avg

Mass Tol:

Th  ppm

**Update**

**Peak Assignment:**

Most Intense

Nearest Match

Peak Detect

**Peak Labels:**

Ion  m/z

None

Width:

Height:

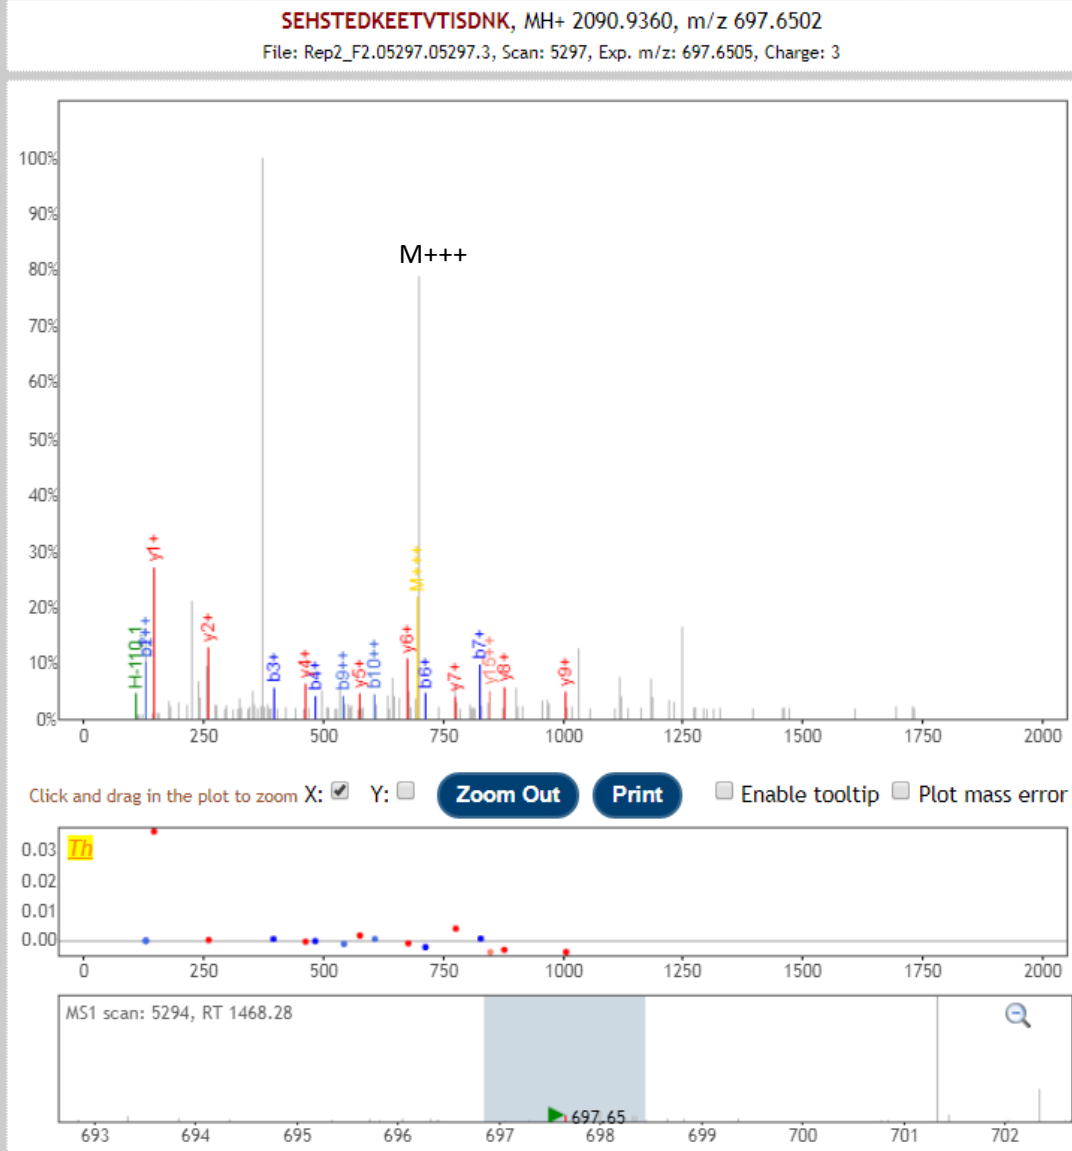

| b+        | b2+      | #  | Seq | #  | y+        | y2+      |
|-----------|----------|----|-----|----|-----------|----------|
| 130.0499  | 65.5286  | 1  | S   | 18 |           |          |
| 259.0925  | 130.0499 | 2  | E   | 17 | 1961.8934 | 981.4504 |
| 396.1514  | 198.5793 | 3  | H   | 16 | 1832.8508 | 916.9291 |
| 483.1834  | 242.0953 | 4  | S   | 15 | 1695.7919 | 848.3996 |
| 584.2311  | 292.6192 | 5  | T   | 14 | 1608.7599 | 804.8836 |
| 713.2737  | 357.1405 | 6  | E   | 13 | 1507.7122 | 754.3597 |
| 828.3006  | 414.6539 | 7  | D   | 12 | 1378.6696 | 689.8385 |
| 956.3956  | 478.7014 | 8  | K   | 11 | 1263.6427 | 632.3250 |
| 1085.4382 | 543.2227 | 9  | E   | 10 | 1135.5477 | 568.2775 |
| 1214.4808 | 607.7440 | 10 | E   | 9  | 1006.5051 | 503.7562 |
| 1315.5284 | 658.2679 | 11 | T   | 8  | 877.4625  | 439.2349 |
| 1414.5969 | 707.8021 | 12 | V   | 7  | 776.4149  | 388.7111 |
| 1515.6445 | 758.3259 | 13 | T   | 6  | 677.3464  | 339.1769 |
| 1628.7286 | 814.8679 | 14 | I   | 5  | 576.2988  | 288.6530 |
| 1715.7606 | 858.3840 | 15 | S   | 4  | 463.2147  | 232.1110 |
| 1830.7876 | 915.8974 | 16 | D   | 3  | 376.1827  | 188.5950 |
| 1944.8305 | 972.9189 | 17 | N   | 2  | 261.1557  | 131.0815 |
|           |          | 18 | K   | 1  | 147.1128  | 74.0600  |

[\[Click\]](#) to move table

Add to N-term: **42.010565**

| Gene           | Description   | Peptide with cleaved & acetylated PEXEL |
|----------------|---------------|-----------------------------------------|
| PBANKA_1465000 | fam-c protein | RSL.SEHSTEDKEETVTISDNK                  |

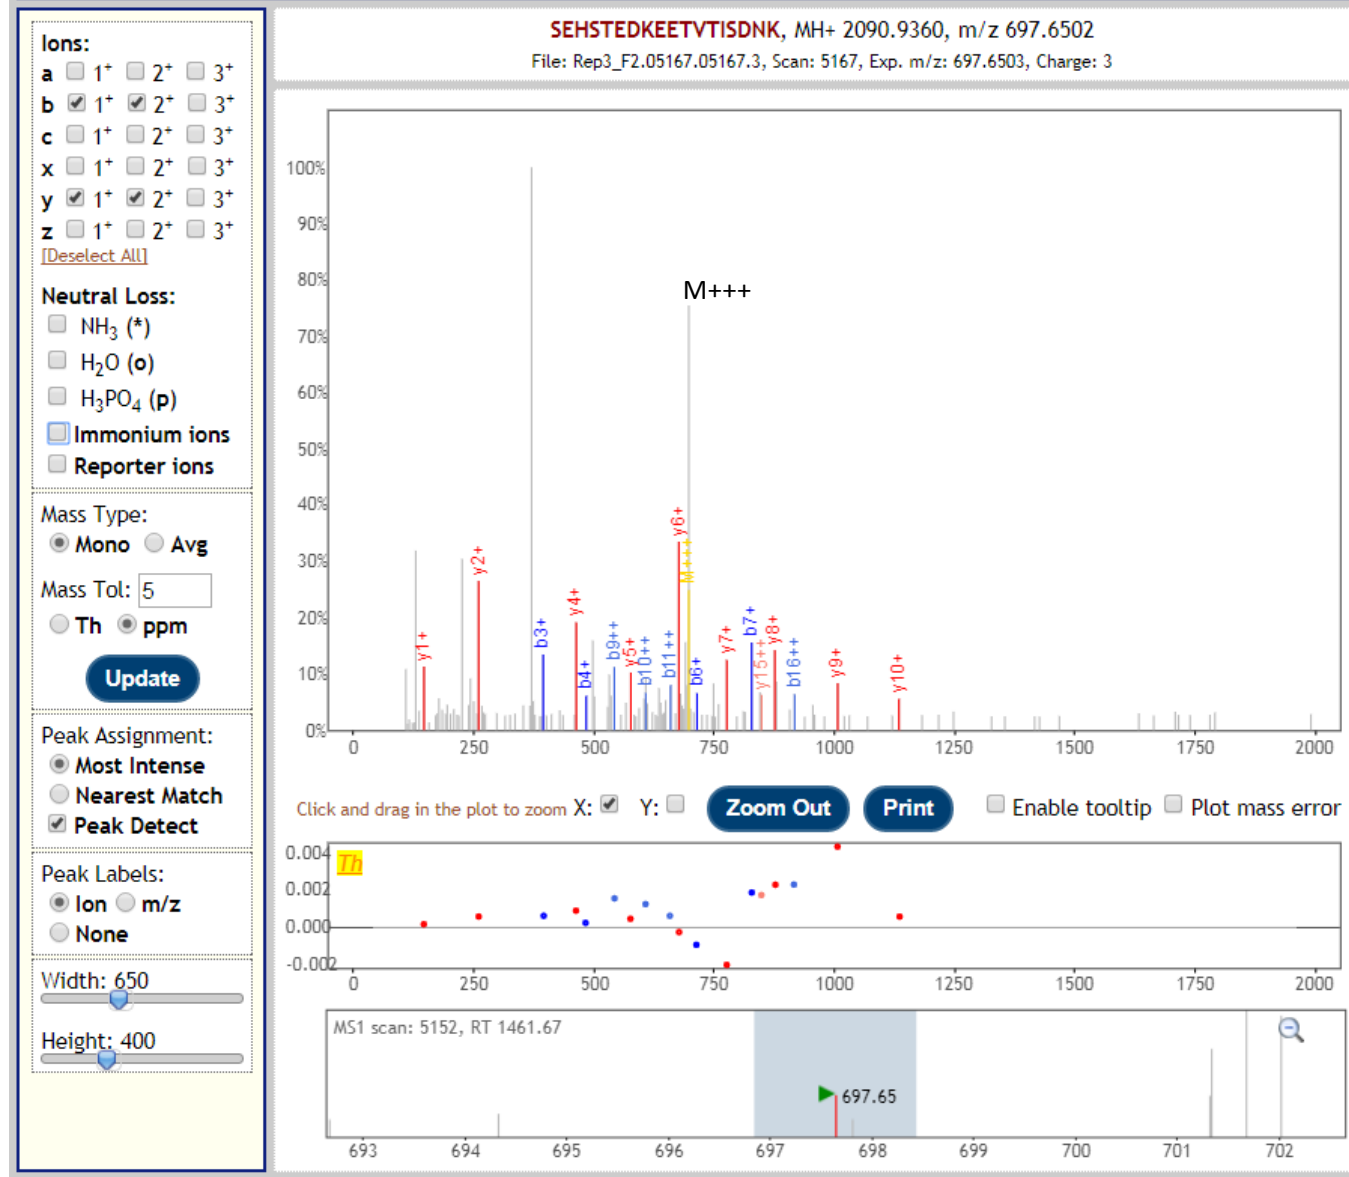

**Ions:**

a  1+  2+  3+

b  1+  2+  3+

c  1+  2+  3+

x  1+  2+  3+

y  1+  2+  3+

z  1+  2+  3+

[\[Deselect All\]](#)

**Neutral Loss:**

NH<sub>3</sub> (\*)

H<sub>2</sub>O (o)

H<sub>3</sub>PO<sub>4</sub> (p)

Immonium ions

Reporter ions

**Mass Type:**

Mono  Avg

Mass Tol:

Th  ppm

**Update**

**Peak Assignment:**

Most Intense

Nearest Match

Peak Detect

**Peak Labels:**

Ion  m/z

None

Width:

Height:

| b+        | b2+      | #  | Seq | #  | y+        | y2+      |
|-----------|----------|----|-----|----|-----------|----------|
| 130.0499  | 65.5286  | 1  | S   | 18 |           |          |
| 259.0925  | 130.0499 | 2  | E   | 17 | 1961.8934 | 981.4504 |
| 396.1514  | 198.5793 | 3  | H   | 16 | 1832.8508 | 916.9291 |
| 483.1834  | 242.0953 | 4  | S   | 15 | 1695.7919 | 848.3996 |
| 584.2311  | 292.6192 | 5  | T   | 14 | 1608.7599 | 804.8836 |
| 713.2737  | 357.1405 | 6  | E   | 13 | 1507.7122 | 754.3597 |
| 828.3006  | 414.6539 | 7  | D   | 12 | 1378.6696 | 689.8385 |
| 956.3956  | 478.7014 | 8  | K   | 11 | 1263.6427 | 632.3250 |
| 1085.4382 | 543.2227 | 9  | E   | 10 | 1135.5477 | 568.2775 |
| 1214.4808 | 607.7440 | 10 | E   | 9  | 1006.5051 | 503.7562 |
| 1315.5284 | 658.2679 | 11 | T   | 8  | 877.4625  | 439.2349 |
| 1414.5969 | 707.8021 | 12 | V   | 7  | 776.4149  | 388.7111 |
| 1515.6445 | 758.3259 | 13 | T   | 6  | 677.3464  | 339.1769 |
| 1628.7286 | 814.8679 | 14 | I   | 5  | 576.2988  | 288.6530 |
| 1715.7606 | 858.3840 | 15 | S   | 4  | 463.2147  | 232.1110 |
| 1830.7876 | 915.8974 | 16 | D   | 3  | 376.1827  | 188.5950 |
| 1944.8305 | 972.9189 | 17 | N   | 2  | 261.1557  | 131.0815 |
|           |          | 18 | K   | 1  | 147.1128  | 74.0600  |

[\[Click\]](#) to move table

Add to N-term: **42.010565**

| Gene           | Description   | Peptide with cleaved & acetylated PEXEL |
|----------------|---------------|-----------------------------------------|
| PBANKA_1465000 | fam-c protein | RSL.SEHSTEDKEETVTISDNKSSK               |

**Ions:**

a  1<sup>+</sup>  2<sup>+</sup>  3<sup>+</sup>

b  1<sup>+</sup>  2<sup>+</sup>  3<sup>+</sup>

c  1<sup>+</sup>  2<sup>+</sup>  3<sup>+</sup>

x  1<sup>+</sup>  2<sup>+</sup>  3<sup>+</sup>

y  1<sup>+</sup>  2<sup>+</sup>  3<sup>+</sup>

z  1<sup>+</sup>  2<sup>+</sup>  3<sup>+</sup>

[\[Deselect All\]](#)

**Neutral Loss:**

NH<sub>3</sub> (\*)

H<sub>2</sub>O (o)

H<sub>3</sub>PO<sub>4</sub> (p)

Immonium ions

Reporter ions

**Mass Type:**

Mono  Avg

Mass Tol:

Th  ppm

[Update](#)

**Peak Assignment:**

Most Intense

Nearest Match

Peak Detect

**Peak Labels:**

Ion  m/z

None

Width:

Height:

**SEHSTEDKEETVTISDNKSSK, MH+ 2393.0950, m/z 599.0292**

File: Rep2\_F3.04590.04590.4, Scan: 4590, Exp. m/z: 599.0283, Charge: 4

Click and drag in the plot to zoom X:  Y:  [Zoom Out](#) [Print](#)  Enable tooltip  Plot mass error

MS1 scan: 4576, RT 1240.04

| b+        | b2+       | b3+      | #  | Seq | #  | y+        | y2+       | y3+      |
|-----------|-----------|----------|----|-----|----|-----------|-----------|----------|
| 130.0499  | 65.5286   | 44.0215  | 1  | S   | 21 |           |           |          |
| 259.0925  | 130.0499  | 87.0357  | 2  | E   | 20 | 2264.0525 | 1132.5299 | 755.3557 |
| 396.1514  | 198.5793  | 132.7220 | 3  | H   | 19 | 2135.0099 | 1068.0086 | 712.3415 |
| 483.1834  | 242.0953  | 161.7327 | 4  | S   | 18 | 1997.9510 | 999.4791  | 666.6552 |
| 584.2311  | 292.6192  | 195.4152 | 5  | T   | 17 | 1910.9189 | 955.9631  | 637.6445 |
| 713.2737  | 357.1405  | 238.4294 | 6  | E   | 16 | 1809.8712 | 905.4393  | 603.9619 |
| 828.3006  | 414.6539  | 276.7717 | 7  | D   | 15 | 1680.8286 | 840.9180  | 560.9477 |
| 956.3956  | 478.7014  | 319.4700 | 8  | K   | 14 | 1565.8017 | 783.4045  | 522.6054 |
| 1085.4382 | 543.2227  | 362.4842 | 9  | E   | 13 | 1437.7067 | 719.3570  | 479.9071 |
| 1214.4808 | 607.7440  | 405.4984 | 10 | E   | 12 | 1308.6642 | 654.8357  | 436.8929 |
| 1315.5284 | 658.2679  | 439.1810 | 11 | T   | 11 | 1179.6216 | 590.3144  | 393.8787 |
| 1414.5969 | 707.8021  | 472.2038 | 12 | V   | 10 | 1078.5739 | 539.7906  | 360.1961 |
| 1515.6445 | 758.3259  | 505.8864 | 13 | T   | 9  | 979.5055  | 490.2564  | 327.1733 |
| 1628.7286 | 814.8679  | 543.5811 | 14 | I   | 8  | 878.4578  | 439.7325  | 293.4908 |
| 1715.7606 | 858.3840  | 572.5917 | 15 | S   | 7  | 765.3737  | 383.1905  | 255.7961 |
| 1830.7876 | 915.8974  | 610.9340 | 16 | D   | 6  | 678.3417  | 339.6745  | 226.7854 |
| 1944.8305 | 972.9189  | 648.9484 | 17 | N   | 5  | 563.3148  | 282.1610  | 188.4431 |
| 2072.9255 | 1036.9664 | 691.6467 | 18 | K   | 4  | 449.2718  | 225.1395  | 150.4288 |
| 2159.9575 | 1080.4824 | 720.6573 | 19 | S   | 3  | 321.1769  | 161.0921  | 107.7305 |
| 2246.9895 | 1123.9984 | 749.6680 | 20 | S   | 2  | 234.1448  | 117.5761  | 78.7198  |
|           |           |          | 21 | K   | 1  | 147.1128  | 74.0600   | 49.7091  |

[\[Click\]](#) to move table

Add to N-term: **42.010565**

| Gene           | Description                                   | Peptide with cleaved & acetylated PEXEL |
|----------------|-----------------------------------------------|-----------------------------------------|
| PBANKA_0700700 | Plasmodium exported protein, unknown function | RIL.SSMSNEKYPYNILR                      |

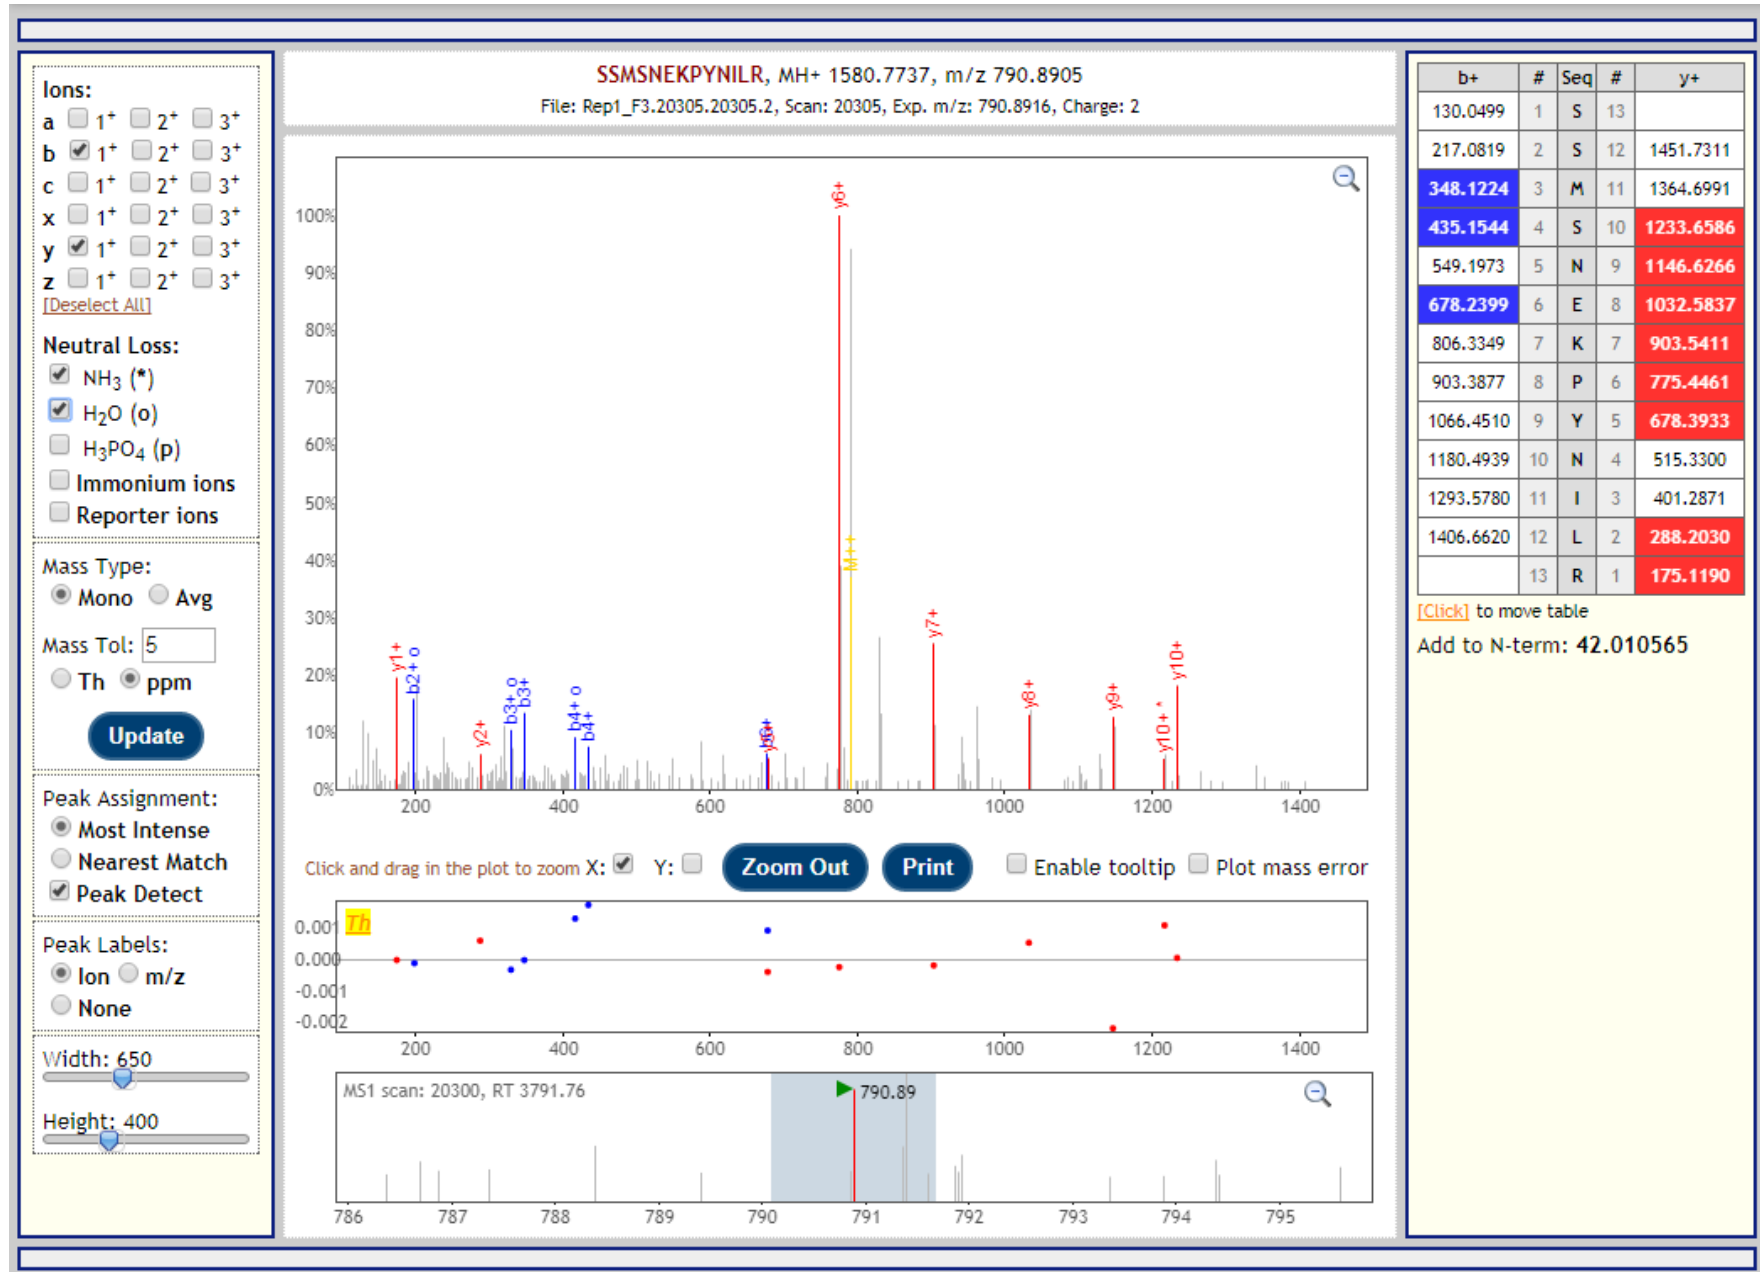

| Gene           | Description                                   | Peptide with cleaved & acetylated PEXEL |
|----------------|-----------------------------------------------|-----------------------------------------|
| PBANKA_0700700 | Plasmodium exported protein, unknown function | RIL.SSMSNEKPYNILR                       |

**Ions:**

a  1<sup>+</sup>  2<sup>+</sup>  3<sup>+</sup>

b  1<sup>+</sup>  2<sup>+</sup>  3<sup>+</sup>

c  1<sup>+</sup>  2<sup>+</sup>  3<sup>+</sup>

x  1<sup>+</sup>  2<sup>+</sup>  3<sup>+</sup>

y  1<sup>+</sup>  2<sup>+</sup>  3<sup>+</sup>

z  1<sup>+</sup>  2<sup>+</sup>  3<sup>+</sup>

[\[Deselect All\]](#)

**Neutral Loss:**

NH<sub>3</sub> (\*)

H<sub>2</sub>O (o)

H<sub>3</sub>PO<sub>4</sub> (p)

Immonium ions

Reporter ions

**Mass Type:**

Mono  Avg

Mass Tol:

Th  ppm

**Update**

**Peak Assignment:**

Most Intense

Nearest Match

Peak Detect

**Peak Labels:**

Ion  m/z

None

Width:

Height:

**SSMSNEKPYNILR, MH+ 1580.7737, m/z 790.8905**

File: Rep3\_F3.22417.22417.2, Scan: 22417, Exp. m/z: 790.8908, Charge: 2

Click and drag in the plot to zoom X:  Y:  **Zoom Out** **Print**  Enable tooltip  Plot mass error

MS1 scan: 22402, RT 3235.50

| b+        | b2+      | #  | Seq | #  | y+        | y2+      |
|-----------|----------|----|-----|----|-----------|----------|
| 130.0499  | 65.5286  | 1  | S   | 13 |           |          |
| 217.0819  | 109.0446 | 2  | S   | 12 | 1451.7311 | 726.3692 |
| 348.1224  | 174.5648 | 3  | M   | 11 | 1364.6991 | 682.8532 |
| 435.1544  | 218.0808 | 4  | S   | 10 | 1233.6586 | 617.3329 |
| 549.1973  | 275.1023 | 5  | N   | 9  | 1146.6266 | 573.8169 |
| 678.2399  | 339.6236 | 6  | E   | 8  | 1032.5837 | 516.7955 |
| 806.3349  | 403.6711 | 7  | K   | 7  | 903.5411  | 452.2742 |
| 903.3877  | 452.1975 | 8  | P   | 6  | 775.4461  | 388.2267 |
| 1066.4510 | 533.7291 | 9  | Y   | 5  | 678.3933  | 339.7003 |
| 1180.4939 | 590.7506 | 10 | N   | 4  | 515.3300  | 258.1686 |
| 1293.5780 | 647.2926 | 11 | I   | 3  | 401.2871  | 201.1472 |
| 1406.6620 | 703.8347 | 12 | L   | 2  | 288.2030  | 144.6051 |
|           |          | 13 | R   | 1  | 175.1190  | 88.0631  |

[\[Click\]](#) to move table

Add to N-term: 42.010565

| Gene           | Description                                        | Peptide with cleaved & acetylated PEXEL |
|----------------|----------------------------------------------------|-----------------------------------------|
| PBANKA_0100600 | schizont membrane associated cytoadherence protein | RFL.VEYYDANIDQYNGNQSK                   |

**Ions:**

a  1+  2+  3+

b  1+  2+  3+

c  1+  2+  3+

x  1+  2+  3+

y  1+  2+  3+

z  1+  2+  3+

[\[Deselect All\]](#)

**Neutral Loss:**

NH<sub>3</sub> (\*)

H<sub>2</sub>O (o)

H<sub>3</sub>PO<sub>4</sub> (p)

Immonium ions

Reporter ions

**Mass Type:**

Mono  Avg

Mass Tol:

Th  ppm

**Update**

**Peak Assignment:**

Most Intense

Nearest Match

Peak Detect

**Peak Labels:**

Ion  m/z

None

Width:

Height:

**VEYYDANIDQYNGNQSK, MH+ 2062.8989, m/z 1031.9531**

File: Rep1\_F1.41273.41273.2, Scan: 41273, Exp. m/z: 1031.9539, Charge: 2

Click and drag in the plot to zoom X:  Y:  **Zoom Out** **Print**  Enable tooltip  Plot mass error

MS1 scan: 41264, RT 7179.04

| b+        | #  | Seq | #  | y+        |
|-----------|----|-----|----|-----------|
| 142.0863  | 1  | V   | 17 |           |
| 271.1288  | 2  | E   | 16 | 1921.8199 |
| 434.1922  | 3  | Y   | 15 | 1792.7773 |
| 597.2555  | 4  | Y   | 14 | 1629.7140 |
| 712.2824  | 5  | D   | 13 | 1466.6506 |
| 783.3196  | 6  | A   | 12 | 1351.6237 |
| 897.3625  | 7  | N   | 11 | 1280.5866 |
| 1010.4466 | 8  | I   | 10 | 1166.5436 |
| 1125.4735 | 9  | D   | 9  | 1053.4596 |
| 1253.5321 | 10 | Q   | 8  | 938.4326  |
| 1416.5954 | 11 | Y   | 7  | 810.3741  |
| 1530.6383 | 12 | N   | 6  | 647.3107  |
| 1587.6598 | 13 | G   | 5  | 533.2678  |
| 1701.7027 | 14 | N   | 4  | 476.2463  |
| 1829.7613 | 15 | Q   | 3  | 362.2034  |
| 1916.7933 | 16 | S   | 2  | 234.1448  |
|           | 17 | K   | 1  | 147.1128  |

[\[Click\]](#) to move table

Add to N-term: 42.010565

| Gene           | Description                                        | Peptide with cleaved & acetylated PEXEL |
|----------------|----------------------------------------------------|-----------------------------------------|
| PBANKA_0100600 | schizont membrane associated cytoadherence protein | RFL.VEYYDANIDQYNGNQSK                   |

**Ions:**

a  1<sup>+</sup>  2<sup>+</sup>  3<sup>+</sup>

b  1<sup>+</sup>  2<sup>+</sup>  3<sup>+</sup>

c  1<sup>+</sup>  2<sup>+</sup>  3<sup>+</sup>

x  1<sup>+</sup>  2<sup>+</sup>  3<sup>+</sup>

y  1<sup>+</sup>  2<sup>+</sup>  3<sup>+</sup>

z  1<sup>+</sup>  2<sup>+</sup>  3<sup>+</sup>

[\[Deselect All\]](#)

**Neutral Loss:**

NH<sub>3</sub> (\*)

H<sub>2</sub>O (o)

H<sub>3</sub>PO<sub>4</sub> (p)

Immonium ions

Reporter ions

**Mass Type:**

Mono  Avg

Mass Tol:

Th  ppm

[Update](#)

**Peak Assignment:**

Most Intense

Nearest Match

Peak Detect

**Peak Labels:**

Ion  m/z

None

Width:

Height:

**VEYYDANIDQYNGNQSK, MH+ 2062.8989, m/z 1031.9531**

File: Rep2\_F1.29400.29400.2, Scan: 29400, Exp. m/z: 1031.9541, Charge: 2

Click and drag in the plot to zoom X:  Y:  [Zoom Out](#) [Print](#)  Enable tooltip  Plot mass error

MS1 scan: 29396, RT 5817.10

| b+        | b2+      | #  | Seq | #  | y+        |
|-----------|----------|----|-----|----|-----------|
| 142.0863  | 71.5468  | 1  | V   | 17 |           |
| 271.1288  | 136.0681 | 2  | E   | 16 | 1921.8199 |
| 434.1922  | 217.5997 | 3  | Y   | 15 | 1792.7773 |
| 597.2555  | 299.1314 | 4  | Y   | 14 | 1629.7140 |
| 712.2824  | 356.6449 | 5  | D   | 13 | 1466.6506 |
| 783.3196  | 392.1634 | 6  | A   | 12 | 1351.6237 |
| 897.3625  | 449.1849 | 7  | N   | 11 | 1280.5866 |
| 1010.4466 | 505.7269 | 8  | I   | 10 | 1166.5436 |
| 1125.4735 | 563.2404 | 9  | D   | 9  | 1053.4596 |
| 1253.5321 | 627.2697 | 10 | Q   | 8  | 938.4326  |
| 1416.5954 | 708.8013 | 11 | Y   | 7  | 810.3741  |
| 1530.6383 | 765.8228 | 12 | N   | 6  | 647.3107  |
| 1587.6598 | 794.3335 | 13 | G   | 5  | 533.2678  |
| 1701.7027 | 851.3550 | 14 | N   | 4  | 476.2463  |
| 1829.7613 | 915.3843 | 15 | Q   | 3  | 362.2034  |
| 1916.7933 | 958.9003 | 16 | S   | 2  | 234.1448  |
|           |          | 17 | K   | 1  | 147.1128  |

[\[Click\]](#) to move table

Add to N-term: 42.010565

| Gene           | Description                                           | Peptide with cleaved & acetylated PEXEL |
|----------------|-------------------------------------------------------|-----------------------------------------|
| PBANKA_1145400 | Plasmodium exported protein (PHIST), unknown function | RNL.SETSVVNDNLSNNVNNLRDEPK              |

**Ions:**

a  1<sup>+</sup>  2<sup>+</sup>  3<sup>+</sup>

b  1<sup>+</sup>  2<sup>+</sup>  3<sup>+</sup>

c  1<sup>+</sup>  2<sup>+</sup>  3<sup>+</sup>

x  1<sup>+</sup>  2<sup>+</sup>  3<sup>+</sup>

y  1<sup>+</sup>  2<sup>+</sup>  3<sup>+</sup>

z  1<sup>+</sup>  2<sup>+</sup>  3<sup>+</sup>

[\[Deselect All\]](#)

**Neutral Loss:**

NH<sub>3</sub> (\*)

H<sub>2</sub>O (o)

H<sub>3</sub>PO<sub>4</sub> (p)

Immonium ions

Reporter ions

**Mass Type:**

Mono  Avg

Mass Tol:

Th  ppm

**Update**

**Peak Assignment:**

Most Intense

Nearest Match

Peak Detect

**Peak Labels:**

Ion  m/z

None

Width:

Height:

**SETSVVNDNLSNNVNNLRDEPK, MH+ 2500.1910, m/z 1250.5991**

File: Rep1\_F2.32796.32796.2, Scan: 32796, Exp. m/z: 1250.599, Charge: 2

Click and drag in the plot to zoom X:  Y:  **Zoom Out** **Print**  Enable tooltip  Plot mass error

| b+              | #  | Seq | #  | y+               |
|-----------------|----|-----|----|------------------|
| 130.0499        | 1  | S   | 22 |                  |
| 259.0925        | 2  | E   | 21 | 2371.1484        |
| <b>360.1401</b> | 3  | T   | 20 | 2242.1058        |
| <b>447.1722</b> | 4  | S   | 19 | 2141.0581        |
| <b>546.2406</b> | 5  | V   | 18 | 2054.0261        |
| 645.3090        | 6  | V   | 17 | 1954.9577        |
| 759.3519        | 7  | N   | 16 | 1855.8893        |
| 874.3789        | 8  | D   | 15 | <b>1741.8464</b> |
| 988.4218        | 9  | N   | 14 | 1626.8194        |
| 1101.5059       | 10 | L   | 13 | <b>1512.7765</b> |
| 1188.5379       | 11 | S   | 12 | <b>1399.6924</b> |
| 1302.5808       | 12 | N   | 11 | <b>1312.6604</b> |
| 1416.6237       | 13 | N   | 10 | 1198.6175        |
| 1515.6922       | 14 | V   | 9  | <b>1084.5745</b> |
| 1629.7351       | 15 | N   | 8  | <b>985.5061</b>  |
| 1743.7780       | 16 | N   | 7  | 871.4632         |
| 1856.8621       | 17 | L   | 6  | 757.4203         |
| 2012.9632       | 18 | R   | 5  | <b>644.3362</b>  |
| 2127.9901       | 19 | D   | 4  | 488.2351         |
| 2257.0327       | 20 | E   | 3  | 373.2082         |
| 2354.0855       | 21 | P   | 2  | <b>244.1656</b>  |
|                 | 22 | K   | 1  | <b>147.1128</b>  |

[\[Click\]](#) to move table

Add to N-term: 42.010565



| Gene           | Description                          | Peptide with cleaved & acetylated PEXEL |
|----------------|--------------------------------------|-----------------------------------------|
| PBANKA_1106800 | subtilisin-like protease 3, putative | RIL.NQINNKELEINKNMK                     |

**Ions:**

a  1<sup>+</sup>  2<sup>+</sup>  3<sup>+</sup>

b  1<sup>+</sup>  2<sup>+</sup>  3<sup>+</sup>

c  1<sup>+</sup>  2<sup>+</sup>  3<sup>+</sup>

x  1<sup>+</sup>  2<sup>+</sup>  3<sup>+</sup>

y  1<sup>+</sup>  2<sup>+</sup>  3<sup>+</sup>

z  1<sup>+</sup>  2<sup>+</sup>  3<sup>+</sup>

[Deselect All](#)

**Neutral Loss:**

NH<sub>3</sub> (\*)

H<sub>2</sub>O (o)

H<sub>3</sub>PO<sub>4</sub> (p)

Immonium ions

Reporter ions

**Mass Type:**

Mono  Avg

Mass Tol:

Th  ppm

**Update**

**Peak Assignment:**

Most Intense

Nearest Match

Peak Detect

**Peak Labels:**

Ion  m/z

None

Width:

Height:

**NQINNKELEINKNMK, MH<sup>+</sup> 1871.9644, m/z 624.6596**

File: Rep2\_F4.11337.11337.3, Scan: 11337, Exp. m/z: 624.6603, Charge: 3

Click and drag in the plot to zoom X:  Y:  **Zoom Out** **Print**  Enable tooltip  Plot mass error

MS1 scan: 11320, RT 1983.06

| b+        | #  | Seq | #  | y+        | y2+      |
|-----------|----|-----|----|-----------|----------|
| 157.0608  | 1  | N   | 15 |           |          |
| 285.1193  | 2  | Q   | 14 | 1715.9109 | 858.4591 |
| 398.2034  | 3  | I   | 13 | 1587.8523 | 794.4298 |
| 512.2463  | 4  | N   | 12 | 1474.7682 | 737.8878 |
| 626.2893  | 5  | N   | 11 | 1360.7253 | 680.8663 |
| 754.3842  | 6  | K   | 10 | 1246.6824 | 623.8448 |
| 883.4268  | 7  | E   | 9  | 1118.5874 | 559.7973 |
| 996.5109  | 8  | L   | 8  | 989.5448  | 495.2761 |
| 1125.5535 | 9  | E   | 7  | 876.4608  | 438.7340 |
| 1238.6375 | 10 | I   | 6  | 747.4182  | 374.2127 |
| 1352.6805 | 11 | N   | 5  | 634.3341  | 317.6707 |
| 1480.7754 | 12 | K   | 4  | 520.2912  | 260.6492 |
| 1594.8184 | 13 | N   | 3  | 392.1962  | 196.6017 |
| 1725.8588 | 14 | M   | 2  | 278.1533  | 139.5803 |
|           | 15 | K   | 1  | 147.1128  | 74.0600  |

[\[Click\]](#) to move table

Add to N-term: 42.010565

| Gene           | Protein | Description                          | Peptide with cleaved & acetylated PEXEL |
|----------------|---------|--------------------------------------|-----------------------------------------|
| PBANKA_1106800 | SUB3    | subtilisin-like protease 3, putative | RIL.NQINNKELEINK                        |

**Ions:**

a  1<sup>+</sup>  2<sup>+</sup>  3<sup>+</sup>

b  1<sup>+</sup>  2<sup>+</sup>  3<sup>+</sup>

c  1<sup>+</sup>  2<sup>+</sup>  3<sup>+</sup>

x  1<sup>+</sup>  2<sup>+</sup>  3<sup>+</sup>

y  1<sup>+</sup>  2<sup>+</sup>  3<sup>+</sup>

z  1<sup>+</sup>  2<sup>+</sup>  3<sup>+</sup>

[\[Deselect All\]](#)

**Neutral Loss:**

NH<sub>3</sub> (\*)

H<sub>2</sub>O (o)

H<sub>3</sub>PO<sub>4</sub> (p)

Immonium ions

Reporter ions

**Mass Type:**

Mono  Avg

Mass Tol:

Th  ppm

**Update**

**Peak Assignment:**

Most Intense

Nearest Match

Peak Detect

**Peak Labels:**

Ion  m/z

None

Width:

Height:

**NQINNKELEINK**, MH<sup>+</sup> 1498.7860, m/z 749.8966

File: Rep3\_F2.10330.10330.2, Scan: 10330, Exp. m/z: 749.8977, Charge: 2

Click and drag in the plot to zoom X:  Y:  **Zoom Out** **Print**  Enable tooltip  Plot mass error

MS1 scan: 10320, RT 2228.04

| b+        | b2+      | #  | Seq # | y+        | y2+      |
|-----------|----------|----|-------|-----------|----------|
| 157.0608  | 79.0340  | 1  | N 12  |           |          |
| 285.1193  | 143.0633 | 2  | Q 11  | 1342.7325 | 671.8699 |
| 398.2034  | 199.6053 | 3  | I 10  | 1214.6739 | 607.8406 |
| 512.2463  | 256.6268 | 4  | N 9   | 1101.5899 | 551.2986 |
| 626.2893  | 313.6483 | 5  | N 8   | 987.5469  | 494.2771 |
| 754.3842  | 377.6958 | 6  | K 7   | 873.5040  | 437.2556 |
| 883.4268  | 442.2170 | 7  | E 6   | 745.4090  | 373.2082 |
| 996.5109  | 498.7591 | 8  | L 5   | 616.3665  | 308.6869 |
| 1125.5535 | 563.2804 | 9  | E 4   | 503.2824  | 252.1448 |
| 1238.6375 | 619.8224 | 10 | I 3   | 374.2398  | 187.6235 |
| 1352.6805 | 676.8439 | 11 | N 2   | 261.1557  | 131.0815 |
|           |          | 12 | K 1   | 147.1128  | 74.0600  |

[\[Click\]](#) to move table

Add to N-term: 42.010565

| Gene                                                                    | Description   | Peptide with cleaved & acetylated PEXEL   |
|-------------------------------------------------------------------------|---------------|-------------------------------------------|
| PBANKA_1200041,<br>PBANKA_1246961,<br>PBANKA_1300041,<br>PBANKA_0007801 | fam-b protein | RIL.AYADNEFDLNGFYQSTLNLASQLGDCVEGNKEIAHLR |

**Ions:**

a  1+  2+  3+

b  1+  2+  3+

c  1+  2+  3+

x  1+  2+  3+

y  1+  2+  3+

z  1+  2+  3+

[\[Deselect All\]](#)

**Neutral Loss:**

NH<sub>3</sub> (\*)

H<sub>2</sub>O (o)

H<sub>3</sub>PO<sub>4</sub> (p)

Immonium ions

Reporter ions

**Mass Type:**

Mono  Avg

Mass Tol:

Th  ppm

**Update**

**Peak Assignment:**

Most Intense

Nearest Match

Peak Detect

**Peak Labels:**

Ion  m/z  None

Width:

Height:

**AYADNEFDLNGFYQSTLNLASQLGDCVEGNKEIAHLR, MH+ 4214.9724, m/z 1405.6623**

File: Rep2\_F6\_95379.95379.3, Scan: 95379, Exp. m/z: 1405.6663, Charge: 3

Click and drag in the plot to zoom X:  Y:  **Zoom Out** **Print**  Enable tooltip  Plot mass error

MS1 scan: 95372, RT 9762.05

| b+              | #  | Seq      | #  | y+              | y2+             |
|-----------------|----|----------|----|-----------------|-----------------|
| 114.0550        | 1  | A        | 37 |                 |                 |
| <b>277.1183</b> | 2  | Y        | 36 | 4101.9247       | 2051.4660       |
| <b>348.1554</b> | 3  | A        | 35 | 3938.8614       | 1969.9343       |
| 463.1823        | 4  | D        | 34 | 3867.8243       | 1934.4158       |
| 577.2253        | 5  | N        | 33 | 3752.7973       | 1876.9023       |
| <b>706.2679</b> | 6  | E        | 32 | 3638.7544       | 1819.8808       |
| 853.3363        | 7  | F        | 31 | 3509.7118       | 1755.3595       |
| 968.3632        | 8  | D        | 30 | 3362.6434       | 1681.8253       |
| 1081.4473       | 9  | L        | 29 | 3247.6164       | 1624.3119       |
| 1195.4902       | 10 | N        | 28 | 3134.5324       | 1567.7698       |
| 1252.5117       | 11 | G        | 27 | 3020.4894       | 1510.7484       |
| 1399.5801       | 12 | F        | 26 | 2963.4680       | 1482.2376       |
| 1562.6434       | 13 | Y        | 25 | 2816.3996       | 1408.7034       |
| 1690.7020       | 14 | Q        | 24 | 2653.3362       | 1327.1718       |
| 1777.7340       | 15 | S        | 23 | 2525.2777       | 1263.1425       |
| 1878.7817       | 16 | T        | 22 | 2438.2456       | 1219.6265       |
| 1991.8658       | 17 | L        | 21 | 2337.1980       | 1169.1026       |
| 2105.9087       | 18 | N        | 20 | 2224.1139       | 1112.5606       |
| 2218.9928       | 19 | L        | 19 | 2110.0710       | 1055.5391       |
| 2290.0299       | 20 | A        | 18 | 1996.9869       | 998.9971        |
| 2377.0619       | 21 | S        | 17 | 1925.9498       | <b>963.4785</b> |
| 2505.1205       | 22 | Q        | 16 | 1838.9178       | <b>919.9625</b> |
| 2618.2045       | 23 | L        | 15 | 1710.8592       | <b>855.9332</b> |
| 2675.2260       | 24 | G        | 14 | 1597.7751       | <b>799.3912</b> |
| 2790.2529       | 25 | D        | 13 | 1540.7537       | 770.8805        |
| 2950.2836       | 26 | <b>C</b> | 12 | 1425.7267       | 713.3670        |
| 3049.3520       | 27 | V        | 11 | 1265.6961       | 633.3517        |
| 3178.3946       | 28 | E        | 10 | 1166.6276       | 583.8175        |
| 3235.4161       | 29 | G        | 9  | 1037.5851       | 519.2962        |
| 3349.4590       | 30 | N        | 8  | 980.5636        | 490.7854        |
| 3477.5540       | 31 | K        | 7  | 866.5207        | 433.7640        |
| 3606.5965       | 32 | E        | 6  | 738.4257        | 369.7165        |
| 3719.6806       | 33 | I        | 5  | 609.3831        | 305.1952        |
| 3790.7177       | 34 | A        | 4  | 496.2990        | 248.6532        |
| 3927.7766       | 35 | H        | 3  | 425.2619        | 213.1346        |
| 4040.8607       | 36 | L        | 2  | 288.2030        | 144.6051        |
|                 | 37 | <b>R</b> | 1  | <b>175.1190</b> | 88.0631         |

[\[Click\]](#) to move table

Add to N-term: 42.010565

Variable Modifications:  
C: 57.021464 [26]

| Gene                                                 | Description   | Peptide with cleaved & acetylated PEXEL   |
|------------------------------------------------------|---------------|-------------------------------------------|
| PBANKA_0500741,<br>PBANKA_1000071,<br>PBANKA_1146781 | fam-b protein | RIL.SYADNEFDLNGFYQSTLNLANQLGDCVEGKKEIEHLR |

**Ions:**

a  1<sup>+</sup>  2<sup>+</sup>  3<sup>+</sup>

b  1<sup>+</sup>  2<sup>+</sup>  3<sup>+</sup>

c  1<sup>+</sup>  2<sup>+</sup>  3<sup>+</sup>

x  1<sup>+</sup>  2<sup>+</sup>  3<sup>+</sup>

y  1<sup>+</sup>  2<sup>+</sup>  3<sup>+</sup>

z  1<sup>+</sup>  2<sup>+</sup>  3<sup>+</sup>

[\[Deselect All\]](#)

**Neutral Loss:**

NH<sub>3</sub> (\*)

H<sub>2</sub>O (o)

H<sub>3</sub>PO<sub>4</sub> (p)

Immonium ions

Reporter ions

**Mass Type:**

Mono  Avg

Mass Tol:

Th  ppm

[Update](#)

**Peak Assignment:**

Most Intense

Nearest Match

Peak Detect

**Peak Labels:**

Ion  m/z

None

Width:

Height:

**SYADNEFDLNGFYQSTLNLANQLGDCVEGKKEIEHLR**, MH+ 4330.0357, m/z 1083.2644

File: Rep3\_F5.90657.90657.4, Scan: 90657, Exp. m/z: 1083.2655, Charge: 4

Click and drag in the plot to zoom X:  Y:  [Zoom Out](#) [Print](#)  Enable tooltip  Plot mass error

MS1 scan: 90644, RT 9191.07

| b+        | #  | Seq | #  | y+        | y2+       |
|-----------|----|-----|----|-----------|-----------|
| 130.0499  | 1  | S   | 37 |           |           |
| 293.1132  | 2  | Y   | 36 | 4200.9931 | 2101.0002 |
| 364.1503  | 3  | A   | 35 | 4037.9298 | 2019.4685 |
| 479.1773  | 4  | D   | 34 | 3966.8927 | 1983.9500 |
| 593.2202  | 5  | N   | 33 | 3851.8657 | 1926.4365 |
| 722.2628  | 6  | E   | 32 | 3737.8228 | 1869.4150 |
| 869.3312  | 7  | F   | 31 | 3608.7802 | 1804.8937 |
| 984.3581  | 8  | D   | 30 | 3461.7118 | 1731.3595 |
| 1097.4422 | 9  | L   | 29 | 3346.6849 | 1673.8461 |
| 1211.4851 | 10 | N   | 28 | 3233.6008 | 1617.3040 |
| 1268.5066 | 11 | G   | 27 | 3119.5579 | 1560.2826 |
| 1415.5750 | 12 | F   | 26 | 3062.5364 | 1531.7718 |
| 1578.6383 | 13 | Y   | 25 | 2915.4680 | 1458.2376 |
| 1706.6969 | 14 | Q   | 24 | 2752.4047 | 1376.7060 |
| 1793.7289 | 15 | S   | 23 | 2624.3461 | 1312.6767 |
| 1894.7766 | 16 | T   | 22 | 2537.3140 | 1269.1607 |
| 2007.8607 | 17 | L   | 21 | 2436.2664 | 1218.6368 |
| 2121.9036 | 18 | N   | 20 | 2323.1823 | 1162.0948 |
| 2234.9877 | 19 | L   | 19 | 2209.1394 | 1105.0733 |
| 2306.0248 | 20 | A   | 18 | 2096.0553 | 1048.5313 |
| 2420.0677 | 21 | N   | 17 | 2025.0182 | 1013.0127 |
| 2548.1263 | 22 | Q   | 16 | 1910.9753 | 955.9913  |
| 2661.2104 | 23 | L   | 15 | 1782.9167 | 891.9620  |
| 2718.2318 | 24 | G   | 14 | 1669.8326 | 835.4200  |
| 2833.2588 | 25 | D   | 13 | 1612.8112 | 806.9092  |
| 2993.2894 | 26 | C   | 12 | 1497.7842 | 749.3957  |
| 3092.3578 | 27 | V   | 11 | 1337.7536 | 669.3804  |
| 3221.4004 | 28 | E   | 10 | 1238.6852 | 619.8462  |
| 3278.4219 | 29 | G   | 9  | 1109.6426 | 555.3249  |
| 3406.5168 | 30 | K   | 8  | 1052.6211 | 526.8142  |
| 3534.6118 | 31 | K   | 7  | 924.5261  | 462.7667  |
| 3663.6544 | 32 | E   | 6  | 796.4312  | 398.7192  |
| 3776.7385 | 33 | I   | 5  | 667.3886  | 334.1979  |
| 3905.7811 | 34 | E   | 4  | 554.3045  | 277.6559  |
| 4042.8400 | 35 | H   | 3  | 425.2619  | 213.1346  |
| 4155.9240 | 36 | L   | 2  | 288.2030  | 144.6051  |
|           | 37 | R   | 1  | 175.1190  | 88.0631   |

[\[Click\]](#) to move table

Add to N-term: 42.010565

Variable Modifications:  
C: 57.021464 [26]

| Gene           | Protein | Description                                                              | Peptide with cleaved & acetylated PEXEL |
|----------------|---------|--------------------------------------------------------------------------|-----------------------------------------|
| PBANKA_1342800 | NMNAT   | nicotinamide/nicotinic acid mononucleotide adenylyltransferase, putative | KDL.ESENTTATYDLLNMLKK                   |

**Ions:**

a  1<sup>+</sup>  2<sup>+</sup>  3<sup>+</sup>

b  1<sup>+</sup>  2<sup>+</sup>  3<sup>+</sup>

c  1<sup>+</sup>  2<sup>+</sup>  3<sup>+</sup>

x  1<sup>+</sup>  2<sup>+</sup>  3<sup>+</sup>

y  1<sup>+</sup>  2<sup>+</sup>  3<sup>+</sup>

z  1<sup>+</sup>  2<sup>+</sup>  3<sup>+</sup>

[\[Deselect All\]](#)

**Neutral Loss:**

NH<sub>3</sub> (\*)

H<sub>2</sub>O (o)

H<sub>3</sub>PO<sub>4</sub> (p)

Immonium ions

Reporter ions

**Mass Type:**

Mono  Avg

Mass Tol:

Th  ppm

**Update**

**Peak Assignment:**

Most Intense

Nearest Match

Peak Detect

**Peak Labels:**

Ion  m/z

None

Width:

Height:

**ESENTTATYDLLNMLKK, MH+ 2012.9845, m/z 671.6664**

File: Rep2\_F6.62639.62639.3, Scan: 62639, Exp. m/z: 671.6682, Charge: 3

Click and drag in the plot to zoom X:  Y:  **Zoom Out** **Print**  Enable tooltip  Plot mass error

| b+        | #  | Seq | #  | y+        | y2+      |
|-----------|----|-----|----|-----------|----------|
| 172.0604  | 1  | E   | 17 |           |          |
| 259.0925  | 2  | S   | 16 | 1841.9313 | 921.4693 |
| 388.1351  | 3  | E   | 15 | 1754.8993 | 877.9533 |
| 502.1780  | 4  | N   | 14 | 1625.8567 | 813.4320 |
| 603.2257  | 5  | T   | 13 | 1511.8138 | 756.4105 |
| 704.2733  | 6  | T   | 12 | 1410.7661 | 705.8867 |
| 775.3105  | 7  | A   | 11 | 1309.7184 | 655.3629 |
| 876.3581  | 8  | T   | 10 | 1238.6813 | 619.8443 |
| 1039.4215 | 9  | Y   | 9  | 1137.6336 | 569.3205 |
| 1154.4484 | 10 | D   | 8  | 974.5703  | 487.7888 |
| 1267.5325 | 11 | L   | 7  | 859.5434  | 430.2753 |
| 1380.6165 | 12 | L   | 6  | 746.4593  | 373.7333 |
| 1494.6595 | 13 | N   | 5  | 633.3752  | 317.1913 |
| 1625.6999 | 14 | M   | 4  | 519.3323  | 260.1698 |
| 1738.7840 | 15 | L   | 3  | 388.2918  | 194.6496 |
| 1866.8790 | 16 | K   | 2  | 275.2078  | 138.1075 |
|           | 17 | K   | 1  | 147.1128  | 74.0600  |

[\[Click\]](#) to move table

Add to N-term: 42.010565

| Gene           | Description                                    | Peptide with cleaved & acetylated PEXEL |
|----------------|------------------------------------------------|-----------------------------------------|
| PBANKA_1437200 | conserved Plasmodium protein, unknown function | RIL.VGSSKSHDIKEYDTNNFELIK               |

**Ions:**

a  1+  2+  3+

b  1+  2+  3+

c  1+  2+  3+

x  1+  2+  3+

y  1+  2+  3+

z  1+  2+  3+

[\[Deselect All\]](#)

**Neutral Loss:**

NH<sub>3</sub> (\*)

H<sub>2</sub>O (o)

H<sub>3</sub>PO<sub>4</sub> (p)

Immonium ions

Reporter ions

**Mass Type:**

Mono  Avg

Mass Tol:

Th  ppm

**Update**

**Peak Assignment:**

Most Intense

Nearest Match

Peak Detect

**Peak Labels:**

Ion  m/z

None

Width:

Height:

**LVGSSKSHDIKEYDTNNFELIK**, MH+ 2621.3093, m/z 656.0828

File: Rep3\_F5.21791.21791.4, Scan: 21791, Exp. m/z: 656.0856, Charge: 4

Click and drag in the plot to zoom X:  Y:  **Zoom Out** **Print**  Enable tooltip  Plot mass error

MS1 scan: 21774, RT 2771.29

| b+        | #  | Seq      | #  | y+        | y2+       | y3+      |
|-----------|----|----------|----|-----------|-----------|----------|
| 156.1019  | 1  | L        | 22 |           |           |          |
| 255.1703  | 2  | V        | 21 | 2466.2147 | 1233.6110 | 822.7431 |
| 312.1918  | 3  | G        | 20 | 2367.1463 | 1184.0768 | 789.7203 |
| 399.2238  | 4  | S        | 19 | 2310.1248 | 1155.5661 | 770.7131 |
| 486.2558  | 5  | S        | 18 | 2223.0928 | 1112.0500 | 741.7025 |
| 656.3614  | 6  | <b>K</b> | 17 | 2136.0608 | 1068.5340 | 712.6918 |
| 743.3934  | 7  | S        | 16 | 1965.9552 | 983.4813  | 655.9899 |
| 880.4523  | 8  | H        | 15 | 1878.9232 | 939.9652  | 626.9793 |
| 995.4793  | 9  | D        | 14 | 1741.8643 | 871.4358  | 581.2930 |
| 1108.5633 | 10 | I        | 13 | 1626.8374 | 813.9223  | 542.9506 |
| 1236.6583 | 11 | K        | 12 | 1513.7533 | 757.3803  | 505.2560 |
| 1365.7009 | 12 | E        | 11 | 1385.6583 | 693.3328  | 462.5576 |
| 1528.7642 | 13 | Y        | 10 | 1256.6157 | 628.8115  | 419.5434 |
| 1643.7911 | 14 | D        | 9  | 1093.5524 | 547.2798  | 365.1890 |
| 1744.8388 | 15 | T        | 8  | 978.5255  | 489.7664  | 326.8467 |
| 1858.8817 | 16 | N        | 7  | 877.4778  | 439.2425  | 293.1641 |
| 1972.9247 | 17 | N        | 6  | 763.4349  | 382.2211  | 255.1498 |
| 2119.9931 | 18 | F        | 5  | 649.3919  | 325.1996  | 217.1355 |
| 2249.0357 | 19 | E        | 4  | 502.3235  | 251.6654  | 168.1127 |
| 2362.1197 | 20 | L        | 3  | 373.2809  | 187.1441  | 125.0985 |
| 2475.2038 | 21 | I        | 2  | 260.1969  | 130.6021  | 87.4038  |
|           | 22 | K        | 1  | 147.1128  | 74.0600   | 49.7091  |

[\[Click\]](#) to move table

Add to N-term: **42.010565**

Variable Modifications:  
**K: 42.010565 [6]**

| Gene           | Description                                   | Peptide with cleaved & acetylated PEXEL |
|----------------|-----------------------------------------------|-----------------------------------------|
| PBANKA_0316200 | Plasmodium exported protein, unknown function | RIL.SELDEINGFTSEIR                      |

**Ions:**

a  1<sup>+</sup>  2<sup>+</sup>  3<sup>+</sup>

b  1<sup>+</sup>  2<sup>+</sup>  3<sup>+</sup>

c  1<sup>+</sup>  2<sup>+</sup>  3<sup>+</sup>

x  1<sup>+</sup>  2<sup>+</sup>  3<sup>+</sup>

y  1<sup>+</sup>  2<sup>+</sup>  3<sup>+</sup>

z  1<sup>+</sup>  2<sup>+</sup>  3<sup>+</sup>

[\[Deselect All\]](#)

**Neutral Loss:**

NH<sub>3</sub> (\*)

H<sub>2</sub>O (o)

H<sub>3</sub>PO<sub>4</sub> (p)

Immonium ions

Reporter ions

**Mass Type:**

Mono  Avg

Mass Tol:

Th  ppm

**Update**

**Peak Assignment:**

Most Intense

Nearest Match

Peak Detect

**Peak Labels:**

Ion  m/z

None

Width:

Height:

**SELDEINGFTSEIR**, MH+ 1651.7810, m/z 826.3941

File: Rep1\_F1.56561.56561.2, Scan: 56561, Exp. m/z: 826.3954, Charge: 2

Click and drag in the plot to zoom X:  Y:  **Zoom Out** **Print**  Enable tooltip  Plot mass error

MS1 scan: 56533, RT 9420.07

| b+        | b2+      | #  | Seq # | y+        |
|-----------|----------|----|-------|-----------|
| 130.0499  | 65.5286  | 1  | S 14  |           |
| 259.0925  | 130.0499 | 2  | E 13  | 1522.7384 |
| 372.1765  | 186.5919 | 3  | L 12  | 1393.6958 |
| 487.2035  | 244.1054 | 4  | D 11  | 1280.6117 |
| 616.2461  | 308.6267 | 5  | E 10  | 1165.5848 |
| 729.3301  | 365.1687 | 6  | I 9   | 1036.5422 |
| 843.3731  | 422.1902 | 7  | N 8   | 923.4581  |
| 900.3945  | 450.7009 | 8  | G 7   | 809.4152  |
| 1047.4629 | 524.2351 | 9  | F 6   | 752.3937  |
| 1148.5106 | 574.7589 | 10 | T 5   | 605.3253  |
| 1235.5426 | 618.2750 | 11 | S 4   | 504.2776  |
| 1364.5852 | 682.7963 | 12 | E 3   | 417.2456  |
| 1477.6693 | 739.3383 | 13 | I 2   | 288.2030  |
|           |          | 14 | R 1   | 175.1190  |

[\[Click\]](#) to move table

Add to N-term: **42.010565**

| Gene           | Description                                   | Peptide with cleaved & acetylated PEXEL |
|----------------|-----------------------------------------------|-----------------------------------------|
| PBANKA_0100700 | Plasmodium exported protein, unknown function | RLL.AEPTNDLGVNK                         |

**Ions:**

a  1<sup>+</sup>  2<sup>+</sup>  3<sup>+</sup>

b  1<sup>+</sup>  2<sup>+</sup>  3<sup>+</sup>

c  1<sup>+</sup>  2<sup>+</sup>  3<sup>+</sup>

x  1<sup>+</sup>  2<sup>+</sup>  3<sup>+</sup>

y  1<sup>+</sup>  2<sup>+</sup>  3<sup>+</sup>

z  1<sup>+</sup>  2<sup>+</sup>  3<sup>+</sup>

[\[Deselect All\]](#)

**Neutral Loss:**

NH<sub>3</sub> (\*)

H<sub>2</sub>O (o)

H<sub>3</sub>PO<sub>4</sub> (p)

Immonium ions

Reporter ions

**Mass Type:**

Mono  Avg

Mass Tol:

Th  ppm

**Update**

**Peak Assignment:**

Most Intense

Nearest Match

Peak Detect

**Peak Labels:**

Ion  m/z

None

Width:

Height:

**AEPTNDLGVNK, MH+ 1199.5903, m/z 600.2988**

File: Rep2\_F1.11803.11803.2, Scan: 11803, Exp. m/z: 600.2993, Charge: 2

Click and drag in the plot to zoom X:  Y:  **Zoom Out** **Print**  Enable tooltip  Plot mass error

MS1 scan: 11792, RT 2714.42

| b+        | #  | Seq | #  | y+        | y2+      |
|-----------|----|-----|----|-----------|----------|
| 114.0550  | 1  | A   | 11 |           |          |
| 243.0975  | 2  | E   | 10 | 1086.5426 | 543.7749 |
| 340.1503  | 3  | P   | 9  | 957.5000  | 479.2536 |
| 441.1980  | 4  | T   | 8  | 860.4472  | 430.7272 |
| 555.2409  | 5  | N   | 7  | 759.3995  | 380.2034 |
| 670.2679  | 6  | D   | 6  | 645.3566  | 323.1819 |
| 783.3519  | 7  | L   | 5  | 530.3297  | 265.6685 |
| 840.3734  | 8  | G   | 4  | 417.2456  | 209.1264 |
| 939.4418  | 9  | V   | 3  | 360.2241  | 180.6157 |
| 1053.4847 | 10 | N   | 2  | 261.1557  | 131.0815 |
|           | 11 | K   | 1  | 147.1128  | 74.0600  |

[\[Click\]](#) to move table

Add to N-term: **42.010565**



| Gene           | Description                                       | Peptide with cleaved & acetylated PEXEL |
|----------------|---------------------------------------------------|-----------------------------------------|
| PBANKA_0715300 | conserved Plasmodium protein,<br>unknown function | RSL.NENTTPNVMPIPDSKNEIINTESTISDIAEK     |

**Ions:**

a  1+  2+  3+

b  1+  2+  3+

c  1+  2+  3+

x  1+  2+  3+

y  1+  2+  3+

z  1+  2+  3+

[\[Deselect All\]](#)

**Neutral Loss:**

NH<sub>3</sub> (\*)

H<sub>2</sub>O (o)

H<sub>3</sub>PO<sub>4</sub> (p)

Immonium ions

Reporter ions

**Mass Type:**

Mono  Avg

Mass Tol:

Th  ppm

**Update**

**Peak Assignment:**

Most Intense

Nearest Match

Peak Detect

**Peak Labels:**

Ion  m/z

None

Width:

Height:

**NENTTPNVMPIPDSKNEIINTESTISDIAEK**, MH+ 3456.6687, m/z 1152.8944

File: Rep3\_F1.41097.41097.3, Scan: 41097, Exp. m/z: 1152.8945, Charge: 3

Click and drag in the plot to zoom X:  Y:  **Zoom Out** **Print**  Enable tooltip  Plot mass error

MS1 scan: 41089, RT 7618.86

| b+        | #  | Seq | #  | y+        | y2+       |
|-----------|----|-----|----|-----------|-----------|
| 157.0608  | 1  | N   | 31 |           |           |
| 286.1034  | 2  | E   | 30 | 3300.6152 | 1650.8112 |
| 400.1463  | 3  | N   | 29 | 3171.5726 | 1586.2899 |
| 501.1940  | 4  | T   | 28 | 3057.5296 | 1529.2685 |
| 602.2416  | 5  | T   | 27 | 2956.4820 | 1478.7446 |
| 699.2944  | 6  | P   | 26 | 2855.4343 | 1428.2208 |
| 813.3373  | 7  | N   | 25 | 2758.3815 | 1379.6944 |
| 912.4058  | 8  | V   | 24 | 2644.3386 | 1322.6729 |
| 1043.4462 | 9  | M   | 23 | 2545.2702 | 1273.1387 |
| 1140.4990 | 10 | P   | 22 | 2414.2297 | 1207.6185 |
| 1253.5831 | 11 | I   | 21 | 2317.1769 | 1159.0921 |
| 1350.6358 | 12 | P   | 20 | 2204.0929 | 1102.5501 |
| 1465.6628 | 13 | D   | 19 | 2107.0401 | 1054.0237 |
| 1552.6948 | 14 | S   | 18 | 1992.0132 | 996.5102  |
| 1680.7898 | 15 | K   | 17 | 1904.9811 | 952.9942  |
| 1794.8327 | 16 | N   | 16 | 1776.8862 | 888.9467  |
| 1923.8753 | 17 | E   | 15 | 1662.8432 | 831.9253  |
| 2036.9593 | 18 | I   | 14 | 1533.8006 | 767.4040  |
| 2150.0434 | 19 | I   | 13 | 1420.7166 | 710.8619  |
| 2264.0863 | 20 | N   | 12 | 1307.6325 | 654.3199  |
| 2365.1340 | 21 | T   | 11 | 1193.5896 | 597.2984  |
| 2494.1766 | 22 | E   | 10 | 1092.5419 | 546.7746  |
| 2581.2086 | 23 | S   | 9  | 963.4993  | 482.2533  |
| 2682.2563 | 24 | T   | 8  | 876.4673  | 438.7373  |
| 2795.3404 | 25 | I   | 7  | 775.4196  | 388.2134  |
| 2882.3724 | 26 | S   | 6  | 662.3355  | 331.6714  |
| 2997.3994 | 27 | D   | 5  | 575.3035  | 288.1554  |
| 3110.4834 | 28 | I   | 4  | 460.2766  | 230.6419  |
| 3181.5205 | 29 | A   | 3  | 347.1925  | 174.0999  |
| 3310.5631 | 30 | E   | 2  | 276.1554  | 138.5813  |
|           | 31 | K   | 1  | 147.1128  | 74.0600   |

[\[Click\]](#) to move table

Add to N-term: 42.010565
